# Supplementary material for: New RNA Structural Elements Identified in the Coding Region of the Coxsackie B3 Virus Genome
Source: MDPI journal article supplement (doi:10.3390/v12111232), 2020-10-30
Supplement: s1 [file s1]

**SM4 Table. Potential interactions with proteins of the newly identified RNA motifs in CVB3 genome fragments.** Content based on data collected in the *ATtRACT* database (A datAbase of RNA binding proteins and AssoCiated moTifs, <https://attract.cnic.es/index>); mode - sequence search.

| apical part - marked in red |                                                                                                         |          |              |         |        |                         |              |               |       |       |             |                                                                                                                                                                                          |
|-----------------------------|---------------------------------------------------------------------------------------------------------|----------|--------------|---------|--------|-------------------------|--------------|---------------|-------|-------|-------------|------------------------------------------------------------------------------------------------------------------------------------------------------------------------------------------|
| >SL665-748<br>and SL652-752 | CCCUUUGUUGGGUUUAUACCACUUAAGCUUGAAAGAGGUUAAAAACAUUACAAUUCAUUUGUUAAGUUGAAUACAGCAAAUUGGG                   |          |              |         |        |                         |              |               |       |       |             |                                                                                                                                                                                          |
|                             | GAGCUAUUAUUAUCCCUUUGUUGGGUUUAUACCACUUAAGCUUGAAAGAGGUUAAAAACAUUACAAUUCAUUUGUUAAGUUGAAUACAGCAAAUUGGGAGCUC |          |              |         |        |                         |              |               |       |       |             |                                                                                                                                                                                          |
| Gene name                   | Gene id                                                                                                 | Mutated* | Organism     | Motif   | Length | Reference               | Domain       | Quality_score |       |       | Experiments |                                                                                                                                                                                          |
| CELF1                       | ENSG000000149187                                                                                        | no       | Homo_sapiens | UGUU    | 4      | 20947024                | RRM          | 70;19         | 1.835 | 2.608 | 1.556       | X-RAY DIFFRACTION                                                                                                                                                                        |
| CELF1                       | ENSG000000149187                                                                                        | no       | Homo_sapiens | UUGUU   | 5      | 20947024                | RRM          | 69;18         | 3.562 | 4.939 | 3.165       | X-RAY DIFFRACTION                                                                                                                                                                        |
| CELF2                       | ENSG000000048740                                                                                        | no       | Homo_sapiens | UGUU    | 4      | PubMed ID is not availa | RRM          | 70;19         | 1.835 | 2.608 | 1.556       | X-RAY DIFFRACTION                                                                                                                                                                        |
| CELF2                       | ENSG000000048740                                                                                        | no       | Homo_sapiens | UGUUG   | 5      | 15657417                | RRM          | 19            | 3.039 | 3.452 | 2.686       | SELEX of 20nt random with recombinant protein, some winner sequences are verified by EMSA.                                                                                               |
| CELF2                       | ENSG000000048740                                                                                        | no       | Homo_sapiens | UUGUU   | 5      | 15657417                | RRM          | 69;18         | 3.562 | 4.939 | 3.165       | SELEX of 20nt random with recombinant protein, some winner sequences are verified by EMSA.                                                                                               |
| CELF2                       | ENSG000000048740                                                                                        | no       | Homo_sapiens | UUGUU   | 5      | 11931771                | RRM          | 69;18         | 3.562 | 4.939 | 3.165       | UV crosslink, western blot, immunoprecipitation in HeLa nuclear extracts.                                                                                                                |
| ELAVL2                      | ENSG000000107105                                                                                        | no       | Homo_sapiens | GAAA    | 4      | 8668530                 | RRM          | 43            | 0.78  | 0.557 | 0.622       | SELEX                                                                                                                                                                                    |
| ELAVL2                      | ENSG000000107105                                                                                        | no       | Homo_sapiens | GUUUA   | 5      | 8497264                 | RRM          | 25            | 17958 | 4.489 | 3.107       | SELEX of 25nt random with recombinant protein.                                                                                                                                           |
| ENOX1                       | ENSG000000120658                                                                                        | no       | Homo_sapiens | AAUACAG | 7      | 23846655                | RRM          | 80            | 7.092 | 7.161 | 6.654       | RNAcompete                                                                                                                                                                               |
| GRSF1                       | ENSG000000132463                                                                                        | no       | Homo_sapiens | UGGGA   | 5      | 17337441                | RRM          | 92            | 2.439 | 2.685 | 2.404       | protein affinity purification                                                                                                                                                            |
| GRSF1                       | ENSG000000132463                                                                                        | no       | Homo_sapiens | UGGGU   | 5      | 17337441                | RRM          | 22            | 2.962 | 3.741 | 43985       | protein affinity purification                                                                                                                                                            |
| HNRNPA1                     | ENSG000000135486                                                                                        | no       | Homo_sapiens | UUUAUA  | 6      | 12426391                | RRM          | 26            | 4.381 | 6.187 | 3.784       | RNA affinity isolation from HeLa nuclear extract using WT and mutated RNAs. Immunoblotting. Mutational analysis, RNA affinity chromatography, UV cross-linking, immunoprecipitation with |
| HNRNPA1                     | ENSG000000135486                                                                                        | yes      | Homo_sapiens | CUUAG   | 5      | 19404736                | RRM          | 35            | 3.848 | 4.915 | 3.576       | HeLa nuclear extract.                                                                                                                                                                    |
| HNRNPA2B1                   | ENSG000000122566                                                                                        | no       | Homo_sapiens | UUUAUA  | 6      | 12426391                | RRM          | 26            | 4.381 | 6.187 | 3.784       | RNA affinity isolation from HeLa nuclear extract using WT and mutated RNAs. Immunoblotting.                                                                                              |
| HNRNPF                      | ENSG000000169813                                                                                        | no       | Homo_sapiens | UGGGA   | 5      | 17337441                | RRM;ZF_RNPHF | 92            | 2.439 | 2.685 | 2.404       | protein affinity purification                                                                                                                                                            |
| HNRNPF                      | ENSG000000169813                                                                                        | no       | Homo_sapiens | UGGGU   | 5      | 17337441                | RRM;ZF_RNPHF | 22            | 2.962 | 3.741 | 43985       | protein affinity purification                                                                                                                                                            |
| HNRNPF                      | ENSG000000169813                                                                                        | no       | Homo_sapiens | UGGGA   | 5      | 16885237                | RRM;ZF_RNPHF | 92            | 2.439 | 2.685 | 2.404       | NMR titration using recombinant protein                                                                                                                                                  |
| HNRNPF                      | ENSG000000169813                                                                                        | no       | Homo_sapiens | UGGGA   | 5      | 11571276                | RRM;ZF_RNPHF | 92            | 2.439 | 2.685 | 2.404       | RNA affinity binding assays, immunoblot with WT HeLa nuclear extracts or depleted by RNA affinity chromatography.                                                                        |
| HNRNPH1                     | ENSG000000169045                                                                                        | no       | Homo_sapiens | AGAGG   | 5      | 17337441                | ZF_RNPHF     | 46            | 2.572 | 2.435 | 33635       | RNA-affinity chromatography assays with HeLa nuclear extract and immunoblotting.                                                                                                         |
| HNRNPH1                     | ENSG000000169045                                                                                        | no       | Homo_sapiens | UGGGA   | 5      | 17337441                | ZF_RNPHF     | 92            | 2.439 | 2.685 | 2.404       | protein affinity purification                                                                                                                                                            |
| HNRNPH1                     | ENSG000000169045                                                                                        | no       | Homo_sapiens | UGGGU   | 5      | 17337441                | ZF_RNPHF     | 22            | 2.962 | 3.741 | 43985       | protein affinity purification                                                                                                                                                            |
| HNRNPH1                     | ENSG000000169045                                                                                        | no       | Homo_sapiens | UGGGA   | 5      | 20100605                | ZF_RNPHF     | 92            | 2.439 | 2.685 | 2.404       | GST pull-down, mass spectrometry, Immunoprecipitation, western blotting, RNA pull-down assay,                                                                                            |
| HNRNPH1                     | ENSG000000169045                                                                                        | no       | Homo_sapiens | UGGGA   | 5      | 11571276                | ZF_RNPHF     | 92            | 2.439 | 2.685 | 2.404       | REMSA, RNA interference                                                                                                                                                                  |
| HNRNPH1                     | ENSG000000169045                                                                                        | no       | Homo_sapiens | UGGGU   | 5      | 20100605                | ZF_RNPHF     | 22            | 2.962 | 3.741 | 43985       | RNA affinity binding assays, immunoblot with WT HeLa nuclear extracts or depleted by RNA affinity chromatography.                                                                        |
| HNRNPH1                     | ENSG000000169045                                                                                        | no       | Homo_sapiens | UGGGU   | 5      | 18806275                | ZF_RNPHF     | 22            | 2.962 | 3.741 | 43985       | GST pull-down, mass spectrometry, Immunoprecipitation, western blotting, RNA pull-down assay,                                                                                            |
| HNRNPH1                     | ENSG000000169045                                                                                        | no       | Homo_sapiens | UGGGU   | 5      | 18806275                | ZF_RNPHF     | 22            | 2.962 | 3.741 | 43985       | REMSA, RNA interference                                                                                                                                                                  |
| HNRNPH1                     | ENSG000000169045                                                                                        | no       | Homo_sapiens | UGGGU   | 5      | 18806275                | ZF_RNPHF     | 22            | 2.962 | 3.741 | 43985       | Western blotting using HEK293T nuclear extract, immunodepletion, surface plasmon resonance                                                                                               |
| HNRNPH1                     | ENSG000000169045                                                                                        | no       | Homo_sapiens | UGGGU   | 5      | 18806275                | ZF_RNPHF     | 22            | 2.962 | 3.741 | 43985       | UV cross-linking, pull-down assay, immunoblotting in HeLa nuclear extracts with wt and mutated                                                                                           |
| HNRNPH1                     | ENSG000000169045                                                                                        | yes      | Homo_sapiens | UGGGA   | 5      | 12732620                | ZF_RNPHF     | 92            | 2.439 | 2.685 | 2.404       | RNAs.                                                                                                                                                                                    |
| HNRNPH2                     | ENSG000000126945                                                                                        | no       | Homo_sapiens | AGAGG   | 5      | 17337441                | ZF_RNPHF     | 46            | 2.572 | 2.435 | 33635       | RNA-affinity chromatography assays with HeLa nuclear extract and immunoblotting.                                                                                                         |
| HNRNPH2                     | ENSG000000126945                                                                                        | no       | Homo_sapiens | UGGGA   | 5      | 17337441                | ZF_RNPHF     | 92            | 2.439 | 2.685 | 2.404       | protein affinity purification                                                                                                                                                            |
| HNRNPH2                     | ENSG000000126945                                                                                        | no       | Homo_sapiens | UGGGU   | 5      | 17337441                | ZF_RNPHF     | 22            | 2.962 | 3.741 | 43985       | protein affinity purification                                                                                                                                                            |
| HNRNPH2                     | ENSG000000126945                                                                                        | no       | Homo_sapiens | UGGGA   | 5      | 11571276                | ZF_RNPHF     | 92            | 2.439 | 2.685 | 2.404       | RNA affinity binding assays, immunoblot with WT HeLa nuclear extracts or depleted by RNA affinity chromatography.                                                                        |
| HNRNPH2                     | ENSG000000126945                                                                                        | no       | Homo_sapiens | UGGGU   | 5      | 18806275                | ZF_RNPHF     | 22            | 2.962 | 3.741 | 43985       | Western blotting using HEK293T nuclear extract, immunodepletion, surface plasmon resonance                                                                                               |
| HNRNPH2                     | ENSG000000126945                                                                                        | no       | Homo_sapiens | UGGGU   | 5      | 18806275                | ZF_RNPHF     | 22            | 2.962 | 3.741 | 43985       | UV cross-linking, pull-down assay, immunoblotting in HeLa nuclear extracts with wt and mutated                                                                                           |
| HNRNPH2                     | ENSG000000126945                                                                                        | yes      | Homo_sapiens | UGGGA   | 5      | 12732620                | ZF_RNPHF     | 92            | 2.439 | 2.685 | 2.404       | RNAs.                                                                                                                                                                                    |
| HNRNPH3                     | ENSG000000096746                                                                                        | no       | Homo_sapiens | UGGGA   | 5      | 17337441                | RRM          | 92            | 2.439 | 2.685 | 2.404       | protein affinity purification                                                                                                                                                            |
| HNRNPH3                     | ENSG000000096746                                                                                        | no       | Homo_sapiens | UGGGU   | 5      | 17337441                | RRM          | 22            | 2.962 | 3.741 | 43985       | protein affinity purification                                                                                                                                                            |
| HNRNPH3                     | ENSG000000096746                                                                                        | no       | Homo_sapiens | UGGGA   | 5      | 11571276                | RRM          | 92            | 2.439 | 2.685 | 2.404       | RNA affinity binding assays, immunoblot with WT HeLa nuclear extracts or depleted by RNA affinity chromatography.                                                                        |
| HNRNPH3                     | ENSG000000096746                                                                                        | no       | Homo_sapiens | UGGGU   | 5      | 18806275                | RRM          | 22            | 2.962 | 3.741 | 43985       | Western blotting using HEK293T nuclear extract, immunodepletion, surface plasmon resonance                                                                                               |
| HNRNPH3                     | ENSG000000096746                                                                                        | yes      | Homo_sapiens | UGGGA   | 5      | 12732620                | RRM          | 92            | 2.439 | 2.685 | 2.404       | UV cross-linking, pull-down assay, immunoblotting in HeLa nuclear extracts with wt and mutated                                                                                           |
| HNRNPK                      | ENSG000000165119                                                                                        | no       | Homo_sapiens | UCCCUU  | 6      | 11278705                | KH           | 13            | 4.583 | 5.662 | 4.713       | SELEX of 50nt random with recombinant protein. Consensus motif: u/ACCCCu/a. Winners confirmed by EMSA with recombinant protein.                                                          |
| HNRNPL                      | ENSG000000104824                                                                                        | no       | Homo_sapiens | AACA    | 4      | 15889141                | RRM          | 55            | 1.267 | 1.042 | 1.004       | SELEX of 20nt random with recombinant protein. Consensus motif: ACACAC. Pull-down assays,                                                                                                |
| HNRNPL                      | ENSG000000104824                                                                                        | no       | Homo_sapiens | ACAA    | 4      | 15889141                | RRM          | 61            | 1.478 | 1.087 | 1.199       | UV crosslink, immunoprecipitation with HeLa nuclear extracts.                                                                                                                            |
|                             |                                                                                                         |          |              |         |        |                         |              |               |       |       |             | Pull-down assays, UV crosslink, immunoprecipitation with HeLa nuclear extracts.                                                                                                          |

|         |                 |    |              |          |   |          |                       |       |       |       |       |                                                                                                                                                                                                                                   |
|---------|-----------------|----|--------------|----------|---|----------|-----------------------|-------|-------|-------|-------|-----------------------------------------------------------------------------------------------------------------------------------------------------------------------------------------------------------------------------------|
| HNRNPL  | ENSG00000104824 | no | Homo_sapiens | ACAU     | 4 | 15889141 | RRM                   | 56    | 1.405 | 1.431 | 43983 | SELEX of 20nt random with recombinant protein. Consensus motif: ACACACAC. Pull-down assays, UV crosslink, immunoprecipitation with HeLa nuclear extracts.                                                                         |
| HNRNPL  | ENSG00000104824 | no | Homo_sapiens | CCAC     | 4 | 15889141 | RRM                   | 32    | 1.142 | 0.892 | 1.398 | SELEX of 20nt random with recombinant protein. Consensus motif: ACACACAC. Pull-down assays, UV crosslink, immunoprecipitation with HeLa nuclear extracts.                                                                         |
| HNRNPL  | ENSG00000104824 | no | Homo_sapiens | UACA     | 4 | 15889141 | RRM                   | 60;82 | 2.622 | 2.572 | 2.225 | SELEX of 20nt random with recombinant protein. Consensus motif: ACACACAC. Pull-down assays, UV crosslink, immunoprecipitation with HeLa nuclear extracts.                                                                         |
| IGF2BP2 | ENSG00000073792 | no | Homo_sapiens | GAUUAACA | 7 | 23846655 | KH;RRM                | 79    | 19906 | 7.163 | 7.177 | RNAcompete                                                                                                                                                                                                                        |
| IGF2BP2 | ENSG00000073792 | no | Homo_sapiens | CAAUUCA  | 7 | 23846655 | KH;RRM                | 62    | 7.745 | 7.666 | 7.249 | RNAcompete                                                                                                                                                                                                                        |
| IGF2BP3 | ENSG00000136231 | no | Homo_sapiens | CAUU     | 4 | 20371350 | KH;RRM                | 57;67 | 2.138 | 2.552 | 28491 | PAR-clip                                                                                                                                                                                                                          |
| KHDRBS1 | ENSG00000121774 | no | Homo_sapiens | CAAAAU   | 6 | 9341174  | KH                    | 87    | 4.731 | 4.913 | 4.193 | SELEX of 40nt random with recombinant protein. Winners and mutants confirmed by EMSA with recombinant protein.                                                                                                                    |
| KHDRBS1 | ENSG00000121774 | no | Homo_sapiens | UUAAAA   | 6 | 12490714 | KH                    | 51    | 3.655 | 5.356 | 3.163 | Differential display and cDNA-representational difference analysis (cDNA-RDA) in vitro. In vivo coimmunoprecipitation. Further in vitro binding: protein incubated with labeled RNA.                                              |
| KHDRBS1 | ENSG00000121774 | no | Homo_sapiens | UUAAAA   | 6 | 9341174  | KH                    | 51    | 3.655 | 5.356 | 3.163 | SELEX of 40nt random with recombinant protein. Winners and mutants confirmed by EMSA with recombinant protein.                                                                                                                    |
| KHSRP   | ENSG00000088247 | no | Homo_sapiens | GGGU     | 4 | 18684992 | KH                    | 23    | 1.339 | 2.109 | 1.668 | NMR                                                                                                                                                                                                                               |
| KHSRP   | ENSG00000088247 | no | Homo_sapiens | UAUUUAU  | 6 | 18684992 | KH                    | 4     | 4.804 | 6.251 | 4.069 | NMR                                                                                                                                                                                                                               |
| KHSRP   | ENSG00000088247 | no | Homo_sapiens | UAUUUAU  | 6 | 17437720 | KH                    | 4     | 4.804 | 6.251 | 4.069 | NMR and CD with recombinant protein                                                                                                                                                                                               |
| KHSRP   | ENSG00000088247 | no | Homo_sapiens | UAUUUAU  | 6 | 18684992 | KH                    | 4     | 4.804 | 6.251 | 4.069 | NMR, scaffold-independent analysis (SIA) with recombinant protein                                                                                                                                                                 |
| KHSRP   | ENSG00000088247 | no | Homo_sapiens | UGGG     | 4 | 18684992 | KH                    | 92;22 | 1.525 | 1.891 | 1.835 | NMR                                                                                                                                                                                                                               |
| KHSRP   | ENSG00000088247 | no | Homo_sapiens | UGGGU    | 5 | 18684992 | KH                    | 22    | 2.962 | 3.741 | 43985 | NMR                                                                                                                                                                                                                               |
| KHSRP   | ENSG00000088247 | no | Homo_sapiens | UGGGU    | 5 | 18684992 | KH                    | 22    | 2.962 | 3.741 | 43985 | NMR, scaffold-independent analysis (SIA) with recombinant protein                                                                                                                                                                 |
| KHSRP   | ENSG00000088247 | no | Homo_sapiens | UUG      | 4 | 18684992 | KH                    | 36    | 1.735 | 2.943 | 45658 | NMR                                                                                                                                                                                                                               |
| KHSRP   | ENSG00000088247 | no | Homo_sapiens | UUGGG    | 5 | 18684992 | KH                    | 21    | 2.895 | 3.605 | 2.914 | NMR, scaffold-independent analysis (SIA) with recombinant protein                                                                                                                                                                 |
| NOVA1   | ENSG00000139910 | no | Homo_sapiens | UCAU     | 4 | 10811881 | KH                    | 66    | 1.251 | 1.352 | 0.98  | SELEX                                                                                                                                                                                                                             |
| NOVA1   | ENSG00000139910 | no | Homo_sapiens | UUCAU    | 5 | 17655233 | KH                    | 65    | 2.841 | 3.256 | 2.476 | NMR titrations using recombinant protein                                                                                                                                                                                          |
| NOVA1   | ENSG00000139910 | no | Homo_sapiens | CCAC     | 4 | 17655233 | KH                    | 32    | 1.142 | 0.892 | 1.398 | NMR                                                                                                                                                                                                                               |
| NOVA1   | ENSG00000139910 | no | Homo_sapiens | UCAU     | 4 | 17655233 | KH                    | 66    | 1.251 | 1.352 | 0.98  | NMR                                                                                                                                                                                                                               |
| NOVA2   | ENSG00000104967 | no | Homo_sapiens | UCAU     | 4 | 10811881 | KH                    | 66    | 1.251 | 1.352 | 0.98  | SELEX                                                                                                                                                                                                                             |
| OAS1    | ENSG00000089127 | no | Homo_sapiens | UUGA     | 4 | 23319625 | OAS1_C;NTP_TRANSF_2   | 41;77 | 2.225 | 2.437 | 1.882 | X-RAY DIFFRACTION                                                                                                                                                                                                                 |
| PCBP2   | ENSG00000197111 | no | Homo_sapiens | CCCU     | 4 | 17526645 | KH                    | 14    | 0.722 | 0.899 | 1.356 | X-RAY DIFFRACTION                                                                                                                                                                                                                 |
| PIWIL1  | ENSG00000125207 | no | Homo_sapiens | GCUU     | 4 | 21193640 | GAGE;PAZ;PIWI         | 39    | 1.341 | 1.545 | 1.365 | X-RAY DIFFRACTION                                                                                                                                                                                                                 |
| PPIE    | ENSG00000084072 | no | Homo_sapiens | UUAAAA   | 6 | 18258190 | RRM;PRO_ISOMERASE     | 51    | 3.655 | 5.356 | 3.163 | single RNA affinity purification                                                                                                                                                                                                  |
| PPIE    | ENSG00000084072 | no | Homo_sapiens | UAUAUA   | 6 | 18258190 | RRM;PRO_ISOMERASE     | 7     | 4.573 | 6.994 | 3.548 | single RNA affinity purification                                                                                                                                                                                                  |
| PPIE    | ENSG00000084072 | no | Homo_sapiens | AUAUA    | 6 | 18258190 | RRM;PRO_ISOMERASE     | 5     | 5.038 | 6.391 | 4.314 | single RNA affinity purification                                                                                                                                                                                                  |
| PPIE    | ENSG00000084072 | no | Homo_sapiens | UUUAUA   | 6 | 18258190 | RRM;PRO_ISOMERASE     | 26    | 4.381 | 6.187 | 3.784 | single RNA affinity purification                                                                                                                                                                                                  |
| PPIE    | ENSG00000084072 | no | Homo_sapiens | AUAUAU   | 6 | 18258190 | RRM;PRO_ISOMERASE     | 8     | 4.393 | 6.407 | 3.424 | single RNA affinity purification                                                                                                                                                                                                  |
| PPIE    | ENSG00000084072 | no | Homo_sapiens | UAUAUAU  | 6 | 18258190 | RRM;PRO_ISOMERASE     | 6     | 4.698 | 12571 | 4.059 | single RNA affinity purification                                                                                                                                                                                                  |
| PPIE    | ENSG00000084072 | no | Homo_sapiens | UAUAUAU  | 6 | 18258190 | RRM;PRO_ISOMERASE     | 4     | 4.804 | 6.251 | 4.069 | single RNA affinity purification                                                                                                                                                                                                  |
| PTBP1   | ENSG00000011304 | no | Homo_sapiens | CUUA     | 4 | 16179478 | RRM                   | 35    | 1.721 | 2.436 | 1.409 | NMR                                                                                                                                                                                                                               |
| PTBP1   | ENSG00000011304 | no | Homo_sapiens | CUAU     | 4 | 16179478 | RRM                   | 3     | 1.998 | 2.095 | 1.615 | NMR                                                                                                                                                                                                                               |
| PTBP1   | ENSG00000011304 | no | Homo_sapiens | CUUU     | 4 | 16179478 | RRM                   | 16    | 0.583 | 1.353 | 0.37  | NMR                                                                                                                                                                                                                               |
| PTBP1   | ENSG00000011304 | no | Homo_sapiens | CUUG     | 4 | 16179478 | RRM                   | 40    | 1.189 | 1.561 | 1.112 | NMR                                                                                                                                                                                                                               |
| PTBP1   | ENSG00000011304 | no | Homo_sapiens | CCUUU    | 5 | 16179478 | RRM                   | 15    | 2.633 | 3.314 | 2.597 | NMR                                                                                                                                                                                                                               |
| RBM53   | ENSG00000144642 | no | Homo_sapiens | UAUAUA   | 6 | 23846655 | RRM                   | 7     | 4.573 | 6.994 | 3.548 | RNAcompete                                                                                                                                                                                                                        |
| RBM53   | ENSG00000144642 | no | Homo_sapiens | AUAUAUC  | 7 | 23846655 | RRM                   | 8     | 7.769 | 8.734 | 6.968 | RNAcompete                                                                                                                                                                                                                        |
| RBMX    | ENSG00000147274 | no | Homo_sapiens | AAAAU    | 5 | 24692659 | RRM                   | 88    | 2.073 | 2.713 | 1.518 | NMR spectroscopy, isothermal titration calorimetry. EMSA with recombinat protein and other competitor protein (HTra2beta1).                                                                                                       |
| RNASEL  | ENSG00000135828 | no | Homo_sapiens | AAAA     | 4 | 24578532 | ANK;PKINASE;RIBONUC_2 | 53;88 | 1.157 | 1.589 | 0.611 | X-RAY DIFFRACTION                                                                                                                                                                                                                 |
| SRP19   | ENSG00000153037 | no | Homo_sapiens | GAGC     | 4 | 11641499 | SRP19                 | 0;95  | 2.205 | 1.766 | 2.713 | X-RAY DIFFRACTION                                                                                                                                                                                                                 |
| SRP19   | ENSG00000153037 | no | Homo_sapiens | GGAGC    | 5 | 20179341 | SRP19                 | 94    | 2.762 | 2.141 | 27454 | X-RAY DIFFRACTION                                                                                                                                                                                                                 |
| SRP54   | ENSG00000100883 | no | Homo_sapiens | AGGU     | 4 | 12244299 | SRP54,SRP_SPB         | 48    | 41640 | 1.596 | 1.321 | X-RAY DIFFRACTION                                                                                                                                                                                                                 |
| SRP54   | ENSG00000100883 | no | Homo_sapiens | GGAGC    | 5 | 12244299 | SRP54,SRP_SPB         | 94    | 2.762 | 2.141 | 27454 | X-RAY DIFFRACTION                                                                                                                                                                                                                 |
| SRP68   | ENSG00000167881 | no | Homo_sapiens | GGAGC    | 5 | 24700861 | SRP68                 | 94    | 2.762 | 2.141 | 27454 | X-RAY DIFFRACTION                                                                                                                                                                                                                 |
| SRP68   | ENSG00000167881 | no | Homo_sapiens | UAAG     | 4 | 24700861 | SRP68                 | 73    | 1.696 | 2.614 | 1.484 | X-RAY DIFFRACTION                                                                                                                                                                                                                 |
| SRSF10  | ENSG00000188529 | no | Homo_sapiens | AAAGAGG  | 7 | 23846655 | RRM                   | 44    | 6.483 | 6.129 | 6.504 | RNAcompete                                                                                                                                                                                                                        |
| SRSF5   | ENSG00000100650 | no | Homo_sapiens | ACAGC    | 5 | 9649504  | RRM                   | 83    | 3.139 | 2.494 | 3.589 | Functional SELEX of constructs with 20nt random by splicing in HeLa S100 extracts complemented by recombinant protein. Consensus motif: ACDGS. UV crosslink, competition and immunoprecipitation assays in HeLa nuclear extracts. |
| SRSF5   | ENSG00000100650 | no | Homo_sapiens | AGAGG    | 5 | 9649504  | RRM                   | 46    | 2.572 | 2.435 | 33635 | Functional SELEX of constructs with 20nt random by splicing in HeLa S100 extracts complemented by recombinant protein. Consensus motif: ACDGS. UV crosslink, competition and immunoprecipitation assays in HeLa nuclear extracts. |

|         |                 |    |              |        |   |                      |          |      |       |       |       |                                                                                                                                 |
|---------|-----------------|----|--------------|--------|---|----------------------|----------|------|-------|-------|-------|---------------------------------------------------------------------------------------------------------------------------------|
| SRSF9   | ENSG0000011786  | no | Homo_sapiens | ACCAC  | 5 | 17548433             | RRM      | 31   | 3.514 | 36192 | 3.459 | SELEX of 20nt random with recombinant protein. Consensus motif: AGGAC. EMSA, UV crosslink, SDS-PAGE with HeLa nuclear extracts. |
| TIA1    | ENSG00000116001 | no | Homo_sapiens | AUUC   | 4 | 8576255              | RRM      | 64   | 1.525 | 1.747 | 1.194 | SELEX of 68nt random with recombinant protein. Winners confirmed by UV cross-linking and competition assay.                     |
| TIA1    | ENSG00000116001 | no | Homo_sapiens | CUUUG  | 5 | 8576255              | RRM      | 16   | 2.616 | 2.808 | 2.515 | SELEX of 68nt random with recombinant protein. Winners confirmed by UV cross-linking and competition assay.                     |
| TIA1    | ENSG00000116001 | no | Homo_sapiens | GUUUA  | 5 | 8576255              | RRM      | 25   | 17958 | 4.489 | 3.107 | SELEX of 68nt random with recombinant protein. Winners confirmed by UV cross-linking and competition assay.                     |
| TIAL1   | ENSG00000151923 | no | Homo_sapiens | AUUA   | 4 | 8576255              | RRM      | 58;5 | 2.407 | 3.246 | 1.818 | SELEX of 68nt random with recombinant protein. Winners confirmed by UV cross-linking and competition assay.                     |
| TIAL1   | ENSG00000151923 | no | Homo_sapiens | AUUC   | 4 | 8576255              | RRM      | 64   | 1.525 | 1.747 | 1.194 | SELEX of 68nt random with recombinant protein. Winners confirmed by UV cross-linking and competition assay.                     |
| TIAL1   | ENSG00000151923 | no | Homo_sapiens | CUUUG  | 5 | 8576255              | RRM      | 16   | 2.616 | 2.808 | 2.515 | SELEX of 68nt random with recombinant protein. Winners confirmed by UV cross-linking and competition assay.                     |
| XPO5    | ENSG00000124571 | no | Homo_sapiens | GUUU   | 4 | 19965479             | XPO1     | 25   | 0.972 | 1.868 | 0.676 | X-RAY DIFFRACTION                                                                                                               |
| YTHDC1  | ENSG00000083896 | no | Homo_sapiens | GAAUAC | 6 | 20167602             | YTH      | 79   | 6.179 | 5.896 | 5.872 | SELEX                                                                                                                           |
| ZFP36   | ENSG00000128016 | no | Homo_sapiens | CCCUUU | 6 | 18367721             | ZF_CCCH  | 14   | 4.658 | 5.536 | 4.774 | RIP-chip                                                                                                                        |
| ZRANB2  | ENSG00000132485 | no | Homo_sapiens | AGGUUA | 6 | 19304800             | ZF_RANBP | 48   | 5.927 | 6.616 | 5.613 | SELEX of 25nt random with recombinant protein. Consensus motifs: CAGGUAA and AAGGUAA. Fluorescence anisotropy.                  |
| ZRANB2  | ENSG00000132485 | no | Homo_sapiens | GAGGUU | 6 | 19304800             | ZF_RANBP | 47   | 5.295 | 5.765 | 4.913 | SELEX of 25nt random with recombinant protein. Consensus motifs: CAGGUAA and AAGGUAA.                                           |
| SRSF5   | ENSG00000100650 | no | Homo_sapiens | UACAGC | 6 | 11967553;12824367    | RRM      | 82   | 5.711 | 5.025 | 34090 | SELEX                                                                                                                           |
| RBMX    | ENSG00000147274 | no | Homo_sapiens | AAGU   | 4 | 12761049             | RRM      | 74   | 1.262 | 1.367 | 1.056 | Mutagenesis;Deletion analysis                                                                                                   |
| SRSF2   | ENSG00000161547 | no | Homo_sapiens | UUAG   | 4 | 10022872;9710624;762 | RRM      | 36   | 1.735 | 2.943 | 45658 | In vitro splicing assays and RNA competition assays                                                                             |
| HNRNPA1 | ENSG00000135486 | no | Homo_sapiens | UUAG   | 4 | 10022872;9710624;762 | RRM      | 36   | 1.735 | 2.943 | 45658 | In vitro splicing assays and RNA competition assays                                                                             |
| HNRNPH1 | ENSG00000169045 | no | Homo_sapiens | GGGA   | 4 | 11847131;9343212     | ZF_RNPHF | 93   | 0.817 | 1.002 | 1.164 | snRNA inactivation in HeLa cell nuclear extract;Western blot                                                                    |

>SL799-854 apical loop - marked in red

UAGCGGCAAUUCCAUCAUUCACUACACAAAUUAUUAUUAUACAA

GGAUGCCGCAU

| Gene name | Gene id         | Mutated | Organism     | Motif   | Length | Reference | Domain            | Quality_score     | Experiments                                                                                                                                                     |
|-----------|-----------------|---------|--------------|---------|--------|-----------|-------------------|-------------------|-----------------------------------------------------------------------------------------------------------------------------------------------------------------|
| A1CF      | ENSG00000148584 | no      | Homo_sapiens | UUAUUUA | 7      | 23846655  | RRM               | 32 7.527 9.839    | 6.913 RNAcompete                                                                                                                                                |
| HNRNPL    | ENSG00000104824 | no      | Homo_sapiens | ACAA    | 4      | 15889141  | RRM               | 25;41 3.365 2.974 | 3.086 Pull-down assays, UV crosslink, immunoprecipitation with HeLa nuclear extracts.                                                                           |
| HNRNPL    | ENSG00000104824 | no      | Homo_sapiens | ACAC    | 4      | 15889141  | RRM               | 23 2.584 2.448    | 2.497 SELEX of 20nt random with recombinant protein. Pull-down assays, UV crosslink, immunoprecipitation with HeLa nuclear extracts.                            |
| HNRNPL    | ENSG00000104824 | no      | Homo_sapiens | ACACAAA | 7      | 23846655  | RRM               | 23 7.892 8.107    | 7.357 RNAcompete                                                                                                                                                |
| HNRNPL    | ENSG00000104824 | no      | Homo_sapiens | ACACAAA | 7      | 23846655  | RRM               | 23 7.892 8.107    | 7.357 RNAcompete                                                                                                                                                |
| HNRNPL    | ENSG00000104824 | no      | Homo_sapiens | CACA    | 4      | 15889141  | RRM               | 24 2.043 1.976    | 1.966 SELEX of 20nt random with recombinant protein. Consensus motif: ACACACAC. Pull-down assays, UV crosslink, immunoprecipitation with HeLa nuclear extracts. |
| HNRNPL    | ENSG00000104824 | no      | Homo_sapiens | UACA    | 4      | 15889141  | RRM               | 40;22 3.508 3.459 | 3.111 SELEX of 20nt random with recombinant protein. Consensus motif: ACACACAC. Pull-down assays, UV crosslink, immunoprecipitation with HeLa nuclear extracts. |
| IGF2BP3   | ENSG00000136231 | no      | Homo_sapiens | CAUU    | 4      | 20371350  | KH;RRM            | 15 2.025 2.439    | 1.666 PAR-clip                                                                                                                                                  |
| MBNL1     | ENSG00000152601 | no      | Homo_sapiens | AUGCCG  | 6      | 20071745  | ZF_CCCH           | 47 43898 7.305    | 9.228 SELEX of 32nt random with recombinant protein. Consensus motifs: YGCY, YYGCUKY.                                                                           |
| MBNL1     | ENSG00000152601 | no      | Homo_sapiens | UGCC    | 4      | 20071745  | ZF_CCCH           | 48 1.875 1.732    | 2.133 SELEX                                                                                                                                                     |
| NOVA1     | ENSG00000139910 | no      | Homo_sapiens | UCAC    | 4      | 10811881  | KH                | 18 2.351 2.349    | 2.223 SELEX                                                                                                                                                     |
| NOVA1     | ENSG00000139910 | no      | Homo_sapiens | UCAU    | 4      | 10811881  | KH                | 14 2.138 2.238    | 1.867 SELEX                                                                                                                                                     |
| NOVA1     | ENSG00000139910 | no      | Homo_sapiens | UCAC    | 4      | 17655233  | KH                | 18 2.351 2.349    | 2.223 NMR                                                                                                                                                       |
| NOVA1     | ENSG00000139910 | no      | Homo_sapiens | CCAU    | 4      | 17655233  | KH                | 11 2.242 2.114    | 2.141 NMR                                                                                                                                                       |
| NOVA1     | ENSG00000139910 | no      | Homo_sapiens | UCAU    | 4      | 17655233  | KH                | 14 2.138 2.238    | 1.867 NMR                                                                                                                                                       |
| NOVA2     | ENSG00000104967 | no      | Homo_sapiens | UCAC    | 4      | 10811881  | KH                | 18 2.351 2.349    | 2.223 SELEX                                                                                                                                                     |
| NOVA2     | ENSG00000104967 | no      | Homo_sapiens | UCAU    | 4      | 10811881  | KH                | 14 2.138 2.238    | 1.867 SELEX                                                                                                                                                     |
| PABPC1    | ENSG00000070756 | no      | Homo_sapiens | ACAAUUA | 7      | 7908267   | RRM               | 25 7.782 8.322    | 7.113 SELEX                                                                                                                                                     |
| PIIE      | ENSG00000084072 | no      | Homo_sapiens | UAUUAA  | 6      | 18258190  | RRM;PRO_ISOMERASE | 30 5.783 7.219    | 5.268 single RNA affinity purification                                                                                                                          |
| PIIE      | ENSG00000084072 | no      | Homo_sapiens | UAUUUA  | 6      | 18258190  | RRM;PRO_ISOMERASE | 33 5.954 8.047    | 5.371 single RNA affinity purification                                                                                                                          |
| PIIE      | ENSG00000084072 | no      | Homo_sapiens | AUAUUA  | 6      | 18258190  | RRM;PRO_ISOMERASE | 29 5.952 7.157    | 5.304 single RNA affinity purification                                                                                                                          |
| PIIE      | ENSG00000084072 | no      | Homo_sapiens | UAUUUA  | 6      | 18258190  | RRM;PRO_ISOMERASE | 36 5.579 42552    | 4.928 single RNA affinity purification                                                                                                                          |
| PIIE      | ENSG00000084072 | no      | Homo_sapiens | AUUAUU  | 6      | 18258190  | RRM;PRO_ISOMERASE | 31 5.882 7.247    | 5.324 single RNA affinity purification                                                                                                                          |
| PIIE      | ENSG00000084072 | no      | Homo_sapiens | AAAUUU  | 6      | 18258190  | RRM;PRO_ISOMERASE | 27 5.039 43988    | 4.448 single RNA affinity purification                                                                                                                          |
| PIIE      | ENSG00000084072 | no      | Homo_sapiens | AAUUUU  | 6      | 18258190  | RRM;PRO_ISOMERASE | 34 5.589 6.705    | 5.052 single RNA affinity purification                                                                                                                          |
| PIIE      | ENSG00000084072 | no      | Homo_sapiens | UUAUUU  | 6      | 18258190  | RRM;PRO_ISOMERASE | 32 5.348 21002    | 28946 single RNA affinity purification                                                                                                                          |
| PIIE      | ENSG00000084072 | no      | Homo_sapiens | AAUUAU  | 6      | 18258190  | RRM;PRO_ISOMERASE | 28 5.215 6.409    | 4.659 single RNA affinity purification                                                                                                                          |
| PIIE      | ENSG00000084072 | no      | Homo_sapiens | AUUAUU  | 6      | 18258190  | RRM;PRO_ISOMERASE | 35 5.283 6.675    | 24929 single RNA affinity purification                                                                                                                          |
| PTBP1     | ENSG00000011304 | no      | Homo_sapiens | CUAC    | 4      | 16179478  | RRM               | 21 2.958 2.399    | 2.947 NMR                                                                                                                                                       |
| RBMY1A1   | ENSG00000234414 | no      | Homo_sapiens | CACAA   | 5      | 17318228  | RRM               | 24 4.518 4.194    | 4.284 SELEX                                                                                                                                                     |

|        |                 |    |              |          |   |          |      |         |        |       |        |                                                                                                                                                                                                                                                                              |
|--------|-----------------|----|--------------|----------|---|----------|------|---------|--------|-------|--------|------------------------------------------------------------------------------------------------------------------------------------------------------------------------------------------------------------------------------------------------------------------------------|
| SRSF3  | ENSG00000112081 | no | Homo_sapiens | CACUACAC | 8 | 10094314 | RRM  | 19      | 11.152 | 28764 | 10.582 | SELEX of 20-nt random with recombinant protein. Consensus motifs: AGACKACGAY, ACGAGAGAY, WCAUCGAYY, YWCUUCAU and CUWCAAC. Winners confirmed by EMSA with recombinant protein, UV crosslink, complementation assay, immunoprecipitations with HeLa S100 and nuclear extracts. |
| SRSF3  | ENSG00000112081 | no | Homo_sapiens | CAUC     | 4 | 17036044 | RRM  | 12      | 2.322  | 1.776 | 2.484  | NMR spectroscopy                                                                                                                                                                                                                                                             |
| SRSF3  | ENSG00000112081 | no | Homo_sapiens | CAUCAU   | 6 | 17036044 | RRM  | 12      | 6.084  | 16193 | 5.978  | NMR spectroscopy                                                                                                                                                                                                                                                             |
| SRSF3  | ENSG00000112081 | no | Homo_sapiens | UUCAC    | 5 | 17036044 | RRM  | 17      | 4.276  | 4.354 | 4.015  | NMR spectroscopy                                                                                                                                                                                                                                                             |
| SRSF9  | ENSG00000111786 | no | Homo_sapiens | AGGAU    | 5 | 17548433 | RRM  | 44      | 4.172  | 3.932 | 4.083  | SELEX of 20nt random with recombinant protein. Consensus motif: AGGAC. EMSA, UV crosslink, SDS-PAGE with HeLa nuclear extracts.                                                                                                                                              |
| SRSF9  | ENSG00000111786 | no | Homo_sapiens | AGGAU    | 5 | 17548433 | RRM  | 44      | 4.172  | 3.932 | 4.083  | SELEX                                                                                                                                                                                                                                                                        |
| SRSF9  | ENSG00000111786 | no | Homo_sapiens | GGAUGCC  | 7 | 23846655 | RRM  | 45      | 8.123  | 7.359 | 8.919  | RNAcompete                                                                                                                                                                                                                                                                   |
| TIA1   | ENSG00000116001 | no | Homo_sapiens | AUUC     | 4 | 8576255  | RRM  | 16;8    | 3.412  | 3.634 | 3.081  | SELEX of 68nt random with recombinant protein. Winners confirmed by UV cross-linking and competition assay.                                                                                                                                                                  |
| TIAL1  | ENSG00000151923 | no | Homo_sapiens | AUUA     | 4 | 8576255  | RRM  | 31;38;3 | 3.879  | 4.717 | 47178  | SELEX of 68nt random with recombinant protein. Winners confirmed by UV cross-linking and competition assay.                                                                                                                                                                  |
| TIAL1  | ENSG00000151923 | no | Homo_sapiens | AUUC     | 4 | 8576255  | RRM  | 16;8    | 3.412  | 3.634 | 3.081  | SELEX of 68nt random with recombinant protein. Winners confirmed by UV cross-linking and competition assay.                                                                                                                                                                  |
| XPO5   | ENSG00000124571 | no | Homo_sapiens | CCGC     | 4 | 19965479 | XPO1 | 50      | 3.081  | 2.616 | 4.656  | X-RAY DIFFRACTION                                                                                                                                                                                                                                                            |
| YBX1   | ENSG00000065978 | no | Homo_sapiens | CAUC     | 4 | 22730292 | CSD  | 12      | 2.322  | 1.776 | 2.484  | In vivo splicing in HEK-293 cells with wt and mutated sequences, EMSA                                                                                                                                                                                                        |
| YBX1   | ENSG00000065978 | no | Homo_sapiens | CAUC     | 4 | 22730292 | CSD  | 12      | 2.322  | 1.776 | 2.484  | SELEX of 20nt random sequences with recombinant protein. Winners confirmed by EMSA with recombinant protein.                                                                                                                                                                 |
| YTHDC1 | ENSG00000083896 | no | Homo_sapiens | GGAUGC   | 6 | 20167602 | YTH  | 45      | 6.404  | 5.832 | 6.954  | SELEX                                                                                                                                                                                                                                                                        |
| NOVA1  | ENSG00000139910 | no | Homo_sapiens | UCAC     | 4 | 15367696 | KH   | 18      | 2.351  | 2.349 | 2.223  | RNA affinity binding assays                                                                                                                                                                                                                                                  |

>SL2313-2343 apical loop - marked in red

GCUGGUAUCA**AACAAACAUA**GUGGUCCAGC

| Gene name | Gene id         | Mutated | Organism     | Motif   | Length | Reference | Domain  | Quality_score | Experiments        |                                                                                            |
|-----------|-----------------|---------|--------------|---------|--------|-----------|---------|---------------|--------------------|--------------------------------------------------------------------------------------------|
| HNRNPL    | ENSG00000104824 | no      | Homo_sapiens | AACA    | 4      | 15889141  | RRM     | 10;14         | 4.074 3.1107 3.812 | SELEX of 20nt random with recombinant protein. Consensus motif: ACACACAC. Pull-down assays |
| HNRNPL    | ENSG00000104824 | no      | Homo_sapiens | ACAA    | 4      | 15889141  | RRM     | 11            | 3.286 2.894 3.007  | UV crosslink immunoprecipitation with HeLa nuclear extracts.                               |
| HNRNPL    | ENSG00000104824 | no      | Homo_sapiens | ACAU    | 4      | 15889141  | RRM     | 15            | 3.212 3.239 2.867  | Pull-down assays UV crosslink immunoprecipitation with HeLa nuclear extracts.              |
| HNRNPL    | ENSG00000104824 | no      | Homo_sapiens | AAACAAA | 7      | 23846655  | RRM     | 9             | 7.575 8.176 44080  | SELEX of 20nt random with recombinant protein. Consensus motif: ACACACAC. Pull-down assays |
| HNRNPLL   | ENSG00000143889 | no      | Homo_sapiens | ACAAACA | 7      | 23846655  | RRM     | 11            | 8.762 8.922 8.162  | UV crosslink immunoprecipitation with HeLa nuclear extracts.                               |
| IGF2BP2   | ENSG00000073792 | no      | Homo_sapiens | ACAAACA | 7      | 23846655  | KH;RRM  | 11            | 8.762 8.922 8.162  | RNAcompete                                                                                 |
| IGF2BP3   | ENSG00000136231 | no      | Homo_sapiens | ACAAACA | 7      | 23846655  | KH;RRM  | 11            | 8.762 8.922 8.162  | RNAcompete                                                                                 |
| NOVA1     | ENSG00000139910 | no      | Homo_sapiens | CCAG    | 4      | 17655233  | KH      | 26            | 2.306 1.995 24504  | RNAcompete                                                                                 |
| PABPC1    | ENSG00000070756 | no      | Homo_sapiens | ACAAACA | 7      | 7908267   | RRM     | 11            | 8.762 8.922 8.162  | SELEX                                                                                      |
| PTBP1     | ENSG00000011304 | no      | Homo_sapiens | CUGG    | 4      | 16179478  | RRM     | 1             | 2.221 1.981 2.591  | NMR                                                                                        |
| RBMX      | ENSG00000147274 | no      | Homo_sapiens | AUCAAA  | 6      | 24692659  | RRM     | 6             | 7.191 6.841 6.796  | NMR spectroscopy isothermal titration calorimetry                                          |
| RBMX      | ENSG00000147274 | no      | Homo_sapiens | UCAAA   | 5      | 24692659  | RRM     | 7             | 35156 4.959 43955  | SOLUTION NMR                                                                               |
| SAMD4A    | ENSG00000020577 | no      | Homo_sapiens | GCUGGUA | 7      | 23846655  | SAM     | 0             | 9.654 9.681 9.788  | RNAcompete                                                                                 |
| SRP14     | ENSG00000140319 | no      | Homo_sapiens | GUGG    | 4      | 11089964  | SRP14   | 20            | 2.639 2.503 3.0    | X-RAY DIFFRACTION                                                                          |
| ZNF346    | ENSG00000113761 | no      | Homo_sapiens | GUGGU   | 5      | 24521053  | ZF_C2H2 | 20            | 4.999 33329 5.001  | SOLUTION NMR                                                                               |

>SL2562-2590 apical loop - marked in red

GUCACACGUCAC**AAGUA**GUGCCGGUGAC;

| Gene name | Gene id         | Mutated | Organism     | Motif  | Length | Reference | Domain       | Quality_score | Experiments        |                                                                                                                                                                            |
|-----------|-----------------|---------|--------------|--------|--------|-----------|--------------|---------------|--------------------|----------------------------------------------------------------------------------------------------------------------------------------------------------------------------|
| FUS       | ENSG00000089280 | no      | Homo_sapiens | GGGUGA | 6      | 11098054  | RRM          | 22            | 6.831 7.462 7.302; | SELEX of 25nt random with recombinant protein. Consensus motif: GGUG. SDS-PAGE; EMSA; UV crosslink; competition and immunoprecipitation assays with HeLa nuclear extracts. |
| FUS       | ENSG00000089280 | no      | Homo_sapiens | GGUG   | 4      | 11098054  | ZF_RANBP;RRM | 23            | 2.813 2.917 3.206  | SELEX                                                                                                                                                                      |
| HNRNPL    | ENSG00000104824 | no      | Homo_sapiens | ACAA   | 4      | 15889141  | RRM          | 10            | 3.393 3.001 3.113; | Pull-down assays; UV crosslink;immunoprecipitation with HeLa nuclear extracts.                                                                                             |
| HNRNPL    | ENSG00000104824 | no      | Homo_sapiens | ACAC   | 4      | 15889141  | RRM          | 3             | 3.612 3.476 3.524; | SELEX of 20nt random with recombinant protein. Pull-down assays; UV crosslink;immunoprecipitation with HeLa nuclear extracts.                                              |
| HNRNPL    | ENSG00000104824 | no      | Homo_sapiens | CACA   | 4      | 15889141  | RRM          | 9;2           | 44016 4.004 3.994  | SELEX of 20nt random with recombinant protein. Consensus motif: ACACACAC. Pull-down assays; UV crosslink;immunoprecipitation with HeLa nuclear extracts.                   |
| HNRNPL    | ENSG00000104824 | no      | Homo_sapiens | CACG   | 4      | 15889141  | RRM          | 4             | 4.768 4.209 5.357; | SELEX of 20nt random with recombinant protein. Consensus motif: ACACACAC. Pull-down assays; UV crosslink;immunoprecipitation with HeLa nuclear extracts.                   |
| KHSRP     | ENSG00000088247 | no      | Homo_sapiens | GGGU   | 4      | 18684992  | KH           | 22            | 3.253 4.023 3.582; | NMR                                                                                                                                                                        |
| MBNL1     | ENSG00000152601 | no      | Homo_sapiens | UGCC   | 4      | 20071745  | ZF_CCCH      | 18            | 2.902 2.759 3.161; | SELEX                                                                                                                                                                      |
| NOVA1     | ENSG00000139910 | no      | Homo_sapiens | UCAC   | 4      | 10811881  | KH           | 8;1           | 4.379 4.376 4.251  | SELEX                                                                                                                                                                      |
| NOVA1     | ENSG00000139910 | no      | Homo_sapiens | UCAC   | 4      | 17655233  | KH           | 8;1           | 4.379 4.376 4.251  | NMR                                                                                                                                                                        |
| NOVA2     | ENSG00000104967 | no      | Homo_sapiens | UCAC   | 4      | 10811881  | KH           | 8;1           | 4.379 4.376 4.251  | SELEX                                                                                                                                                                      |

| RBMY1A1                                                   | ENSG00000234414 | no      | Homo_sapiens | CACAA   | 5      | 17318228          | RRM                   | 9      | 5.575         | 45778  | 5.341;      | SELEX                                                                                                                                                                                                                               |
|-----------------------------------------------------------|-----------------|---------|--------------|---------|--------|-------------------|-----------------------|--------|---------------|--------|-------------|-------------------------------------------------------------------------------------------------------------------------------------------------------------------------------------------------------------------------------------|
| SRSF2                                                     | ENSG00000161547 | no      | Homo_sapiens | AGUAG   | 5      | 11847131          | RRM                   | 13     | 5.715         | 6.569  | 5.099;      | RNA affinity chromatography assay and immunoblot.                                                                                                                                                                                   |
| SRSF5                                                     | ENSG00000100650 | no      | Homo_sapiens | ACACG   | 5      | 9649504           | RRM                   | 3      | 7.165         | 6.565  | 7.679;      | Functional SELEX of constructs with 20nt random by splicing in HeLa S100 extracts complemented by recombinant protein. Consensus motif: ACDGS. UV crosslink; competition and immunoprecipitation assays in HeLa nuclear extracts.   |
| YTHDC1                                                    | ENSG00000083896 | no      | Homo_sapiens | UAGUGC  | 6      | 20167602          | YTH                   | 15     | 17746         | 9.049  | 8.182;      | SELEX                                                                                                                                                                                                                               |
| ZRANB2                                                    | ENSG00000132485 | no      | Homo_sapiens | GGGUGA  | 6      | 19304800          | ZF_RANBP              | 22     | 6.831         | 7.462  | 7.302;      | SELEX of 25nt random with recombinant protein. Consensus motifs: CAGGUAA and AAGGUAA.                                                                                                                                               |
| SRSF5                                                     | ENSG00000100650 | no      | Homo_sapiens | CACGUC  | 6      | 11967553;12824367 | RRM                   | 4      | 9.099         | 20302  | 9.831       | SELEX                                                                                                                                                                                                                               |
| RBMX                                                      | ENSG00000147274 | no      | Homo_sapiens | AAGU    | 4      | 12761049          | RRM                   | 12     | 3.176         | 3.281  | 2.971       | Mutagenesis;Deletion analysis                                                                                                                                                                                                       |
| SRSF6                                                     | ENSG00000124193 | no      | Homo_sapiens | UCACACG | 7      | 11967553;12824367 | RRM                   | 1      | 11.358        | 11.035 | 11.791      | SELEX                                                                                                                                                                                                                               |
| SRSF1                                                     | ENSG00000136450 | no      | Homo_sapiens | CACACGU | 7      | 11967553;12824367 | RRM                   | 2      | 10.857        | 11.047 | 10.942      | SELEX                                                                                                                                                                                                                               |
| NOVA1                                                     | ENSG00000139910 | no      | Homo_sapiens | UCAC    | 4      | 15367696          | KH                    | 8;1    | 4.379         | 4.376  | 4.251       | RNA affinity binding assays                                                                                                                                                                                                         |
| >SL2664-2719 apical loop - marked in red                  |                 |         |              |         |        |                   |                       |        |               |        |             |                                                                                                                                                                                                                                     |
| UCAGCAUGCUGUACUUUACGGAGUAUGAAAAACUCAGGUGCCAAGCGGU AUGCUGA |                 |         |              |         |        |                   |                       |        |               |        |             |                                                                                                                                                                                                                                     |
| Gene name                                                 | Gene id         | Mutated | Organism     | Motif   | Length | Reference         |                       | Domain | Quality_score |        | Experiments |                                                                                                                                                                                                                                     |
| CELF2                                                     | ENSG00000048740 | no      | Homo_sapiens | CGUGU   | 5      | 15657417          | RRM                   | 8      | 5.648         | 5.374  | 6.178       | SELEX of 20nt random with recombinant protein; some winner sequences are verified by EMSA.                                                                                                                                          |
| CPEB4                                                     | ENSG00000113742 | no      | Homo_sapiens | CUUUA   | 5      | 24990967          | RRM                   | 14     | 4.029         | 4.889  | 3.656       | SOLUTION NMR                                                                                                                                                                                                                        |
| ELAVL2                                                    | ENSG00000107105 | no      | Homo_sapiens | CUUUA   | 5      | 8497264           | RRM                   | 14     | 4.029         | 4.889  | 3.656       | SELEX of 25nt random with recombinant protein.                                                                                                                                                                                      |
| ELAVL2                                                    | ENSG00000107105 | no      | Homo_sapiens | GAAA    | 4      | 8668530           | RRM                   | 27     | 1.667         | 1.443  | 1.508       | SELEX                                                                                                                                                                                                                               |
| FUS                                                       | ENSG00000089280 | no      | Homo_sapiens | GGUG    | 4      | 11098054          | ZF_RANBP;RRM          | 36     | 1.786         | 1.889  | 2.179       | SELEX                                                                                                                                                                                                                               |
| IGF2BP2                                                   | ENSG00000073792 | no      | Homo_sapiens | AAACUCA | 7      | 23846655          | KH;RRM                | 29     | 7.934         | 7.737  | 7.697       | RNAcompete                                                                                                                                                                                                                          |
| IGF2BP3                                                   | ENSG00000136231 | no      | Homo_sapiens | AAACUCA | 7      | 23846655          | KH;RRM                | 29     | 7.934         | 7.737  | 7.697       | RNAcompete                                                                                                                                                                                                                          |
| KHDRB51                                                   | ENSG00000121774 | no      | Homo_sapiens | GAAAC   | 6      | 9341174           | KH                    | 27     | 30803         | 5.427  | 5.723       | SELEX of 40nt random with recombinant protein. Winners and mutants confirmed by EMSA with recombinant protein.                                                                                                                      |
| LIN28A                                                    | ENSG00000131914 | no      | Homo_sapiens | CGGAGUA | 7      | 23846655          | ZF_CCHC;CSD           | 19     | 10.971        | 10.174 | 11.476      | RNAcompete                                                                                                                                                                                                                          |
| MBNL1                                                     | ENSG00000152601 | no      | Homo_sapiens | UGCC    | 4      | 20071745          | ZF_CCCH               | 38     | 1.875         | 1.732  | 2.133       | SELEX                                                                                                                                                                                                                               |
| MBNL1                                                     | ENSG00000152601 | no      | Homo_sapiens | UGCUG   | 4      | 20071745          | ZF_CCCH               | 50     | 1.774         | 1.671  | 1.879       | SELEX                                                                                                                                                                                                                               |
| NOVA1                                                     | ENSG00000139910 | no      | Homo_sapiens | UCAG    | 4      | 17655233          | KH                    | 0;33   | 2.818         | 44014  | 2.854       | NMR                                                                                                                                                                                                                                 |
| NUDT21                                                    | ENSG00000167005 | no      | Homo_sapiens | UGUA    | 4      | 21295486          | NUDIX_2               | 10     | 2.321         | 3.063  | 1.894       | X-RAY DIFFRACTION                                                                                                                                                                                                                   |
| PTBP1                                                     | ENSG00000011304 | no      | Homo_sapiens | CUCA    | 4      | 16179478          | RRM                   | 32     | 1.885         | 1.861  | 1.817       | NMR                                                                                                                                                                                                                                 |
| PTBP1                                                     | ENSG00000011304 | no      | Homo_sapiens | CUGA    | 4      | 16179478          | RRM                   | 52     | 1.794         | 1.627  | 1.921       | NMR                                                                                                                                                                                                                                 |
| PTBP1                                                     | ENSG00000011304 | no      | Homo_sapiens | CUUU    | 4      | 16179478          | RRM                   | 14     | 17168         | 45323  | 1.257       | NMR                                                                                                                                                                                                                                 |
| RBFOX1                                                    | ENSG00000078328 | no      | Homo_sapiens | AGCAUG  | 6      | 22434879          | RRM                   | 2      | 41791         | 5.937  | 6.083       | Mutational analysis. In vivo splicing with wt and mutated sequences.                                                                                                                                                                |
| RBFOX1                                                    | ENSG00000078328 | no      | Homo_sapiens | AGCAUG  | 6      | 16537540          | RRM                   | 2      | 41791         | 5.937  | 6.083       | SELEX of 40nt random with recombinant protein. Consensus motif: UGCAUG. Immunoblot; siRNA; pulldown assay.                                                                                                                          |
| RBFOX1                                                    | ENSG00000078328 | no      | Homo_sapiens | AGCAUGC | 7      | 23846655          | RRM                   | 2      | 8.587         | 8.209  | 8.701       | RNAcompete                                                                                                                                                                                                                          |
| RNASEL                                                    | ENSG00000135828 | no      | Homo_sapiens | AAAA    | 4      | 24578532          | ANK;PKINASE;RIBONUC_2 | 28     | 1.043         | 1.475  | 0.498       | X-RAY DIFFRACTION                                                                                                                                                                                                                   |
| SRP54                                                     | ENSG00000100883 | no      | Homo_sapiens | AGGU    | 4      | 12244299          | SRP54;SRP_SPB         | 35     | 2.026         | 2.483  | 2.208       | X-RAY DIFFRACTION                                                                                                                                                                                                                   |
| SRP68                                                     | ENSG00000167881 | no      | Homo_sapiens | UGCUG   | 5      | 24700861          | SRP68                 | 50     | 3.209         | 2.713  | 3.544       | X-RAY DIFFRACTION                                                                                                                                                                                                                   |
| SRSF1                                                     | ENSG00000136450 | no      | Homo_sapiens | CUCAGGU | 7      | 9649504           | RRM                   | 32     | 7.358         | 8.158  | 7.405       | Functional SELEX of constructs with 20nt random by splicing in HeLa S100 extracts complemented by recombinant protein. Consensus motif: SRSASGA. UV crosslink; competition and immunoprecipitation assays in HeLa nuclear extracts. |
| SRSF2                                                     | ENSG00000161547 | no      | Homo_sapiens | GGAGUA  | 6      | 23846655          | RRM                   | 20     | 6.886         | 6.657  | 6.833       | RNAcompete                                                                                                                                                                                                                          |
| SRSF6                                                     | ENSG00000124193 | no      | Homo_sapiens | UGCUG   | 6      | 9649504           | RRM                   | 6      | 47300         | 7.181  | 8.093       | Functional SELEX of constructs with 20nt random by splicing in HeLa S100 extracts complemented by recombinant protein. Consensus motif: USCGKM. UV crosslink; competition and immunoprecipitation assays in HeLa nuclear extracts.  |
| SRSF9                                                     | ENSG00000111786 | no      | Homo_sapiens | AUGAAA  | 7      | 23846655          | RRM                   | 25     | 6.902         | 6.695  | 6.552       | RNAcompete                                                                                                                                                                                                                          |
| SRSF9                                                     | ENSG00000111786 | no      | Homo_sapiens | CGGAG   | 5      | 17548433          | RRM                   | 19     | 5.038         | 4.375  | 6.252       | SELEX of 20nt random with recombinant protein. Consensus motif: AGGAC. EMSA, UV crosslink, SDS-PAGE with HeLa nuclear extracts.                                                                                                     |
| SSB                                                       | ENSG00000138385 | no      | Homo_sapiens | UGCUG   | 5      | 16387655          | LA;RM                 | 50     | 3.209         | 2.713  | 3.544       | X-RAY DIFFRACTION                                                                                                                                                                                                                   |
| TIA1                                                      | ENSG00000116001 | no      | Homo_sapiens | CUUUA   | 5      | 8576255           | RRM                   | 14     | 4.029         | 4.889  | 3.656       | SELEX of 68nt random with recombinant protein. Winners confirmed by UV cross-linking and competition assay.                                                                                                                         |
| TIAL1                                                     | ENSG00000151923 | no      | Homo_sapiens | CUUUA   | 5      | 8576255           | RRM                   | 14     | 4.029         | 4.889  | 3.656       | SELEX of 68nt random with recombinant protein. Winners confirmed by UV cross-linking and competition assay.                                                                                                                         |
| YTHDC1                                                    | ENSG00000083896 | no      | Homo_sapiens | GCAUGC  | 6      | 20167602          | YTH                   | 3      | 6.688         | 6.608  | 6.623       | EMSA                                                                                                                                                                                                                                |
| YTHDC1                                                    | ENSG00000083896 | no      | Homo_sapiens | GCAUGC  | 6      | 20167602          | YTH                   | 3      | 6.688         | 6.608  | 6.623       | SELEX                                                                                                                                                                                                                               |
| ZRANB2                                                    | ENSG00000132485 | no      | Homo_sapiens | CGGUUA  | 6      | 19304800          | ZF_RANBP              | 45     | 9.411         | 9.078  | 9.833       | SELEX of 25nt random with recombinant protein. Consensus motifs: CAGGUAA and AAGGUAA.                                                                                                                                               |
| SRSF5                                                     | ENSG00000100650 | no      | Homo_sapiens | UACGGA  | 6      | 11967553;12824367 | RRM                   | 17     | 8.989         | 8.124  | 9.627       | SELEX                                                                                                                                                                                                                               |

| <div> <div>&gt;SL4558-4656</div> <div>apical loop - marked in red</div> <div>GGCCGUGGUGAUUAGGACGAUCUAUGCCAGAAUCCUGAUGGGAAAGACUCUCUUGUUCUGCCAAAGUUUCCAGUGUAGAUUUUUGUACCAACCAUGG</div> </div> |                 |         |              |         |        |                  |              |               |             |                                                                                                                                                                            |  |
|---------------------------------------------------------------------------------------------------------------------------------------------------------------------------------------------|-----------------|---------|--------------|---------|--------|------------------|--------------|---------------|-------------|----------------------------------------------------------------------------------------------------------------------------------------------------------------------------|--|
| Gene name                                                                                                                                                                                   | Gene id         | Mutated | Organism     | Motif   | Length | Reference        | Domain       | Quality_score | Experiments |                                                                                                                                                                            |  |
| CELF1                                                                                                                                                                                       | ENSG00000149187 | no      | Homo_sapiens | UGUU    | 4      | 20947024         | RRM          | 1.617 14277   | 1.338       | X-RAY DIFFRACTION                                                                                                                                                          |  |
| ACO1                                                                                                                                                                                        | ENSG00000122729 | no      | Homo_sapiens | CAGUGU  | 6      | 8021254          | ACONITASE_C  | 5.925 34090   | 5.912       | SELEX                                                                                                                                                                      |  |
| CELF1                                                                                                                                                                                       | ENSG00000149187 | no      | Homo_sapiens | UUGUU   | 5      | 20947024         | RRM          | 3.354 4.731   | 2.958       | X-RAY DIFFRACTION                                                                                                                                                          |  |
| CELF2                                                                                                                                                                                       | ENSG00000048740 | no      | Homo_sapiens | UGUU    | 4      | available        | RRM          | 1.617 14277   | 1.338       | X-RAY DIFFRACTION                                                                                                                                                          |  |
| CELF2                                                                                                                                                                                       | ENSG00000048740 | no      | Homo_sapiens | UUGUU   | 5      | 15657417         | RRM          | 3.354 4.731   | 2.958       | SELEX of 20nt random with recombinant protein;some winner sequences are verified by EMSA.                                                                                  |  |
| CELF2                                                                                                                                                                                       | ENSG00000048740 | no      | Homo_sapiens | UUGUU   | 5      | 11931771         | RRM          | 3.354 4.731   | 2.958       | UV crosslink; western blot; immunoprecipitation in HeLa nuclear extracts.                                                                                                  |  |
| CELF2                                                                                                                                                                                       | ENSG00000048740 | no      | Homo_sapiens | UGUUC   | 5      | 15657417         | RRM          | 4.285 4.558   | 4.199       | SELEX of 20nt random with recombinant protein some winner sequences are verified by EMSA.                                                                                  |  |
| CMTR1                                                                                                                                                                                       | ENSG00000137200 | no      | Homo_sapiens | GAUC    | 4      | 24402442         | FTSJ;G-PATCH | 2.884 2.436   | 2.799       | X-RAY DIFFRACTION                                                                                                                                                          |  |
| ELAVL1                                                                                                                                                                                      | ENSG00000066044 | no      | Homo_sapiens | AUUU    | 4      | 23519412         | RRM          | 1.525 2.659   | 1.034       | X-RAY DIFFRACTION                                                                                                                                                          |  |
| ELAVL1                                                                                                                                                                                      | ENSG00000066044 | no      | Homo_sapiens | AUUUU   | 5      | 23519412         | RRM          | 2.874 4.474   | 2.317       | X-RAY DIFFRACTION                                                                                                                                                          |  |
| ELAVL1                                                                                                                                                                                      | ENSG00000066044 | no      | Homo_sapiens | UUUU    | 4      | 23519412         | RRM          | 0.793 2.648   | 0.257       | X-RAY DIFFRACTION                                                                                                                                                          |  |
| ELAVL2                                                                                                                                                                                      | ENSG00000107105 | no      | Homo_sapiens | GAAA    | 4      | 8668530          | RRM          | 1.562 1.339   | 1.403       | SELEX                                                                                                                                                                      |  |
| ELAVL2                                                                                                                                                                                      | ENSG00000107105 | no      | Homo_sapiens | GUUUC   | 5      | 8497264          | RRM          | 4.264 4.956   | 4.043       | SELEX of 25nt random with recombinant protein.                                                                                                                             |  |
| ELAVL4                                                                                                                                                                                      | ENSG00000162374 | no      | Homo_sapiens | AUUU    | 4      | 11175903         | RRM          | 1.525 2.659   | 1.034       | X-RAY DIFFRACTION                                                                                                                                                          |  |
| ESRP2                                                                                                                                                                                       | ENSG00000103067 | no      | Homo_sapiens | UGGGAAA | 7      | 23846655         | RRM          | 33390 6.723   | 6.984       | RNAcompete                                                                                                                                                                 |  |
| FUS                                                                                                                                                                                         | ENSG00000089280 | no      | Homo_sapiens | GGUG    | 4      | 11098054         | ZF_RANBP;RRM | 1.681 1.785   | 2.074       | SELEX                                                                                                                                                                      |  |
| FUS                                                                                                                                                                                         | ENSG00000089280 | no      | Homo_sapiens | UGGUGA  | 6      | 11098054         | RRM          | 5.374 5.178   | 5.496       | SELEX of 25nt random with recombinant protein. Consensus motif: GGUG. SDS-PAGE; EMSA; UV crosslink; competition and immunoprecipitation assays with HeLa nuclear extracts. |  |
| GRSF1                                                                                                                                                                                       | ENSG00000132463 | no      | Homo_sapiens | UGGGA   | 5      | 17337441         | RRM          | 3.232 3.478   | 3.196       | protein affinity purification                                                                                                                                              |  |
| HNRNPF                                                                                                                                                                                      | ENSG00000169813 | no      | Homo_sapiens | UGGGA   | 5      | 17337441         | RRM;ZF_RNPHF | 3.232 3.478   | 3.196       | protein affinity purification                                                                                                                                              |  |
| HNRNPF                                                                                                                                                                                      | ENSG00000169813 | no      | Homo_sapiens | UGGGA   | 5      | 16885237         | RRM;ZF_RNPHF | 3.232 3.478   | 3.196       | NMR titration using recombinant protein                                                                                                                                    |  |
| HNRNPF                                                                                                                                                                                      | ENSG00000169813 | no      | Homo_sapiens | UGGGA   | 5      | 11571276         | RRM;ZF_RNPHF | 3.232 3.478   | 3.196       | immunoblot with WT HeLa nuclear extracts or depleted by RNA affinity chromatography;RNA                                                                                    |  |
| HNRNPH1                                                                                                                                                                                     | ENSG00000169045 | no      | Homo_sapiens | UGGGA   | 5      | 17337441         | ZF_RNPHF     | 3.232 3.478   | 3.196       | affinity binding assays                                                                                                                                                    |  |
| HNRNPH1                                                                                                                                                                                     | ENSG00000169045 | no      | Homo_sapiens | UGGGA   | 5      | 20100605         | ZF_RNPHF     | 3.232 3.478   | 3.196       | protein affinity purification                                                                                                                                              |  |
| HNRNPH1                                                                                                                                                                                     | ENSG00000169045 | no      | Homo_sapiens | UGGGA   | 5      | 11571276         | ZF_RNPHF     | 3.232 3.478   | 3.196       | GST pull-down; western blotting; mass spectrometry; Immunoprecipitation; RNA pull-down assay;                                                                              |  |
| HNRNPH1                                                                                                                                                                                     | ENSG00000169045 | no      | Homo_sapiens | UGGGA   | 5      | 11571276         | ZF_RNPHF     | 3.232 3.478   | 3.196       | REMSA; RNA interference                                                                                                                                                    |  |
| HNRNPH1                                                                                                                                                                                     | ENSG00000169045 | yes     | Homo_sapiens | UGGGA   | 5      | 12732620         | ZF_RNPHF     | 3.232 3.478   | 3.196       | immunoblot with WT HeLa nuclear extracts or depleted by RNA affinity chromatography; RNA                                                                                   |  |
| HNRNPH1                                                                                                                                                                                     | ENSG00000169045 | no      | Homo_sapiens | GGGA    | 4      | 11847131;9343212 | ZF_RNPHF     | 1.599 1.784   | 1.945       | affinity binding assays                                                                                                                                                    |  |
| HNRNPH2                                                                                                                                                                                     | ENSG00000126945 | no      | Homo_sapiens | UGGGA   | 5      | 17337441         | ZF_RNPHF     | 3.232 3.478   | 3.196       | snRNA inactivation in HeLa cell nuclear extract;Western blot                                                                                                               |  |
| HNRNPH2                                                                                                                                                                                     | ENSG00000126945 | no      | Homo_sapiens | UGGGA   | 5      | 11571276         | ZF_RNPHF     | 3.232 3.478   | 3.196       | protein affinity purification                                                                                                                                              |  |
| HNRNPH2                                                                                                                                                                                     | ENSG00000126945 | no      | Homo_sapiens | UGGGA   | 5      | 11571276         | ZF_RNPHF     | 3.232 3.478   | 3.196       | immunoblot with WT HeLa nuclear extracts or depleted by RNA affinity chromatography; RNA                                                                                   |  |
| HNRNPH2                                                                                                                                                                                     | ENSG00000126945 | yes     | Homo_sapiens | UGGGA   | 5      | 12732620         | ZF_RNPHF     | 3.232 3.478   | 3.196       | affinity binding assays                                                                                                                                                    |  |
| HNRNPH3                                                                                                                                                                                     | ENSG00000096746 | no      | Homo_sapiens | UGGGA   | 5      | 17337441         | RRM          | 3.232 3.478   | 3.196       | UV cross-linking; immunoblotting in HeLa nuclear extracts with wt and mutated RNAs; pull-down                                                                              |  |
| HNRNPH3                                                                                                                                                                                     | ENSG00000096746 | no      | Homo_sapiens | UGGGA   | 5      | 11571276         | RRM          | 3.232 3.478   | 3.196       | assay; immunoblotting in HeLa nuclear extracts with wt and mutated RNAs.                                                                                                   |  |
| HNRNPH3                                                                                                                                                                                     | ENSG00000096746 | no      | Homo_sapiens | UGGGA   | 5      | 11571276         | RRM          | 3.232 3.478   | 3.196       | protein affinity purification                                                                                                                                              |  |
| HNRNPH3                                                                                                                                                                                     | ENSG00000096746 | yes     | Homo_sapiens | UGGGA   | 5      | 12732620         | RRM          | 3.232 3.478   | 3.196       | immunoblot with WT HeLa nuclear extracts or depleted by RNA affinity chromatography.RNA                                                                                    |  |
| HNRNPK                                                                                                                                                                                      | ENSG00000165119 | no      | Homo_sapiens | ACCCAU  | 6      | 11278705         | KH           | 6.906 6.902   | 6.835       | affinity binding assays                                                                                                                                                    |  |
| HNRNPL                                                                                                                                                                                      | ENSG00000104824 | no      | Homo_sapiens | CACC    | 4      | 15889141         | RRM          | 2.274 1.891   | 2.547       | UV cross-linking; immunoblotting in HeLa nuclear extracts with wt and mutated RNAs. pull-down                                                                              |  |
| HNRNPL                                                                                                                                                                                      | ENSG00000104824 | no      | Homo_sapiens | CACC    | 4      | 15889141         | RRM          | 2.274 1.891   | 2.547       | assay                                                                                                                                                                      |  |
| HNRNPL                                                                                                                                                                                      | ENSG00000104824 | no      | Homo_sapiens | CCAC    | 4      | 15889141         | RRM          | 2.234 1.983   | 2.489       | SELEX of 50nt random with recombinant protein. Consensus motif: u/aCCCCCu/a. Winners                                                                                       |  |
| KHSRP                                                                                                                                                                                       | ENSG00000088247 | no      | Homo_sapiens | UGGG    | 4      | 18684992         | KH           | 1.307 1.673   | 1.617       | confirmed by EMSA with recombinant protein.                                                                                                                                |  |
| MBNL1                                                                                                                                                                                       | ENSG00000152601 | no      | Homo_sapiens | AUGCCA  | 6      | 20071745         | ZF_CCCH      | 5.951 5.383   | 5.918       | Pull-down assays; UV crosslink; immunoprecipitation with HeLa nuclear extracts.                                                                                            |  |
| MBNL1                                                                                                                                                                                       | ENSG00000152601 | no      | Homo_sapiens | UGCC    | 4      | 20071745         | ZF_CCCH      | 28126 1.627   | 2.028       | SELEX of 20nt random with recombinant protein. Consensus motif: ACACACAC. Pull-down                                                                                        |  |
| MBNL1                                                                                                                                                                                       | ENSG00000152601 | no      | Homo_sapiens | CUGCCA  | 6      | 20071745         | ZF_CCCH      | 5.595 5.176   | 6.068       | assays;UV crosslink; immunoprecipitation with HeLa nuclear extracts.                                                                                                       |  |
| NOVA1                                                                                                                                                                                       | ENSG00000139910 | no      | Homo_sapiens | CCAG    | 4      | 17655233         | KH           | 46753 0.97    | 1.644       | SELEX of 32nt random with recombinant protein. Consensus motifs: YGCV YYYGCUKY.                                                                                            |  |
| NOVA1                                                                                                                                                                                       | ENSG00000139910 | no      | Homo_sapiens | ACCACC  | 6      | 10811881         | KH           | 6.286 5.518   | 6.567       | SELEX                                                                                                                                                                      |  |
| NOVA1                                                                                                                                                                                       | ENSG00000139910 | no      | Homo_sapiens | CCAC    | 4      | 17655233         | KH           | 2.234 1.983   | 2.489       | SELEX of 32nt random with recombinant protein. Consensus motifs: YGCV YYYGCUKY.                                                                                            |  |
| NOVA1                                                                                                                                                                                       | ENSG00000139910 | no      | Homo_sapiens | CCAU    | 4      | 17655233         | KH           | 2.446 2.318   | 2.345       | NMR                                                                                                                                                                        |  |
| NOVA2                                                                                                                                                                                       | ENSG00000104967 | no      | Homo_sapiens | ACCACC  | 6      | 10811881         | KH           | 6.286 5.518   | 6.567       | SELEX of 25nt random with recombinant protein. Consensus motif: UCAY. EMSA and Filter Binding                                                                              |  |
| NUDT21                                                                                                                                                                                      | ENSG00000167005 | no      | Homo_sapiens | UGUA    | 4      | 21295486         | NUDIX_2      | 3.526 4.268   | 3.098       | Assay with recombinant protein.                                                                                                                                            |  |
| NUDT21                                                                                                                                                                                      | ENSG00000167005 | no      | Homo_sapiens | UUGUA   | 5      | 20479262         | NUDIX_2      | 4.374 5.589   | 3.841       | NMR                                                                                                                                                                        |  |
| NUDT21                                                                                                                                                                                      | ENSG00000167005 | no      | Homo_sapiens | UUGUA   | 5      | 21295486         | NUDIX_2      | 4.374 5.589   | 3.841       | SELEX of 25nt random with recombinant protein. Consensus motif: UCAY. EMSA and Filter Binding                                                                              |  |
| NUDT21                                                                                                                                                                                      | ENSG00000167005 | no      | Homo_sapiens | UUGUA   | 5      | 21295486         | NUDIX_2      | 4.374 5.589   | 3.841       | Assay with recombinant protein.                                                                                                                                            |  |
| NUDT21                                                                                                                                                                                      | ENSG00000167005 | no      | Homo_sapiens | UUGUA   | 5      | 21295486         | NUDIX_2      | 4.374 5.589   | 3.841       | X-RAY DIFFRACTION                                                                                                                                                          |  |
| NUDT21                                                                                                                                                                                      | ENSG00000167005 | no      | Homo_sapiens | UUGUA   | 5      | 21295486         | NUDIX_2      | 4.374 5.589   | 3.841       | X-RAY DIFFRACTION                                                                                                                                                          |  |
| NUDT21                                                                                                                                                                                      | ENSG00000167005 | no      | Homo_sapiens | UUGUA   | 5      | 21295486         | NUDIX_2      | 4.374 5.589   | 3.841       | X-RAY DIFFRACTION                                                                                                                                                          |  |



|                                                                                                                                                                                                                                               |                 |    |              |               |   |          |                           |       |       |       |                   |                                                                                                                                                                                                                                    |
|-----------------------------------------------------------------------------------------------------------------------------------------------------------------------------------------------------------------------------------------------|-----------------|----|--------------|---------------|---|----------|---------------------------|-------|-------|-------|-------------------|------------------------------------------------------------------------------------------------------------------------------------------------------------------------------------------------------------------------------------|
| NXF1                                                                                                                                                                                                                                          | ENSG00000162231 | no | Homo_sapiens | AGAC          | 4 | 21822283 | LRR_1;NTF2;TAP-RNA_BINC45 | 12086 | 1.992 | 2.334 | X-RAY DIFFRACTION |                                                                                                                                                                                                                                    |
| NXF1                                                                                                                                                                                                                                          | ENSG00000162231 | no | Homo_sapiens | CCUG          | 4 | 21822283 | LRR_1;NTF2;TAP-RNA_BINC34 | 41640 | 0.951 | 1.558 | X-RAY DIFFRACTION |                                                                                                                                                                                                                                    |
| PTBP1                                                                                                                                                                                                                                         | ENSG00000011304 | no | Homo_sapiens | CUGA          | 4 | 16179478 | RRM                       | 35    | 1.689 | 1.522 | 1.816             | NMR                                                                                                                                                                                                                                |
| PTBP1                                                                                                                                                                                                                                         | ENSG00000011304 | no | Homo_sapiens | CUAU          | 4 | 16179478 | RRM                       | 22    | 28522 | 2.877 | 2.397             | NMR                                                                                                                                                                                                                                |
| PTBP1                                                                                                                                                                                                                                         | ENSG00000011304 | no | Homo_sapiens | CUCC          | 4 | 16179478 | RRM                       | 51    | 1.473 | 1.548 | 1.803             | NMR                                                                                                                                                                                                                                |
| PTBP1                                                                                                                                                                                                                                         | ENSG00000011304 | no | Homo_sapiens | CUUG          | 4 | 16179478 | RRM                       | 54    | 1.971 | 2.343 | 1.894             | NMR                                                                                                                                                                                                                                |
| PTBP1                                                                                                                                                                                                                                         | ENSG00000011304 | no | Homo_sapiens | CCUGA         | 5 | 16179478 | RRM                       | 34    | 3.506 | 3.242 | 3.751             | NMR                                                                                                                                                                                                                                |
| PTBP1                                                                                                                                                                                                                                         | ENSG00000011304 | no | Homo_sapiens | UCUAU         | 5 | 16179478 | RRM                       | 21    | 4.513 | 4.904 | 4.019             | NMR                                                                                                                                                                                                                                |
| PTBP1                                                                                                                                                                                                                                         | ENSG00000011304 | no | Homo_sapiens | UCUCC         | 5 | 16179478 | RRM                       | 50    | 3.374 | 24167 | 3.617             | NMR                                                                                                                                                                                                                                |
| PTBP1                                                                                                                                                                                                                                         | ENSG00000011304 | no | Homo_sapiens | CCUUG         | 5 | 16179478 | RRM                       | 53    | 3.791 | 4.075 | 3.945             | NMR                                                                                                                                                                                                                                |
| PTBP1                                                                                                                                                                                                                                         | ENSG00000011304 | no | Homo_sapiens | CUGC          | 4 | 16179478 | RRM                       | 7     | 1.774 | 1.433 | 2.265             | NMR                                                                                                                                                                                                                                |
| PTBP1                                                                                                                                                                                                                                         | ENSG00000011304 | no | Homo_sapiens | UCUGC         | 5 | 16179478 | RRM                       | 6     | 3.885 | 3.898 | 4.123             | NMR                                                                                                                                                                                                                                |
| RBM28                                                                                                                                                                                                                                         | ENSG00000106344 | no | Homo_sapiens | GUGUAGA       | 7 | 23846655 | RRM                       | 24    | 9.151 | 32387 | 8.844             | RNAcompete                                                                                                                                                                                                                         |
| RC3H1                                                                                                                                                                                                                                         | ENSG00000135870 | no | Homo_sapiens | UUUC          | 4 | 25026078 | ZF_CCCH                   | 18    | 1.705 | 2.665 | 1.465             | X-RAY DIFFRACTION                                                                                                                                                                                                                  |
| SRP14                                                                                                                                                                                                                                         | ENSG00000140319 | no | Homo_sapiens | GUGG          | 4 | 11089964 | SRP14                     | 4     | 1.614 | 1.477 | 1.974             | X-RAY DIFFRACTION                                                                                                                                                                                                                  |
| SELEX of random 20nt with recombinant protein. Consensus motifs: RGAAGAAC. Confirmed by EMSA competition assay with recombinant protein and SELEX winners. UV-crosslinking and immunoprecipitation with HeLa nuclear extract or S100 extract. |                 |    |              |               |   |          |                           |       |       |       |                   |                                                                                                                                                                                                                                    |
| SRSF1                                                                                                                                                                                                                                         | ENSG00000136450 | no | Homo_sapiens | GGAAAGAC ; AC | 8 | 7543047  | RRM                       | 41    | 9.789 | 9.188 | 9.935             | genome-wide in vivo immunoprecipitation                                                                                                                                                                                            |
| SRSF1                                                                                                                                                                                                                                         | ENSG00000136450 | no | Homo_sapiens | UGGUGAU       | 7 | 18841201 | RRM                       | 5     | 7.788 | 7.327 | 7.664             | SELEX                                                                                                                                                                                                                              |
| SRSF1                                                                                                                                                                                                                                         | ENSG00000136450 | no | Homo_sapiens | CCACCCA       | 7 | 16825284 | RRM                       | 38    | 7.396 | 7.361 | 7.838             | SOLUTION NMR                                                                                                                                                                                                                       |
| SRSF2                                                                                                                                                                                                                                         | ENSG00000161547 | no | Homo_sapiens | UCCAGU        | 6 | 22002536 | RRM                       | 20    | 6.187 | 5.866 | 44348             | NMR spectroscopy                                                                                                                                                                                                                   |
| SRSF3                                                                                                                                                                                                                                         | ENSG00000112081 | no | Homo_sapiens | GAUC          | 4 | 17036044 | RRM                       | 19    | 2.884 | 2.436 | 2.799             | Functional SELEX of constructs with 20nt random by splicing in HeLa S100 extracts complemented by recombinant protein. Consensus motif: USCGKM. UV crosslink; competition and immunoprecipitation assays in HeLa nuclear extracts. |
| SRSF6                                                                                                                                                                                                                                         | ENSG00000124193 | no | Homo_sapiens | GACGUC        | 6 | 9649504  | RRM                       | 46    | 8.131 | 46935 | 20699             | SELEX of 20nt random with recombinant protein. Consensus motif: AGGAC. EMSA; UV crosslink; SDS-PAGE with HeLa nuclear extracts.                                                                                                    |
| SRSF9                                                                                                                                                                                                                                         | ENSG00000111786 | no | Homo_sapiens | AAGAC         | 5 | 17548433 | RRM                       | 44    | 4.241 | 24167 | 4.223             | SELEX of 20nt random with recombinant protein. Consensus motif: AGGAC. EMSA; UV crosslink; SDS-PAGE with HeLa nuclear extracts.                                                                                                    |
| SRSF9                                                                                                                                                                                                                                         | ENSG00000111786 | no | Homo_sapiens | UGGAC         | 5 | 17548433 | RRM                       | 14    | 43556 | 3.362 | 4.762             | SELEX of 20nt random with recombinant protein. Consensus motif: AGGAC. EMSA; UV crosslink; SDS-PAGE with HeLa nuclear extracts.                                                                                                    |
| SRSF9                                                                                                                                                                                                                                         | ENSG00000111786 | no | Homo_sapiens | ACCAC         | 5 | 17548433 | RRM                       | 37    | 4.622 | 4.098 | 4.567             | SELEX of 20nt random with recombinant protein. Consensus motif: AGGAC. EMSA; UV crosslink; SDS-PAGE with HeLa nuclear extracts.                                                                                                    |
| SSB                                                                                                                                                                                                                                           | ENSG00000138385 | no | Homo_sapiens | AUUU          | 4 | 18547518 | LA;RRM                    | 30    | 1.525 | 2.659 | 1.034             | X-RAY DIFFRACTION                                                                                                                                                                                                                  |
| SSB                                                                                                                                                                                                                                           | ENSG00000138385 | no | Homo_sapiens | UUUU          | 4 | 18547518 | LA;RRM                    | 31    | 0.793 | 2.648 | 0.257             | X-RAY DIFFRACTION                                                                                                                                                                                                                  |
| TIA1                                                                                                                                                                                                                                          | ENSG00000116001 | no | Homo_sapiens | AUUUUG        | 6 | 8576255  | RRM                       | 30    | 5.312 | 6.165 | 4.879             | SELEX of 68nt random with recombinant protein. Winners confirmed by UV cross-linking and competition assay.                                                                                                                        |
| TIA1                                                                                                                                                                                                                                          | ENSG00000116001 | no | Homo_sapiens | GUUUC         | 5 | 8576255  | RRM                       | 17    | 4.264 | 4.956 | 4.043             | SELEX of 68nt random with recombinant protein. Winners confirmed by UV cross-linking and competition assay.                                                                                                                        |
| TIAL1                                                                                                                                                                                                                                         | ENSG00000151923 | no | Homo_sapiens | AUUA          | 4 | 8576255  | RRM                       | 10    | 2.189 | 3.027 | 43983             | SELEX of 68nt random with recombinant protein. Winners confirmed by UV cross-linking and competition assay.                                                                                                                        |
| TIAL1                                                                                                                                                                                                                                         | ENSG00000151923 | no | Homo_sapiens | AUUUUG        | 6 | 8576255  | RRM                       | 30    | 5.312 | 6.165 | 4.879             | SELEX of 68nt random with recombinant protein. Winners confirmed by UV cross-linking and competition assay.                                                                                                                        |
| TIAL1                                                                                                                                                                                                                                         | ENSG00000151923 | no | Homo_sapiens | GUUUC         | 5 | 8576255  | RRM                       | 17    | 4.264 | 4.956 | 4.043             | SELEX of 68nt random with recombinant protein. Winners confirmed by UV cross-linking and competition assay.                                                                                                                        |
| TRA2B                                                                                                                                                                                                                                         | ENSG00000136527 | no | Homo_sapiens | AGAA          | 4 | 20926394 | RRM                       | 29    | 1.416 | 0.95  | 1.343             | SOLUTION NMR                                                                                                                                                                                                                       |
| XPO5                                                                                                                                                                                                                                          | ENSG00000124571 | no | Homo_sapiens | GUUU          | 4 | 19965479 | XPO1                      | 17    | 2.063 | 2.959 | 1.767             | X-RAY DIFFRACTION                                                                                                                                                                                                                  |
| YBX1                                                                                                                                                                                                                                          | ENSG00000065978 | no | Homo_sapiens | GAUC          | 4 | 22730292 | CSD                       | 19    | 2.884 | 2.436 | 2.799             | EMSA with recombinant protein.                                                                                                                                                                                                     |
| YBX1                                                                                                                                                                                                                                          | ENSG00000065978 | no | Homo_sapiens | CACC          | 4 | 22730292 | CSD                       | 39    | 2.274 | 1.891 | 2.547             | SELEX of 20nt random sequences with recombinant protein. Winners confirmed by EMSA with recombinant protein.                                                                                                                       |
| ZFP36                                                                                                                                                                                                                                         | ENSG00000128016 | no | Homo_sapiens | CUUGU         | 5 | 18367721 | ZF_CCCH                   | 54    | 4.043 | 4.714 | 3.905             | RIP-chip                                                                                                                                                                                                                           |
| ZFP36                                                                                                                                                                                                                                         | ENSG00000128016 | no | Homo_sapiens | CCUUGU        | 6 | 18367721 | ZF_CCCH                   | 53    | 5.897 | 6.443 | 5.902             | RIP-chip                                                                                                                                                                                                                           |
| ZFP36                                                                                                                                                                                                                                         | ENSG00000128016 | no | Homo_sapiens | CUUGU         | 5 | 18367721 | ZF_CCCH                   | 1     | 4.358 | 43895 | 44652             | RIP-chip                                                                                                                                                                                                                           |
| ZNF346                                                                                                                                                                                                                                        | ENSG00000113761 | no | Homo_sapiens | GUGGU         | 5 | 24521053 | ZF_C2H2                   | 4     | 3.946 | 3.857 | 3.948             | SOLUTION NMR                                                                                                                                                                                                                       |
| ZNF346                                                                                                                                                                                                                                        | ENSG00000113761 | no | Homo_sapiens | CCACC         | 5 | 24521053 | ZF_C2H2                   | 38    | 27089 | 3.427 | 43986             | SOLUTION NMR                                                                                                                                                                                                                       |

| SL4765-4802                           |                 |         |              |       |        |           |     |        |       |               |       | apical loop - marked in red                                                                |  |  |  |  |  |  |  |  |  |  |  |
|---------------------------------------|-----------------|---------|--------------|-------|--------|-----------|-----|--------|-------|---------------|-------|--------------------------------------------------------------------------------------------|--|--|--|--|--|--|--|--|--|--|--|
| GGAGAUUUCACUUUGACAUGAACUUGAGGUUUUUUCC |                 |         |              |       |        |           |     |        |       |               |       |                                                                                            |  |  |  |  |  |  |  |  |  |  |  |
| Gene name                             | Gene id         | Mutated | Organism     | Motif | Length | Reference |     | Domain |       | Quality_score |       | Experiments                                                                                |  |  |  |  |  |  |  |  |  |  |  |
| CELF2                                 | ENSG00000048740 | no      | Homo_sapiens | CAUCG | 5      | 15657417  | RRM | 22     | 6.664 | 5.325         | 7.905 | SELEX of 20nt random with recombinant protein; some winner sequences are verified by EMSA. |  |  |  |  |  |  |  |  |  |  |  |
| ELAVL1                                | ENSG00000066044 | no      | Homo_sapiens | AUUU  | 4      | 23519412  | RRM | 4;32   | 2.919 | 4.053         | 2.428 | X-RAY DIFFRACTION                                                                          |  |  |  |  |  |  |  |  |  |  |  |
| ELAVL2                                | ENSG00000107105 | no      | Homo_sapiens | AUUUC | 5      | 8497264   | RRM | 4;32   | 5.336 | 6.076         | 4.958 | SELEX of 25nt random with recombinant protein.                                             |  |  |  |  |  |  |  |  |  |  |  |
| ELAVL4                                | ENSG00000162374 | no      | Homo_sapiens | AUUU  | 4      | 11175903  | RRM | 4;32   | 2.919 | 4.053         | 2.428 | X-RAY DIFFRACTION                                                                          |  |  |  |  |  |  |  |  |  |  |  |

|        |                 |    |              |          |   |          |                     |       |        |       |        |                                                                                                                                                           |
|--------|-----------------|----|--------------|----------|---|----------|---------------------|-------|--------|-------|--------|-----------------------------------------------------------------------------------------------------------------------------------------------------------|
| HNRNPL | ENSG00000104824 | no | Homo_sapiens | AACA     | 4 | 15889141 | RRM                 | 20    | 2.752  | 2.528 | 17930  | SELEX of 20nt random with recombinant protein. Consensus motif: ACACACAC. Pull-down assays; UV crosslink; immunoprecipitation with HeLa nuclear extracts. |
| HNRNPL | ENSG00000104824 | no | Homo_sapiens | ACAU     | 4 | 15889141 | RRM                 | 21;15 | 32568  | 3.917 | 3.545  | SELEX of 20nt random with recombinant protein. Consensus motif: ACACACAC. Pull-down assays; UV crosslink; immunoprecipitation with HeLa nuclear extracts. |
| NOVA1  | ENSG00000139910 | no | Homo_sapiens | UCAC     | 4 | 10811881 | KH                  | 7     | 34731  | 2.948 | 2.822  | SELEX                                                                                                                                                     |
| NOVA1  | ENSG00000139910 | no | Homo_sapiens | UCAC     | 4 | 17655233 | KH                  | 7     | 34731  | 2.948 | 2.822  | NMR                                                                                                                                                       |
| NOVA2  | ENSG00000104967 | no | Homo_sapiens | UCAC     | 4 | 10811881 | KH                  | 7     | 34731  | 2.948 | 2.822  | SELEX                                                                                                                                                     |
| OAS1   | ENSG00000089127 | no | Homo_sapiens | UUGA     | 4 | 23319625 | OAS1_C;NTP_TRANSF_2 | 12    | 25965  | 2.923 | 2.367  | X-RAY DIFFRACTION                                                                                                                                         |
| PHAX   | ENSG00000164902 | no | Homo_sapiens | AUCG     | 4 | 20430857 | RNA_GG_BIND         | 23    | 5.253  | 4.219 | 5.818  | SOLUTION NMR                                                                                                                                              |
| PIIE   | ENSG00000084072 | no | Homo_sapiens | UUUUUU   | 6 | 18258190 | RRM;PRO_ISOMERASE   | 30    | 4.984  | 11505 | 4.426  | single RNA affinity purification                                                                                                                          |
| PTBP1  | ENSG00000011304 | no | Homo_sapiens | CUUU     | 4 | 16179478 | RRM                 | 10    | 2.068  | 2.839 | 1.855  | NMR                                                                                                                                                       |
| RC3H1  | ENSG00000135870 | no | Homo_sapiens | UUUC     | 4 | 25026078 | ZF_CCCH             | 5;33  | 3.099  | 43986 | 2.859  | X-RAY DIFFRACTION                                                                                                                                         |
| SRP54  | ENSG00000100883 | no | Homo_sapiens | AGGU     | 4 | 12244299 | SRP54; SRP_SPB      | 27    | 2.625  | 3.081 | 2.806  | X-RAY DIFFRACTION                                                                                                                                         |
| SRSF2  | ENSG00000161547 | no | Homo_sapiens | GGAGAU   | 6 | 23846655 | RRM                 | 0     | 6.542  | 5.844 | 6.707  | RNAcompete                                                                                                                                                |
| SRSF3  | ENSG00000112081 | no | Homo_sapiens | CAUC     | 4 | 17036044 | RRM                 | 22    | 2.921  | 2.375 | 3.082  | NMR spectroscopy                                                                                                                                          |
| SRSF3  | ENSG00000112081 | no | Homo_sapiens | UUCAC    | 5 | 17036044 | RRM                 | 6     | 4.889  | 4.967 | 4.628  | NMR spectroscopy                                                                                                                                          |
| SRSF9  | ENSG00000111786 | no | Homo_sapiens | AUGAACAA | 7 | 23846655 | RRM                 | 17    | 8.575  | 8.015 | 8.303  | RNAcompete                                                                                                                                                |
| SSB    | ENSG00000138385 | no | Homo_sapiens | AUUU     | 4 | 18547518 | LA;RRM              | 4;32  | 2.919  | 4.053 | 2.428  | X-RAY DIFFRACTION                                                                                                                                         |
| TIA1   | ENSG00000116001 | no | Homo_sapiens | AUUUC    | 5 | 8576255  | RRM                 | 4;32  | 5.336  | 6.076 | 4.958  | SELEX of 68nt random with recombinant protein. Winners confirmed by UV cross-linking and competition assay.                                               |
| TIA1   | ENSG00000116001 | no | Homo_sapiens | CUUUG    | 5 | 8576255  | RRM                 | 10    | 4.129  | 4.321 | 4.028  | SELEX of 68nt random with recombinant protein. Winners confirmed by UV cross-linking and competition assay.                                               |
| TIAL1  | ENSG00000151923 | no | Homo_sapiens | AUUUC    | 5 | 8576255  | RRM                 | 4;32  | 5.336  | 6.076 | 4.958  | SELEX of 68nt random with recombinant protein. Winners confirmed by UV cross-linking and competition assay.                                               |
| TIAL1  | ENSG00000151923 | no | Homo_sapiens | CUUUG    | 5 | 8576255  | RRM                 | 10    | 4.129  | 4.321 | 4.028  | SELEX of 68nt random with recombinant protein. Winners confirmed by UV cross-linking and competition assay.                                               |
| YBX1   | ENSG00000065978 | no | Homo_sapiens | AACAUC   | 6 | 23846655 | CSD                 | 20    | 7.056  | 6.348 | 7.057  | RNAcompete                                                                                                                                                |
| YBX1   | ENSG00000065978 | no | Homo_sapiens | AACAUCG  | 7 | 23846655 | CSD                 | 20    | 10.956 | 19603 | 11.775 | RNAcompete                                                                                                                                                |
| YBX1   | ENSG00000065978 | no | Homo_sapiens | CAUC     | 4 | 22730292 | CSD                 | 22    | 2.921  | 2.375 | 3.082  | In vivo splicing in HEK-293 cells with wt and mutated sequences; EMSA                                                                                     |
| YBX1   | ENSG00000065978 | no | Homo_sapiens | CAUC     | 4 | 22730292 | CSD                 | 22    | 2.921  | 2.375 | 3.082  | SELEX of 20nt random sequences with recombinant protein. Winners confirmed by EMSA with recombinant protein.                                              |
| YBX2   | ENSG00000006047 | no | Homo_sapiens | AACAUCG  | 7 | 23846655 | CSD                 | 20    | 10.956 | 19603 | 11.775 | RNAcompete                                                                                                                                                |
| ZRANB2 | ENSG00000132485 | no | Homo_sapiens | AGGUUA   | 6 | 19304800 | ZF_RANBP            | 27    | 7.468  | 8.157 | 7.154  | SELEX of 25nt random with recombinant protein. Consensus motifs: CAGGUAA and AAGGUAA. Fluorescence anisotropy.                                            |
| ZRANB2 | ENSG00000132485 | no | Homo_sapiens | GAGGUU   | 6 | 19304800 | ZF_RANBP            | 26    | 6.836  | 7.305 | 6.454  | SELEX of 25nt random with recombinant protein. Consensus motifs: CAGGUAA and AAGGUAA.                                                                     |
| NOVA1  | ENSG00000139910 | no | Homo_sapiens | UCAC     | 4 | 15367696 | KH                  | 7     | 34731  | 2.948 | 2.822  | RNA affinity binding assays                                                                                                                               |

>SL6236-6260 apical loop - marked in red  
GGCGCUUGAUCUAACAAACGAGUGCC

| Gene name | Gene id         | Mutated | Organism     | Motif   | Length | Reference | Domain                   | Quality_score        | Experiments                                                                                                                                               |
|-----------|-----------------|---------|--------------|---------|--------|-----------|--------------------------|----------------------|-----------------------------------------------------------------------------------------------------------------------------------------------------------|
| ADAR      | ENSG00000160710 | no      | Homo_sapiens | GCGC    | 4      | 17437712  | A_DEAMIN;DSRM;Z-ALPHA 1  | 4.668 4.251 6.201    | X-RAY DIFFRACTION                                                                                                                                         |
| CMTR1     | ENSG00000137200 | no      | Homo_sapiens | GAUC    | 4      | 24402442  | FTSJ;G-PATCH 7           | 4.258 3.809 4.172    | X-RAY DIFFRACTION                                                                                                                                         |
| DDX58     | ENSG00000107201 | no      | Homo_sapiens | GCGC    | 4      | 20961956  | DEAD 0                   | 4.272 4.063 5.425    | X-RAY DIFFRACTION                                                                                                                                         |
| DHX9      | ENSG00000135829 | no      | Homo_sapiens | GCGC    | 4      | 23361462  | DEAD;DSRM;HA2;HELICASE 1 | 4.668 4.251 6.201    | X-RAY DIFFRACTION                                                                                                                                         |
| HNRNPL    | ENSG00000104824 | no      | Homo_sapiens | AACA    | 4      | 15889141  | RRM 12                   | 3.422 3.198 42430    | SELEX of 20nt random with recombinant protein. Consensus motif: ACACACAC. Pull-down assays, UV crosslink, immunoprecipitation with HeLa nuclear extracts. |
| HNRNPL    | ENSG00000104824 | no      | Homo_sapiens | ACAA    | 4      | 15889141  | RRM 13                   | 3.634 3.242 3.354    | Pull-down assays, UV crosslink, immunoprecipitation with HeLa nuclear extracts.                                                                           |
| MBNL1     | ENSG00000152601 | no      | Homo_sapiens | GCGCUU  | 6      | 20071745  | ZF_CCCH 1                | 9.344 8.761 10.626   | SELEX of 32nt random with recombinant protein. Consensus motifs: YGCV, YYYGCUKY.                                                                          |
| MBNL1     | ENSG00000152601 | no      | Homo_sapiens | UGCC    | 4      | 20071745  | ZF_CCCH 21               | 3.143 3.0 3.402      | SELEX                                                                                                                                                     |
| MBNL1     | ENSG00000152601 | no      | Homo_sapiens | CGCU    | 4      | 20071745  | ZF_CCCH 2                | 5.0 4.398 6.154      | SELEX                                                                                                                                                     |
| OAS1      | ENSG00000089127 | no      | Homo_sapiens | UUGA    | 4      | 23319625  | OAS1_C;NTP_TRANSF_2 5    | 13940 3.593 3.037    | X-RAY DIFFRACTION                                                                                                                                         |
| PIWIL1    | ENSG00000125207 | no      | Homo_sapiens | GCUU    | 4      | 21193640  | GAGE;PAZ;PIWI 3          | 3.496 44015 19054    | X-RAY DIFFRACTION                                                                                                                                         |
| PTBP1     | ENSG00000011304 | no      | Homo_sapiens | CUAA    | 4      | 16179478  | RRM 10                   | 4.052 4.734 3.658    | NMR                                                                                                                                                       |
| PTBP1     | ENSG00000011304 | no      | Homo_sapiens | CUUG    | 4      | 16179478  | RRM 4                    | 3.345 3.716 3.267    | NMR                                                                                                                                                       |
| PTBP1     | ENSG00000011304 | no      | Homo_sapiens | UCUAA   | 5      | 16179478  | RRM 9                    | 5.838 6.778 5.441    | NMR                                                                                                                                                       |
| QKI       | ENSG00000112531 | yes     | Homo_sapiens | CGAGU   | 5      | 24722255  | KH 17                    | 7.504 24259 8.105    | EMSA with WT and mutated sequences and UV crosslinking with recombinant protein                                                                           |
| SRSF3     | ENSG00000112081 | no      | Homo_sapiens | GAUC    | 4      | 17036044  | RRM 7                    | 4.258 3.809 4.172    | NMR spectroscopy                                                                                                                                          |
| YBX1      | ENSG00000065978 | no      | Homo_sapiens | ACAAC   | 5      | 18503770  | CSD 13                   | 6.206 5.427 43617    | UV crosslink, EMSA, and pull-down assays with HeLa nuclear extracts.                                                                                      |
| YBX1      | ENSG00000065978 | no      | Homo_sapiens | GAUC    | 4      | 22730292  | CSD 7                    | 4.258 3.809 4.172    | EMSA with recombinant protein.                                                                                                                            |
| YBX2      | ENSG00000006047 | no      | Homo_sapiens | AACAACG | 7      | 23846655  | CSD 12                   | 11.826 10.503 12.554 | RNAcompete                                                                                                                                                |
| YTHDC1    | ENSG00000083896 | no      | Homo_sapiens | GAGUGC  | 6      | 20167602  | YTH 18                   | 7.532 7.553 7.341    | SELEX                                                                                                                                                     |



| SL6289-6308                 |                  |         |              |         |        |           |                         |               |       |             |
|-----------------------------|------------------|---------|--------------|---------|--------|-----------|-------------------------|---------------|-------|-------------|
| AGAAGAGGGGACAUCCUCUCU       |                  |         |              |         |        |           |                         |               |       |             |
| apical loop - marked in red |                  |         |              |         |        |           |                         |               |       |             |
| Gene name                   | Gene id          | Mutated | Organism     | Motif   | Length | Reference | Domain                  | Quality_score |       | Experiments |
| F2                          | ENSG000000180210 | no      | Homo_sapiens | GAAG    | 4      | 18971322  | GLA;KRINGLE;THROMBIN_L1 | 3.411         | 2.742 | 3.734       |
| GRSF1                       | ENSG000000132463 | no      | Homo_sapiens | AGGGA   | 5      | 17337441  | RRM                     | 5             | 5.285 | 5.689       |
| HNRNPF                      | ENSG000000169813 | no      | Homo_sapiens | AGGGA   | 5      | 11571276  | RRM;ZF_RNPHF            | 5             | 5.285 | 5.689       |
| HNRNPF                      | ENSG000000169813 | no      | Homo_sapiens | AGGGA   | 5      | 17337441  | RRM;ZF_RNPHF            | 5             | 5.285 | 5.689       |
| HNRNPF                      | ENSG000000169813 | no      | Homo_sapiens | AGGGA   | 5      | 17337441  | RRM;ZF_RNPHF            | 5             | 5.285 | 5.689       |
| HNRNPF                      | ENSG000000169813 | yes     | Homo_sapiens | AGGGA   | 5      | 19404736  | RRM;ZF_RNPHF            | 5             | 5.285 | 5.689       |
| HNRNPH1                     | ENSG000000169045 | no      | Homo_sapiens | AGAGG   | 5      | 17337441  | ZF_RNPHF                | 3             | 5.171 | 5.035       |
| HNRNPH1                     | ENSG000000169045 | no      | Homo_sapiens | AGGGA   | 5      | 20028692  | ZF_RNPHF                | 5             | 5.285 | 5.689       |
| HNRNPH1                     | ENSG000000169045 | no      | Homo_sapiens | AGGGA   | 5      | 11571276  | ZF_RNPHF                | 5             | 5.285 | 5.689       |
| HNRNPH1                     | ENSG000000169045 | no      | Homo_sapiens | AGGGA   | 5      | 17337441  | ZF_RNPHF                | 5             | 5.285 | 5.689       |
| HNRNPH1                     | ENSG000000169045 | no      | Homo_sapiens | AGGGA   | 5      | 17337441  | ZF_RNPHF                | 5             | 5.285 | 5.689       |
| HNRNPH1                     | ENSG000000169045 | yes     | Homo_sapiens | AGGGA   | 5      | 19404736  | ZF_RNPHF                | 5             | 5.285 | 5.689       |
| HNRNPH2                     | ENSG000000126945 | no      | Homo_sapiens | AGAGG   | 5      | 17337441  | ZF_RNPHF                | 3             | 5.171 | 5.035       |
| HNRNPH2                     | ENSG000000126945 | no      | Homo_sapiens | AGGGA   | 5      | 20028692  | ZF_RNPHF                | 5             | 5.285 | 5.689       |
| HNRNPH2                     | ENSG000000126945 | no      | Homo_sapiens | AGGGA   | 5      | 11571276  | ZF_RNPHF                | 5             | 5.285 | 5.689       |
| HNRNPH2                     | ENSG000000126945 | no      | Homo_sapiens | AGGGA   | 5      | 17337441  | ZF_RNPHF                | 5             | 5.285 | 5.689       |
| HNRNPH2                     | ENSG000000126945 | no      | Homo_sapiens | AGGGA   | 5      | 17337441  | ZF_RNPHF                | 5             | 5.285 | 5.689       |
| HNRNPH2                     | ENSG000000126945 | yes     | Homo_sapiens | AGGGA   | 5      | 19404736  | ZF_RNPHF                | 5             | 5.285 | 5.689       |
| HNRNPH3                     | ENSG000000096746 | no      | Homo_sapiens | AGGGA   | 5      | 20028692  | RRM                     | 5             | 5.285 | 5.689       |
| HNRNPH3                     | ENSG000000096746 | no      | Homo_sapiens | AGGGA   | 5      | 11571276  | RRM                     | 5             | 5.285 | 5.689       |
| HNRNPH3                     | ENSG000000096746 | no      | Homo_sapiens | AGGGA   | 5      | 17337441  | RRM                     | 5             | 5.285 | 5.689       |
| HNRNPH3                     | ENSG000000096746 | no      | Homo_sapiens | AGGGA   | 5      | 17337441  | RRM                     | 5             | 5.285 | 5.689       |
| HNRNPH3                     | ENSG000000096746 | yes     | Homo_sapiens | AGGGA   | 5      | 19404736  | RRM                     | 5             | 5.285 | 5.689       |
| HNRNPL                      | ENSG000000104824 | no      | Homo_sapiens | ACA     | 4      | 15889141  | RRM                     | 9             | 3.932 | 3.958       |
| KHSRP                       | ENSG000000088247 | no      | Homo_sapiens | AGGG    | 4      | 18684992  | KH                      | 5             | 3.392 | 3.853       |
| NONO                        | ENSG000000147140 | no      | Homo_sapiens | AGGGA   | 5      | 9001221   | RRM                     | 5             | 5.285 | 5.689       |
| PABPN1                      | ENSG000000100836 | no      | Homo_sapiens | AGAAGA  | 6      | 23846655  | RRM                     | 0             | 6.793 | 5.711       |
| PTBP1                       | ENSG000000011304 | no      | Homo_sapiens | CUCU    | 4      | 16179478  | RRM                     | 16;14         | 4.239 | 4.626       |
| PTBP1                       | ENSG000000011304 | no      | Homo_sapiens | CUCUC   | 5      | 19861426  | RRM                     | 14            | 5.239 | 5.778       |
| PTBP1                       | ENSG000000011304 | no      | Homo_sapiens | CUCUCU  | 6      | 10911989  | PTBP1                   | 14            | 6.719 | 7.722       |
| PTBP1                       | ENSG000000011304 | no      | Homo_sapiens | CUCUCU  | 6      | 11788707  | RRM                     | 14            | 6.719 | 7.722       |
| PTBP1                       | ENSG000000011304 | no      | Homo_sapiens | CUCUCU  | 6      | 16179478  | PTBP1                   | 14            | 6.719 | 7.722       |
| PTBP1                       | ENSG000000011304 | no      | Homo_sapiens | CUCUCU  | 6      | 11003644  | PTBP1                   | 14            | 6.719 | 7.722       |
| PTBP1                       | ENSG000000011304 | no      | Homo_sapiens | CUCUCU  | 6      | 16179478  | RRM                     | 14            | 6.719 | 7.722       |
| PTBP1                       | ENSG000000011304 | no      | Homo_sapiens | CUCUCU  | 6      | 9234723   | PTBP1                   | 14            | 6.719 | 7.722       |
| PTBP1                       | ENSG000000011304 | no      | Homo_sapiens | CUCU    | 4      | 16179478  | RRM                     | 16;14         | 4.239 | 4.626       |
| PTBP1                       | ENSG000000011304 | no      | Homo_sapiens | UCUCU   | 5      | 11788707  | PTBP1                   | 15            | 4.925 | 5.809       |
| PTBP1                       | ENSG000000011304 | no      | Homo_sapiens | UCUCU   | 5      | 11788707  | RRM                     | 15            | 4.925 | 5.809       |
| PTBP1                       | ENSG000000011304 | no      | Homo_sapiens | UCUCU   | 5      | 16179478  | RRM                     | 15            | 4.925 | 5.809       |
| PTBP1                       | ENSG000000011304 | no      | Homo_sapiens | CCUCU   | 5      | 16179478  | RRM                     | 13            | 44017 | 5.383       |
| PTBP1                       | ENSG000000011304 | no      | Homo_sapiens | UCUCU   | 5      | 16179478  | RRM                     | 15            | 4.925 | 5.809       |
| PTBP2                       | ENSG000000117569 | no      | Homo_sapiens | CUCUCU  | 6      | 11003644  | RRM                     | 14            | 6.719 | 7.722       |
| SRP19                       | ENSG000000153037 | no      | Homo_sapiens | CCUC    | 4      | 20179341  | SRP19                   | 13            | 3.219 | 3.298       |
| SRP54                       | ENSG000000100883 | no      | Homo_sapiens | CCUC    | 4      | 12244299  | SRP54,SRP_SPB           | 13            | 3.219 | 3.298       |
| SRP68                       | ENSG000000167881 | no      | Homo_sapiens | CCUC    | 4      | 24700861  | SRP68                   | 13            | 3.219 | 3.298       |
| SRSF10                      | ENSG000000188529 | no      | Homo_sapiens | AGAGGGA | 7      | 23846655  | RRM                     | 3             | 8.958 | 9.248       |
| SRSF2                       | ENSG000000161547 | yes     | Homo_sapiens | AGAAG   | 5      | 11847131  | RRM                     | 0             | 43956 | 44652       |
| SRSF3                       | ENSG000000112081 | no      | Homo_sapiens | CAUC    | 4      | 17036044  | RRM                     | 10            | 3.963 | 3.417       |

|         |                 |    |              |        |   |                  |          |    |       |       |       |                                                                                                                                                                                                                                   |
|---------|-----------------|----|--------------|--------|---|------------------|----------|----|-------|-------|-------|-----------------------------------------------------------------------------------------------------------------------------------------------------------------------------------------------------------------------------------|
| SRSF5   | ENSG00000100650 | no | Homo_sapiens | AGAGG  | 5 | 9649504          | RRM      | 3  | 5.171 | 5.035 | 19115 | Functional SELEX of constructs with 20nt random by splicing in HeLa S100 extracts complemented by recombinant protein. Consensus motif: ACDGS. UV crosslink, competition and immunoprecipitation assays in HeLa nuclear extracts. |
| TRA2B   | ENSG00000136527 | no | Homo_sapiens | AGAA   | 4 | 20926394         | RRM      | 0  | 3.162 | 2.695 | 3.088 | SOLUTION NMR                                                                                                                                                                                                                      |
| YBX1    | ENSG00000065978 | no | Homo_sapiens | CAUC   | 4 | 22730292         | CSD      | 10 | 3.963 | 3.417 | 4.124 | In vivo splicing in HEK-293 cells with wt and mutated sequences, EMSA                                                                                                                                                             |
| YBX1    | ENSG00000065978 | no | Homo_sapiens | CAUC   | 4 | 22730292         | CSD      | 10 | 3.963 | 3.417 | 4.124 | SELEX of 20nt random sequences with recombinant protein. Winners confirmed by EMSA with recombinant protein.                                                                                                                      |
| ZFP36   | ENSG00000128016 | no | Homo_sapiens | UCCUCU | 6 | 18367721         | ZF_CCCH  | 12 | 6.943 | 7.394 | 7.235 | RIP-chip                                                                                                                                                                                                                          |
| HNRNPH1 | ENSG00000169045 | no | Homo_sapiens | GGGA   | 4 | 11847131;9343212 | ZF_RNPHF | 6  | 3.344 | 3.529 | 3.691 | snRNA inactivation in HeLa cell nuclear extract;Western blot                                                                                                                                                                      |

>SL6376-6399 apical loop - marked in red

UGACUUAUGUAAAAGAUGAGCUCA

| Gene name | Gene id          | Mutated | Organism     | Motif   | Length | Reference | Domain                | Quality_score | Experiments       |                                                                                            |
|-----------|------------------|---------|--------------|---------|--------|-----------|-----------------------|---------------|-------------------|--------------------------------------------------------------------------------------------|
| CEL2      | ENSG000000048740 | no      | Homo_sapiens | UAUGU   | 5      | 15657417  | RRM                   | 5             | 5.516 6.376 5.066 | SELEX of 20nt random with recombinant protein, some winner sequences are verified by EMSA. |
| NUDT21    | ENSG000000167005 | no      | Homo_sapiens | UGUA    | 4      | 21295486  | NUDIX_2               | 7             | 3.657 4.399 3.229 |                                                                                            |
| PABPN1    | ENSG00000100836  | no      | Homo_sapiens | AAAAGA  | 6      | 23846655  | RRM                   | 10            | 6.466 6.226 6.044 | RNAcompete                                                                                 |
| PTBP1     | ENSG00000011304  | no      | Homo_sapiens | CUUA    | 4      | 16179478  | RRM                   | 3             | 3.943 4.659 3.631 | NMR                                                                                        |
| PTBP1     | ENSG00000011304  | no      | Homo_sapiens | CUCA    | 4      | 16179478  | RRM                   | 20            | 3.221 3.196 3.152 | NMR                                                                                        |
| QKI       | ENSG00000112531  | no      | Homo_sapiens | ACUUUAU | 6      | 24722255  | KH                    | 2             | 8.136 8.849 7.647 | EMSA with WT and mutated sequences with recombinant protein                                |
| RNASEL    | ENSG00000135828  | no      | Homo_sapiens | AAAA    | 4      | 24578532  | ANK;PKINASE;RIBONUC_2 | 10            | 2.379 2.811 1.833 |                                                                                            |
| SF1       | ENSG00000168066  | no      | Homo_sapiens | ACUUUAU | 6      | 24722255  | KH;ZF_CCHC            | 2             | 8.136 8.849 7.647 | UV crosslinking with recombinant protein                                                   |
| SRP19     | ENSG00000153037  | no      | Homo_sapiens | GAGC    | 4      | 11641499  | SRP19                 | 17            | 3.427 2.988 3.935 | X-RAY DIFFRACTION                                                                          |

>SL6476-6495 apical loop - marked in red

ACAGACAUUUGGUAAUCUGU

| Gene name | Gene id         | Mutated | Organism     | Motif  | Length | Reference | Domain                   | Quality_score | Experiments       |                                                                                                                                                           |
|-----------|-----------------|---------|--------------|--------|--------|-----------|--------------------------|---------------|-------------------|-----------------------------------------------------------------------------------------------------------------------------------------------------------|
| ELAVL1    | ENSG00000066044 | no      | Homo_sapiens | AUUU   | 4      | 23519412  | RRM                      | 6             | 2.961 4.095 17199 | X-RAY DIFFRACTION                                                                                                                                         |
| ELAVL2    | ENSG00000107105 | no      | Homo_sapiens | AUUUG  | 5      | 8497264   | RRM                      | 6             | 5.408 6.055 5.039 | SELEX of 25nt random with recombinant protein.                                                                                                            |
| ELAVL4    | ENSG00000162374 | no      | Homo_sapiens | AUUU   | 4      | 11175903  | RRM                      | 6             | 2.961 4.095 17199 | X-RAY DIFFRACTION                                                                                                                                         |
| HNRNPL    | ENSG00000104824 | no      | Homo_sapiens | ACAU   | 4      | 15889141  | RRM                      | 4             | 3.932 3.958 3.587 | SELEX of 20nt random with recombinant protein. Consensus motif: ACACACAC. Pull-down assays, UV crosslink, immunoprecipitation with HeLa nuclear extracts. |
| IGF2BP3   | ENSG00000136231 | no      | Homo_sapiens | CAUU   | 4      | 20371350  | KH;RRM                   | 5             | 3.665 44047 3.307 | PAR-clip                                                                                                                                                  |
| NXF1      | ENSG00000162231 | no      | Homo_sapiens | AGAC   | 4      | 21822283  | LRR_1;NTF2;TAP-RNA_BINC2 | 4             | 4.076 3.738 4.079 | X-RAY DIFFRACTION                                                                                                                                         |
| PTBP1     | ENSG00000011304 | no      | Homo_sapiens | CUGU   | 4      | 16179478  | RRM                      | 16            | 3.302 3.525 12114 | NMR                                                                                                                                                       |
| PTBP1     | ENSG00000011304 | no      | Homo_sapiens | UCUGU  | 5      | 16179478  | RRM                      | 15            | 44170 30072 4.958 | NMR                                                                                                                                                       |
| SSB       | ENSG00000138385 | no      | Homo_sapiens | AUUU   | 4      | 18547518  | LA;RRM                   | 6             | 2.961 4.095 17199 | X-RAY DIFFRACTION                                                                                                                                         |
| ZRANB2    | ENSG00000132485 | no      | Homo_sapiens | UGGUAA | 6      | 19304800  | ZF_RANBP                 | 9             | 35977 9.036 8.0   | SELEX of 25nt random with recombinant protein. Consensus motifs: CAGGUAA and AAGGUAA.                                                                     |

>SL6581-6597 apical loop - marked in red

GAUGUUAGAUGGACAUC

| Gene name | Gene id          | Mutated | Organism     | Motif    | Length | Reference               | Domain | Quality_score |        |        | Experiments |                                                                                                                                                                                                                                                                        |
|-----------|------------------|---------|--------------|----------|--------|-------------------------|--------|---------------|--------|--------|-------------|------------------------------------------------------------------------------------------------------------------------------------------------------------------------------------------------------------------------------------------------------------------------|
| CEL1      | ENSG000000149187 | no      | Homo_sapiens | UGUU     | 4      | 20947024                | RRM    | 2             | 3.643  | 4.416  | 3.363       | X-RAY DIFFRACTION                                                                                                                                                                                                                                                      |
| CEL2      | ENSG00000048740  | no      | Homo_sapiens | AUGUU    | 5      | 15657417                | RRM    | 1             | 5.822  | 6.404  | 5.437       | SELEX of 20nt random with recombinant protein, some winner sequences are verified by EMSA.                                                                                                                                                                             |
| CEL2      | ENSG00000048740  | no      | Homo_sapiens | UGUU     | 4      | PubMed ID is not availa | RRM    | 2             | 3.643  | 4.416  | 3.363       | X-RAY DIFFRACTION                                                                                                                                                                                                                                                      |
| HNRNPL    | ENSG00000104824  | no      | Homo_sapiens | ACAU     | 4      | 15889141                | RRM    | 12            | 4.212  | 4.239  | 3.867       | SELEX of 20nt random with recombinant protein. Consensus motif: ACACACAC. Pull-down assays, UV crosslink, immunoprecipitation with HeLa nuclear extracts.                                                                                                              |
| KHSRP     | ENSG000000088247 | no      | Homo_sapiens | UUAG     | 4      | 18684992                | KH     | 4             | 4.542  | 27515  | 4.057       | NMR                                                                                                                                                                                                                                                                    |
|           |                  |         |              |          |        |                         |        |               |        |        |             | SELEX of random 20nt with recombinant protein. Consensus motifs: RGAAGAAC, ACGCGCA and AGGACAGAGC. Confirmed by EMSA, competition assay with recombinant protein and SELEX winners. UV-crosslinking and immunoprecipitation with Hela nuclear extract or S100 extract. |
| SRSF1     | ENSG00000136450  | no      | Homo_sapiens | AGAUGGAC | 8      | 7543047                 | RRM    | 6             | 12.336 | 11.412 | 13.008      | NMR spectroscopy                                                                                                                                                                                                                                                       |
| SRSF3     | ENSG00000112081  | no      | Homo_sapiens | CAUC     | 4      | 17036044                | RRM    | 13            | 4.243  | 3.697  | 4.404       | SELEX of 20nt random with recombinant protein. Consensus motif: AGGAC. EMSA, UV crosslink, SDS-PAGE with HeLa nuclear extracts.                                                                                                                                        |
| SRSF9     | ENSG00000111786  | no      | Homo_sapiens | UGGAC    | 5      | 17548433                | RRM    | 9             | 6.297  | 5.469  | 6.869       | In vivo splicing in HEK-293 cells with wt and mutated sequences, EMSA                                                                                                                                                                                                  |
| YBX1      | ENSG000000065978 | no      | Homo_sapiens | CAUC     | 4      | 22730292                | CSD    | 13            | 4.243  | 3.697  | 4.404       | SELEX of 20nt random sequences with recombinant protein. Winners confirmed by EMSA with recombinant protein.                                                                                                                                                           |
| YBX1      | ENSG00000065978  | no      | Homo_sapiens | CAUC     | 4      | 22730292                | CSD    | 13            | 4.243  | 3.697  | 4.404       | In vitro splicing assays and RNA competition assays                                                                                                                                                                                                                    |
| SRSF2     | ENSG00000161547  | no      | Homo_sapiens | UUAG     | 4      | 10022872;9710624;762    | RRM    | 4             | 4.542  | 27515  | 4.057       | In vitro splicing assays and RNA competition assays                                                                                                                                                                                                                    |
| HNRNPA1   | ENSG00000135486  | no      | Homo_sapiens | UUAG     | 4      | 10022872;9710624;762    | RRM    | 4             | 4.542  | 27515  | 4.057       |                                                                                                                                                                                                                                                                        |

>SL6689-6722 apical loop - marked in red

GCACAAAGAGACAAACUACAUAUGACUACUUGUGC

| Gene name | Gene id         | Mutated | Organism     | Motif   | Length | Reference | Domain   | Quality_score | Experiments       |                                                                                  |
|-----------|-----------------|---------|--------------|---------|--------|-----------|----------|---------------|-------------------|----------------------------------------------------------------------------------|
| CEL1      | ENSG00000149187 | no      | Homo_sapiens | UUGUG   | 5      | 20947024  | RRM      | 28            | 4.675 5.085 4.515 | X-RAY DIFFRACTION                                                                |
| FXR2      | ENSG00000129245 | no      | Homo_sapiens | AGACAAA | 7      | 23846655  | KH       | 8             | 8.558 8.191 46235 | RNAcompete                                                                       |
| HNRNPH1   | ENSG00000169045 | no      | Homo_sapiens | AGAGA   | 5      | 17337441  | ZF_RNPHF | 6             | 4.243 36220 4.084 | RNA-affinity chromatography assays with HeLa nuclear extract and immunoblotting. |

|         |                  |    |              |         |   |          |                          |       |       |       |       |                                                                                                                                                           |
|---------|------------------|----|--------------|---------|---|----------|--------------------------|-------|-------|-------|-------|-----------------------------------------------------------------------------------------------------------------------------------------------------------|
| HNRNPH2 | ENSG00000126945  | no | Homo_sapiens | AGAGA   | 5 | 17337441 | ZF_RNPHF                 | 6     | 4.243 | 36220 | 4.084 | RNA-affinity chromatography assays with HeLa nuclear extract and immunoblotting.                                                                          |
| HNRNPL  | ENSG00000104824  | no | Homo_sapiens | ACAA    | 4 | 15889141 | RRM                      | 10;2  | 4.139 | 3.747 | 31472 | Pull-down assays, UV crosslink, immunoprecipitation with HeLa nuclear extracts.                                                                           |
| HNRNPL  | ENSG00000104824  | no | Homo_sapiens | ACAU    | 4 | 15889141 | RRM                      | 17    | 3.066 | 3.092 | 26330 | SELEX of 20nt random with recombinant protein. Consensus motif: ACACACAC. Pull-down assays, UV crosslink, immunoprecipitation with HeLa nuclear extracts. |
| HNRNPL  | ENSG00000104824  | no | Homo_sapiens | CACA    | 4 | 15889141 | RRM                      | 1     | 2.816 | 27426 | 27061 | SELEX of 20nt random with recombinant protein. Consensus motif: ACACACAC. Pull-down assays, UV crosslink, immunoprecipitation with HeLa nuclear extracts. |
| HNRNPL  | ENSG00000104824  | no | Homo_sapiens | GCAC    | 4 | 15889141 | RRM                      | 0     | 3.379 | 3.086 | 3.581 | SELEX of 20nt random with recombinant protein. Consensus motif: ACACACAC. Pull-down assays, UV crosslink, immunoprecipitation with HeLa nuclear extracts. |
| HNRNPL  | ENSG00000104824  | no | Homo_sapiens | UACA    | 4 | 15889141 | RRM                      | 16    | 3.282 | 3.233 | 2.885 | SELEX of 20nt random with recombinant protein. Consensus motif: ACACACAC. Pull-down assays, UV crosslink, immunoprecipitation with HeLa nuclear extracts. |
| IGF2BP3 | ENSG00000136231  | no | Homo_sapiens | CAUU    | 4 | 20371350 | KH;RRM                   | 18    | 2.799 | 3.213 | 16103 | PAR-clip                                                                                                                                                  |
| NXF1    | ENSG00000162231  | no | Homo_sapiens | AGAC    | 4 | 21822283 | LRR_1;NTF2;TAP-RNA_BINC8 | 3.209 | 2.871 | 3.212 |       | X-RAY DIFFRACTION                                                                                                                                         |
| OAS1    | ENSG00000089127  | no | Homo_sapiens | UUGA    | 4 | 23319625 | OAS1_C;NTP_TRANSF_2      | 20    | 2.885 | 3.098 | 2.542 | X-RAY DIFFRACTION                                                                                                                                         |
| PTBP1   | ENSG000000011304 | no | Homo_sapiens | CUAC    | 4 | 16179478 | RRM                      | 15;24 | 4.732 | 4.173 | 4.721 | NMR                                                                                                                                                       |
| PTBP1   | ENSG000000011304 | no | Homo_sapiens | CUUG    | 4 | 16179478 | RRM                      | 27    | 31079 | 3.221 | 2.773 | NMR                                                                                                                                                       |
| RBMY1A1 | ENSG00000234414  | no | Homo_sapiens | CACAA   | 5 | 17318228 | RRM                      | 1     | 5.312 | 4.987 | 5.078 | SELEX                                                                                                                                                     |
| SRSF10  | ENSG00000188529  | no | Homo_sapiens | AGACAA  | 6 | 18794844 | RRM                      | 8     | 6.988 | 18050 | 6.812 | EMSA                                                                                                                                                      |
| SRSF10  | ENSG00000188529  | no | Homo_sapiens | AGACAA  | 6 | 18794844 | RRM                      | 8     | 6.988 | 18050 | 6.812 | EMSA and RNase protection assay with recombinant protein.                                                                                                 |
| SRSF10  | ENSG00000188529  | no | Homo_sapiens | AGAGACA | 7 | 23846655 | RRM                      | 6     | 8.275 | 8.222 | 7.779 | RNAcompete                                                                                                                                                |
| SRSF10  | ENSG00000188529  | no | Homo_sapiens | AGAGACA | 7 | 23846655 | RRM                      | 6     | 8.275 | 8.222 | 7.779 | RNAcompete                                                                                                                                                |
| SRSF10  | ENSG00000188529  | no | Homo_sapiens | AAAGAGA | 7 | 23846655 | RRM                      | 4     | 7.881 | 7.435 | 43989 | RNAcompete                                                                                                                                                |
| SRSF10  | ENSG00000188529  | no | Homo_sapiens | GACAAA  | 6 | 18794844 | RRM                      | 9     | 7.101 | 6.623 | 6.872 | EMSA                                                                                                                                                      |
| SRSF10  | ENSG00000188529  | no | Homo_sapiens | GACAAA  | 6 | 18794844 | RRM                      | 9     | 7.101 | 6.623 | 6.872 | EMSA and RNase protection assay with recombinant protein.                                                                                                 |
| YTHDC1  | ENSG00000083896  | no | Homo_sapiens | GAUAC   | 6 | 20167602 | YTH                      | 22    | 8.085 | 7.301 | 7.782 | SELEX                                                                                                                                                     |
| ZFP36   | ENSG00000128016  | no | Homo_sapiens | CUUGU   | 5 | 18367721 | ZF_CCCH                  | 27    | 4.943 | 5.615 | 4.805 | RIP-chip                                                                                                                                                  |
| ZFP36   | ENSG00000128016  | no | Homo_sapiens | ACUUGU  | 6 | 18367721 | ZF_CCCH                  | 26    | 7.223 | 7.805 | 43928 | RIP-chip                                                                                                                                                  |
| ZFP36   | ENSG00000128016  | no | Homo_sapiens | UUGUGC  | 6 | 18367721 | ZF_CCCH                  | 28    | 7.191 | 7.467 | 7.095 | RIP-chip                                                                                                                                                  |

>SL6738-6761 apical loop - marked in red

UACAGGGGAUAAACAUUACUUUGUG

| Gene name | Gene id         | Mutated | Organism     | Motif  | Length | Reference |  | Domain       | Quality_score |       |       | Experiments |                                                                                                                                                                                                                              |
|-----------|-----------------|---------|--------------|--------|--------|-----------|--|--------------|---------------|-------|-------|-------------|------------------------------------------------------------------------------------------------------------------------------------------------------------------------------------------------------------------------------|
| CELF1     | ENSG00000149187 | no      | Homo_sapiens | UUGUG  | 5      | 20947024  |  | RRM          | 19            | 46143 | 24593 | 43835       | X-RAY DIFFRACTION                                                                                                                                                                                                            |
| ESRP1     | ENSG00000104413 | no      | Homo_sapiens | AGGGAU | 6      | 20526337  |  | RRM          | 3             | 7.662 | 8.107 | 7.644       | NMR spectroscopy                                                                                                                                                                                                             |
| GRSF1     | ENSG00000132463 | no      | Homo_sapiens | AGGGA  | 5      | 17337441  |  | RRM          | 3             | 4.963 | 5.367 | 5.241       | protein affinity purification                                                                                                                                                                                                |
|           |                 |         |              |        |        |           |  |              |               |       |       |             | SELEX of 20nt random sequences with recombinant protein. Winners confirmed by filter binding assays with purified protein and confirmed by UV-crosslink and immunoblot with HeLa nuclear extract. Consensus motif: UAGGGA/U. |
| HNRNPA1   | ENSG00000135486 | no      | Homo_sapiens | CAGGGA | 6      | 7510636   |  | RRM          | 2             | 6.617 | 6.785 | 7.126       | UV crosslink, immunoblot, EMSA.                                                                                                                                                                                              |
| HNRNPA1   | ENSG00000135486 | no      | Homo_sapiens | CAGGGA | 6      | 11598017  |  | RRM          | 2             | 6.617 | 6.785 | 7.126       | RNA affinity binding assays, immunoblot with WT HeLa nuclear extracts or depleted by RNA affinity chromatography.                                                                                                            |
| HNRNPF    | ENSG00000169813 | no      | Homo_sapiens | AGGGA  | 5      | 11571276  |  | RRM;ZF_RNPHF | 3             | 4.963 | 5.367 | 5.241       | RNA-affinity chromatography assays with HeLa nuclear extract and immunoblotting.                                                                                                                                             |
| HNRNPF    | ENSG00000169813 | no      | Homo_sapiens | AGGGA  | 5      | 17337441  |  | RRM;ZF_RNPHF | 3             | 4.963 | 5.367 | 5.241       | NMR spectroscopy                                                                                                                                                                                                             |
| HNRNPF    | ENSG00000169813 | no      | Homo_sapiens | AGGGAU | 6      | 20526337  |  | RRM;ZF_RNPHF | 3             | 7.662 | 8.107 | 7.644       | NMR spectroscopy, isothermal titration calorimetry                                                                                                                                                                           |
| HNRNPF    | ENSG00000169813 | no      | Homo_sapiens | AGGGAU | 6      | 23275549  |  | RRM;ZF_RNPHF | 3             | 7.662 | 8.107 | 7.644       | protein affinity purification                                                                                                                                                                                                |
| HNRNPF    | ENSG00000169813 | no      | Homo_sapiens | AGGGA  | 5      | 17337441  |  | RRM;ZF_RNPHF | 3             | 4.963 | 5.367 | 5.241       | Mutational analysis, RNA affinity chromatography, UV cross-linking, immunoprecipitation with HeLa nuclear extract.                                                                                                           |
| HNRNPF    | ENSG00000169813 | yes     | Homo_sapiens | AGGGA  | 5      | 19404736  |  | RRM;ZF_RNPHF | 3             | 4.963 | 5.367 | 5.241       | In vivo splicing in HEK293T and HMVEC using wt or mutated constructs.                                                                                                                                                        |
| HNRNPH1   | ENSG00000169045 | no      | Homo_sapiens | AGGGA  | 5      | 20028692  |  | ZF_RNPHF     | 3             | 4.963 | 5.367 | 5.241       | RNA affinity binding assays, immunoblot with WT HeLa nuclear extracts or depleted by RNA affinity chromatography.                                                                                                            |
| HNRNPH1   | ENSG00000169045 | no      | Homo_sapiens | AGGGA  | 5      | 11571276  |  | ZF_RNPHF     | 3             | 4.963 | 5.367 | 5.241       | RNA-affinity chromatography assays with HeLa nuclear extract and immunoblotting.                                                                                                                                             |
| HNRNPH1   | ENSG00000169045 | no      | Homo_sapiens | AGGGA  | 5      | 17337441  |  | ZF_RNPHF     | 3             | 4.963 | 5.367 | 5.241       | protein affinity purification                                                                                                                                                                                                |
| HNRNPH1   | ENSG00000169045 | yes     | Homo_sapiens | AGGGA  | 5      | 19404736  |  | ZF_RNPHF     | 3             | 4.963 | 5.367 | 5.241       | Mutational analysis, RNA affinity chromatography, UV cross-linking, immunoprecipitation with HeLa nuclear extract.                                                                                                           |
| HNRNPH1   | ENSG00000169045 | no      | Homo_sapiens | AGGGA  | 5      | 20028692  |  | ZF_RNPHF     | 3             | 4.963 | 5.367 | 5.241       | In vivo splicing in HEK293T and HMVEC using wt or mutated constructs.                                                                                                                                                        |
| HNRNPH2   | ENSG00000126945 | no      | Homo_sapiens | AGGGA  | 5      | 11571276  |  | ZF_RNPHF     | 3             | 4.963 | 5.367 | 5.241       | RNA affinity binding assays, immunoblot with WT HeLa nuclear extracts or depleted by RNA affinity chromatography.                                                                                                            |
| HNRNPH2   | ENSG00000126945 | no      | Homo_sapiens | AGGGA  | 5      | 17337441  |  | ZF_RNPHF     | 3             | 4.963 | 5.367 | 5.241       | RNA-affinity chromatography assays with HeLa nuclear extract and immunoblotting.                                                                                                                                             |
| HNRNPH2   | ENSG00000126945 | no      | Homo_sapiens | AGGGA  | 5      | 17337441  |  | ZF_RNPHF     | 3             | 4.963 | 5.367 | 5.241       | protein affinity purification                                                                                                                                                                                                |
| HNRNPH2   | ENSG00000126945 | yes     | Homo_sapiens | AGGGA  | 5      | 19404736  |  | ZF_RNPHF     | 3             | 4.963 | 5.367 | 5.241       | Mutational analysis, RNA affinity chromatography, UV cross-linking, immunoprecipitation with HeLa nuclear extract.                                                                                                           |
| HNRNPH2   | ENSG00000126945 | no      | Homo_sapiens | AGGGA  | 5      | 20028692  |  | RRM          | 3             | 4.963 | 5.367 | 5.241       | In vivo splicing in HEK293T and HMVEC using wt or mutated constructs.                                                                                                                                                        |
| HNRNPH3   | ENSG00000096746 | no      | Homo_sapiens | AGGGA  | 5      | 11571276  |  | RRM          | 3             | 4.963 | 5.367 | 5.241       | RNA affinity binding assays, immunoblot with WT HeLa nuclear extracts or depleted by RNA affinity chromatography.                                                                                                            |
| HNRNPH3   | ENSG00000096746 | no      | Homo_sapiens | AGGGA  | 5      | 17337441  |  | RRM          | 3             | 4.963 | 5.367 | 5.241       | RNA-affinity chromatography assays with HeLa nuclear extract and immunoblotting.                                                                                                                                             |

|         |                 |     |              |         |   |                  |            |    |        |        |        |                                                                                                                                                                                                                                   |
|---------|-----------------|-----|--------------|---------|---|------------------|------------|----|--------|--------|--------|-----------------------------------------------------------------------------------------------------------------------------------------------------------------------------------------------------------------------------------|
| HNRNPH3 | ENSG00000096746 | no  | Homo_sapiens | AGGGA   | 5 | 17337441         | RRM        | 3  | 4.963  | 5.367  | 5.241  | protein affinity purification                                                                                                                                                                                                     |
| HNRNPH3 | ENSG00000096746 | yes | Homo_sapiens | AGGGA   | 5 | 19404736         | RRM        | 3  | 4.963  | 5.367  | 5.241  | Mutational analysis, RNA affinity chromatography, UV cross-linking, immunoprecipitation with HeLa nuclear extract.                                                                                                                |
| HNRNPL  | ENSG00000104824 | no  | Homo_sapiens | AACA    | 4 | 15889141         | RRM        | 10 | 3.489  | 3.265  | 3.227  | SELEX of 20nt random with recombinant protein. Consensus motif: ACACACAC. Pull-down assays, UV crosslink, immunoprecipitation with HeLa nuclear extracts.                                                                         |
| HNRNPL  | ENSG00000104824 | no  | Homo_sapiens | ACAU    | 4 | 15889141         | RRM        | 11 | 3.627  | 3.654  | 3.282  | SELEX of 20nt random with recombinant protein. Consensus motif: ACACACAC. Pull-down assays, UV crosslink, immunoprecipitation with HeLa nuclear extracts.                                                                         |
| HNRNPL  | ENSG00000104824 | no  | Homo_sapiens | UACA    | 4 | 15889141         | RRM        | 0  | 3.844  | 3.794  | 3.447  | SELEX of 20nt random with recombinant protein. Consensus motif: ACACACAC. Pull-down assays, UV crosslink, immunoprecipitation with HeLa nuclear extracts.                                                                         |
| IGF2BP3 | ENSG00000136231 | no  | Homo_sapiens | CAUU    | 4 | 20371350         | KH;RRM     | 12 | 13210  | 3.775  | 3.002  | UV crosslink, immunoprecipitation with HeLa nuclear extracts.                                                                                                                                                                     |
| KHORB52 | ENSG00000112232 | no  | Homo_sapiens | GAUAAAC | 7 | 23846655         | KH         | 6  | 10.484 | 10.392 | 10.153 | PAR-clip                                                                                                                                                                                                                          |
| KHORB53 | ENSG00000131773 | no  | Homo_sapiens | AUAAAC  | 6 | 23846655         | KH         | 7  | 7.922  | 8.578  | 7.414  | RNAcompete                                                                                                                                                                                                                        |
| KHSRP   | ENSG00000088247 | no  | Homo_sapiens | AGGG    | 4 | 18684992         | KH         | 3  | 3.087  | 3.548  | 3.585  | RNAcompete                                                                                                                                                                                                                        |
| NONO    | ENSG00000147140 | no  | Homo_sapiens | AGGGA   | 5 | 9001221          | RRM        | 3  | 4.963  | 5.367  | 5.241  | NMR                                                                                                                                                                                                                               |
| PTBP1   | ENSG00000011304 | no  | Homo_sapiens | CUUU    | 4 | 16179478         | RRM        | 3  | 4.963  | 5.367  | 5.241  | SELEX                                                                                                                                                                                                                             |
| PTBP1   | ENSG00000011304 | no  | Homo_sapiens | UUACUUU | 7 | 19561594         | PTBP1      | 17 | 2.805  | 3.576  | 2.592  | NMR                                                                                                                                                                                                                               |
| RBM41   | ENSG00000089682 | no  | Homo_sapiens | UUACUUU | 7 | 23846655         | RRM        | 14 | 8.591  | 45200  | 8.238  | RNAcompete using recombinant protein                                                                                                                                                                                              |
|         |                 |     |              |         |   |                  |            | 14 | 8.591  | 45200  | 8.238  | RNAcompete                                                                                                                                                                                                                        |
| SRSF5   | ENSG00000100650 | no  | Homo_sapiens | ACAGG   | 5 | 9649504          | RRM        |    |        |        |        | Functional SELEX of constructs with 20nt random by splicing in HeLa S100 extracts complemented by recombinant protein. Consensus motif: ACDGS. UV crosslink, competition and immunoprecipitation assays in HeLa nuclear extracts. |
| TIA1    | ENSG00000116001 | no  | Homo_sapiens | CUUUG   | 5 | 8576255          | RRM        | 1  | 5.164  | 46143  | 5.218  | SELEX of 68nt random with recombinant protein. Winners confirmed by UV cross-linking and competition assay.                                                                                                                       |
| TIAL1   | ENSG00000151923 | no  | Homo_sapiens | AUUA    | 4 | 8576255          | RRM        | 17 | 4.894  | 5.086  | 4.793  | SELEX of 68nt random with recombinant protein. Winners confirmed by UV cross-linking and competition assay.                                                                                                                       |
| TIAL1   | ENSG00000151923 | no  | Homo_sapiens | AUUA    | 4 | 8576255          | RRM        | 13 | 23071  | 4.468  | 43924  | SELEX of 68nt random with recombinant protein. Winners confirmed by UV cross-linking and competition assay.                                                                                                                       |
| TIAL1   | ENSG00000151923 | no  | Homo_sapiens | CUUUG   | 5 | 8576255          | RRM        | 17 | 4.894  | 5.086  | 4.793  | SELEX of 68nt random with recombinant protein. Winners confirmed by UV cross-linking and competition assay.                                                                                                                       |
| HNRNPH1 | ENSG00000169045 | no  | Homo_sapiens | GGGA    | 4 | 11847131;9343212 | ZF_RNPHF   | 4  | 4.039  | 3.224  | 3.386  | snRNA inactivation in HeLa cell nuclear extract;Western blot                                                                                                                                                                      |
| QKI     | ENSG00000112531 | no  | Homo_sapiens | AUUAAC  | 6 | 24722255         | KH         | 3  | 8.916  | 9.835  | 8.452  | EMSA with WT and mutated sequences and UV crosslinking with recombinant protein                                                                                                                                                   |
| SF1     | ENSG00000168066 | no  | Homo_sapiens | AUUAAC  | 6 | 24722255         | KH;ZF_CCHC | 3  | 8.916  | 9.835  | 8.452  | EMSA with WT and mutated sequences and UV crosslinking with recombinant protein                                                                                                                                                   |
| TIAL1   | ENSG00000151923 | no  | Homo_sapiens | AUUA    | 4 | 8576255          | RRM        | 3  | 4.215  | 5.053  | 3.625  | SELEX of 68nt random with recombinant protein. Winners confirmed by UV cross-linking and competition assay.                                                                                                                       |

|                  |                 |         |              |        |        |           |            |               |             |       |       |                                                                                                                                                           |
|------------------|-----------------|---------|--------------|--------|--------|-----------|------------|---------------|-------------|-------|-------|-----------------------------------------------------------------------------------------------------------------------------------------------------------|
| >S6810-6826      |                 |         |              |        |        |           |            |               |             |       |       |                                                                                                                                                           |
| AUGAUUAACAUAUCAU |                 |         |              |        |        |           |            |               |             |       |       |                                                                                                                                                           |
| Gene name        | Gene id         | Mutated | Organism     | Motif  | Length | Reference | Domain     | Quality_score | Experiments |       |       |                                                                                                                                                           |
| HNRNPL           | ENSG00000104824 | no      | Homo_sapiens | AACA   | 4      | 15889141  | RRM        | 6             | 4.074       | 31107 | 3.812 | SELEX of 20nt random with recombinant protein. Consensus motif: ACACACAC. Pull-down assays, UV crosslink, immunoprecipitation with HeLa nuclear extracts. |
| HNRNPL           | ENSG00000104824 | no      | Homo_sapiens | ACAA   | 4      | 15889141  | RRM        | 7             | 4.286       | 3.894 | 4.007 | Pull-down assays, UV crosslink, immunoprecipitation with HeLa nuclear extracts.                                                                           |
| NOVA1            | ENSG00000139910 | no      | Homo_sapiens | UCAU   | 4      | 10811881  | KH         | 13            | 4.058       | 4.159 | 3.788 | SELEX                                                                                                                                                     |
| NOVA1            | ENSG00000139910 | no      | Homo_sapiens | UCAU   | 4      | 17655233  | KH         | 13            | 4.058       | 4.159 | 3.788 | NMR                                                                                                                                                       |
| NOVA2            | ENSG00000104967 | no      | Homo_sapiens | UCAU   | 4      | 10811881  | KH         | 13            | 4.058       | 4.159 | 3.788 | SELEX                                                                                                                                                     |
| QKI              | ENSG00000112531 | no      | Homo_sapiens | AUUAAC | 6      | 24722255  | KH         | 3             | 8.916       | 9.835 | 8.452 | EMSA with WT and mutated sequences and UV crosslinking with recombinant protein                                                                           |
| SF1              | ENSG00000168066 | no      | Homo_sapiens | AUUAAC | 6      | 24722255  | KH;ZF_CCHC | 3             | 8.916       | 9.835 | 8.452 | EMSA with WT and mutated sequences and UV crosslinking with recombinant protein                                                                           |
| TIAL1            | ENSG00000151923 | no      | Homo_sapiens | AUUA   | 4      | 8576255   | RRM        | 3             | 4.215       | 5.053 | 3.625 | SELEX of 68nt random with recombinant protein. Winners confirmed by UV cross-linking and competition assay.                                               |

|                            |                 |         |              |         |        |           |              |               |             |       |        |                                                                                                                    |
|----------------------------|-----------------|---------|--------------|---------|--------|-----------|--------------|---------------|-------------|-------|--------|--------------------------------------------------------------------------------------------------------------------|
| >SL6854-6878               |                 |         |              |         |        |           |              |               |             |       |        |                                                                                                                    |
| CAAAGGGAUUUGACUUGGACCAAUUC |                 |         |              |         |        |           |              |               |             |       |        |                                                                                                                    |
| Gene name                  | Gene id         | Mutated | Organism     | Motif   | Length | Reference | Domain       | Quality_score | Experiments |       |        |                                                                                                                    |
| EIF4B                      | ENSG00000063046 | no      | Homo_sapiens | CUUGGAC | 7      | 8846295   | RRM          | 12            | 9.817       | 9.354 | 10.161 | SELEX                                                                                                              |
| ESRP1                      | ENSG00000104413 | no      | Homo_sapiens | AGGGAU  | 6      | 20526337  | RRM          | 3             | 7.588       | 8.033 | 21002  | NMR spectroscopy                                                                                                   |
| GRSF1                      | ENSG00000132463 | no      | Homo_sapiens | AGGGA   | 5      | 17337441  | RRM          | 3             | 4.892       | 5.297 | 5.171  | protein affinity purification                                                                                      |
| HNRNPF                     | ENSG00000169813 | no      | Homo_sapiens | AGGGA   | 5      | 11571276  | RRM;ZF_RNPHF | 3             | 4.892       | 5.297 | 5.171  | RNA affinity binding assays, immunoblot with WT HeLa nuclear extracts or depleted by RNA affinity chromatography.  |
| HNRNPF                     | ENSG00000169813 | no      | Homo_sapiens | AGGGA   | 5      | 17337441  | RRM;ZF_RNPHF | 3             | 4.892       | 5.297 | 5.171  | RNA-affinity chromatography assays with HeLa nuclear extract and immunoblotting.                                   |
| HNRNPF                     | ENSG00000169813 | no      | Homo_sapiens | AGGGAU  | 6      | 20526337  | RRM;ZF_RNPHF | 3             | 7.588       | 8.033 | 21002  | NMR spectroscopy                                                                                                   |
| HNRNPF                     | ENSG00000169813 | no      | Homo_sapiens | AGGGAU  | 6      | 23275549  | RRM;ZF_RNPHF | 3             | 7.588       | 8.033 | 21002  | NMR spectroscopy, isothermal titration calorimetry                                                                 |
| HNRNPF                     | ENSG00000169813 | no      | Homo_sapiens | AGGGA   | 5      | 17337441  | RRM;ZF_RNPHF | 3             | 4.892       | 5.297 | 5.171  | protein affinity purification                                                                                      |
| HNRNPF                     | ENSG00000169813 | yes     | Homo_sapiens | AGGGA   | 5      | 19404736  | RRM;ZF_RNPHF | 3             | 4.892       | 5.297 | 5.171  | Mutational analysis, RNA affinity chromatography, UV cross-linking, immunoprecipitation with HeLa nuclear extract. |
| HNRNPH1                    | ENSG00000169045 | no      | Homo_sapiens | AGGGA   | 5      | 20028692  | ZF_RNPHF     | 3             | 4.892       | 5.297 | 5.171  | In vivo splicing in HEK293T and HMVEC using wt or mutated constructs.                                              |
| HNRNPH1                    | ENSG00000169045 | no      | Homo_sapiens | AGGGA   | 5      | 11571276  | ZF_RNPHF     | 3             | 4.892       | 5.297 | 5.171  | RNA affinity binding assays, immunoblot with WT HeLa nuclear extracts or depleted by RNA affinity chromatography.  |

| HNRNPH1                                  | ENSG00000169045 | no      | Homo_sapiens | AGGGA   | 5      | 17337441          | ZF_RNPHF            | 3             | 4.892       | 5.297  | 5.171  | RNA-affinity chromatography assays with HeLa nuclear extract and immunoblotting.<br>protein affinity purification                                                                                                                  |
|------------------------------------------|-----------------|---------|--------------|---------|--------|-------------------|---------------------|---------------|-------------|--------|--------|------------------------------------------------------------------------------------------------------------------------------------------------------------------------------------------------------------------------------------|
| HNRNPH1                                  | ENSG00000169045 | no      | Homo_sapiens | AGGGA   | 5      | 17337441          | ZF_RNPHF            | 3             | 4.892       | 5.297  | 5.171  |                                                                                                                                                                                                                                    |
| HNRNPH1                                  | ENSG00000169045 | yes     | Homo_sapiens | AGGGA   | 5      | 19404736          | ZF_RNPHF            | 3             | 4.892       | 5.297  | 5.171  | Mutational analysis, RNA affinity chromatography, UV cross-linking, immunoprecipitation with HeLa nuclear extract.                                                                                                                 |
| HNRNPH2                                  | ENSG00000126945 | no      | Homo_sapiens | AGGGA   | 5      | 20028692          | ZF_RNPHF            | 3             | 4.892       | 5.297  | 5.171  | In vivo splicing in HEK293T and HMVEC using wt or mutated constructs.                                                                                                                                                              |
| HNRNPH2                                  | ENSG00000126945 | no      | Homo_sapiens | AGGGA   | 5      | 11571276          | ZF_RNPHF            | 3             | 4.892       | 5.297  | 5.171  | RNA affinity binding assays, immunoblot with WT HeLa nuclear extracts or depleted by RNA affinity chromatography.                                                                                                                  |
| HNRNPH2                                  | ENSG00000126945 | no      | Homo_sapiens | AGGGA   | 5      | 17337441          | ZF_RNPHF            | 3             | 4.892       | 5.297  | 5.171  | RNA-affinity chromatography assays with HeLa nuclear extract and immunoblotting.                                                                                                                                                   |
| HNRNPH2                                  | ENSG00000126945 | no      | Homo_sapiens | AGGGA   | 5      | 17337441          | ZF_RNPHF            | 3             | 4.892       | 5.297  | 5.171  | protein affinity purification                                                                                                                                                                                                      |
| HNRNPH2                                  | ENSG00000126945 | yes     | Homo_sapiens | AGGGA   | 5      | 19404736          | ZF_RNPHF            | 3             | 4.892       | 5.297  | 5.171  | Mutational analysis, RNA affinity chromatography, UV cross-linking, immunoprecipitation with HeLa nuclear extract.                                                                                                                 |
| HNRNPH3                                  | ENSG00000096746 | no      | Homo_sapiens | AGGGA   | 5      | 20028692          | RRM                 | 3             | 4.892       | 5.297  | 5.171  | In vivo splicing in HEK293T and HMVEC using wt or mutated constructs.                                                                                                                                                              |
| HNRNPH3                                  | ENSG00000096746 | no      | Homo_sapiens | AGGGA   | 5      | 11571276          | RRM                 | 3             | 4.892       | 5.297  | 5.171  | RNA affinity binding assays, immunoblot with WT HeLa nuclear extracts or depleted by RNA affinity chromatography.                                                                                                                  |
| HNRNPH3                                  | ENSG00000096746 | no      | Homo_sapiens | AGGGA   | 5      | 17337441          | RRM                 | 3             | 4.892       | 5.297  | 5.171  | RNA-affinity chromatography assays with HeLa nuclear extract and immunoblotting.                                                                                                                                                   |
| HNRNPH3                                  | ENSG00000096746 | no      | Homo_sapiens | AGGGA   | 5      | 17337441          | RRM                 | 3             | 4.892       | 5.297  | 5.171  | protein affinity purification                                                                                                                                                                                                      |
| HNRNPH3                                  | ENSG00000096746 | yes     | Homo_sapiens | AGGGA   | 5      | 19404736          | RRM                 | 3             | 4.892       | 5.297  | 5.171  | Mutational analysis, RNA affinity chromatography, UV cross-linking, immunoprecipitation with HeLa nuclear extract.                                                                                                                 |
| KHSRP                                    | ENSG00000088247 | no      | Homo_sapiens | AGGG    | 4      | 18684992          | KH                  | 3             | 43864       | 3.481  | 3.518  | NMR                                                                                                                                                                                                                                |
| NONO                                     | ENSG00000147140 | no      | Homo_sapiens | AGGGA   | 5      | 9001221           | RRM                 | 3             | 4.892       | 5.297  | 5.171  | SELEX                                                                                                                                                                                                                              |
| OAS1                                     | ENSG00000089127 | no      | Homo_sapiens | UUGA    | 4      | 23319625          | OAS1_C;NTP_TRANSF_2 | 8             | 13940       | 3.593  | 3.037  | X-RAY DIFFRACTION                                                                                                                                                                                                                  |
| PTBP1                                    | ENSG00000011304 | no      | Homo_sapiens | CUUG    | 4      | 16179478          | RRM                 | 12            | 3.345       | 3.716  | 3.267  | NMR                                                                                                                                                                                                                                |
| SRSF10                                   | ENSG00000188529 | no      | Homo_sapiens | AAAGGGA | 7      | 23846655          | RRM                 | 1             | 8.893       | 8.967  | 8.777  | RNAcompete                                                                                                                                                                                                                         |
| SRSF5                                    | ENSG00000100650 | no      | Homo_sapiens | AAAGG   | 5      | 9649504           | RRM                 | 1             | 5.123       | 5.051  | 5.118  | Functional SELEX of constructs with 20nt random by splicing in HeLa S100 extracts complemented by recombinant protein. Consensus motif: ACDGS. UV crosslink, competition and immunoprecipitation assays in HeLa nuclear extracts.  |
| SRSF9                                    | ENSG0000011786  | no      | Homo_sapiens | UGGAC   | 5      | 17548433          | RRM                 | 14            | 5.605       | 4.777  | 6.177  | SELEX of 20nt random with recombinant protein. Consensus motif: AGGAC. EMSA, UV crosslink, SDS-PAGE with HeLa nuclear extracts.                                                                                                    |
| TIA1                                     | ENSG00000116001 | no      | Homo_sapiens | AUUC    | 4      | 8576255           | RRM                 | 21            | 3.681       | 3.902  | 3.349  | SELEX of 68nt random with recombinant protein. Winners confirmed by UV cross-linking and competition assay.                                                                                                                        |
| TIAL1                                    | ENSG00000151923 | no      | Homo_sapiens | AUUC    | 4      | 8576255           | RRM                 | 21            | 3.681       | 3.902  | 3.349  | SELEX of 68nt random with recombinant protein. Winners confirmed by UV cross-linking and competition assay.                                                                                                                        |
| HNRNPH1                                  | ENSG00000169045 | no      | Homo_sapiens | GGGA    | 4      | 11847131;9343212  | ZF_RNPHF            | 4             | 2.972       | 3.157  | 3.319  | snRNA inactivation in HeLa cell nuclear extract;Western blot                                                                                                                                                                       |
| >SL6891-6922 apical loop - marked in red |                 |         |              |         |        |                   |                     |               |             |        |        |                                                                                                                                                                                                                                    |
| UAUGGUGAUGAUGAUGCAUCGUACCCAUG            |                 |         |              |         |        |                   |                     |               |             |        |        |                                                                                                                                                                                                                                    |
| Gene name                                | Gene id         | Mutated | Organism     | Motif   | Length | Reference         | Domain              | Quality_score | Experiments |        |        |                                                                                                                                                                                                                                    |
| CEL2F                                    | ENSG00000048740 | no      | Homo_sapiens | AUGUG   | 5      | 15657417          | RRM                 | 10            | 4.758       | 4.781  | 22737  | SELEX of 20nt random with recombinant protein, some winner sequences are verified by EMSA.                                                                                                                                         |
| CEL2F                                    | ENSG00000048740 | no      | Homo_sapiens | CAUCG   | 5      | 15657417          | RRM                 | 19            | 6.944       | 5.605  | 8.185  | SELEX of 20nt random with recombinant protein, some winner sequences are verified by EMSA.                                                                                                                                         |
| CMTR1                                    | ENSG00000137200 | no      | Homo_sapiens | GAUC    | 4      | 24402442          | FTSJ;G-PATCH        | 14            | 3.859       | 3.411  | 3.774  | X-RAY DIFFRACTION                                                                                                                                                                                                                  |
| FUS                                      | ENSG00000089280 | no      | Homo_sapiens | GGUG    | 4      | 11098054          | ZF_RANBP;RRM        | 3             | 2.656       | 2.759  | 3.049  | SELEX                                                                                                                                                                                                                              |
| FUS                                      | ENSG00000089280 | no      | Homo_sapiens | UGGUGA  | 6      | 11098054          | RRM                 | 2             | 6.401       | 6.204  | 6.523  | SELEX of 25nt random with recombinant protein. Consensus motif: GGUG. SDS-PAGE, EMSA, UV crosslink, competition and immunoprecipitation assays with HeLa nuclear extracts.                                                         |
| HNRNPK                                   | ENSG00000165119 | no      | Homo_sapiens | ACCCAU  | 6      | 11278705          | KH                  | 25            | 7.611       | 7.606  | 7.539  | SELEX of 50nt random with recombinant protein. Consensus motif: u/aCCCCCu/a. Winners confirmed by EMSA with recombinant protein.                                                                                                   |
| NOVA1                                    | ENSG00000139910 | no      | Homo_sapiens | CCAU    | 4      | 17655233          | KH                  | 27            | 3.112       | 2.984  | 3.011  | NMR                                                                                                                                                                                                                                |
| PHAX                                     | ENSG00000164902 | no      | Homo_sapiens | AUCG    | 4      | 20430857          | RNA_GG_BIND         | 15;20         | 6.524       | 18019  | 7.089  | SOLUTION NMR                                                                                                                                                                                                                       |
| RBM46                                    | ENSG00000151962 | no      | Homo_sapiens | GAUGAUG | 7      | 23846655          | RRM                 | 6             | 8.478       | 7.277  | 8.808  | RNAcompete                                                                                                                                                                                                                         |
| SRSF1                                    | ENSG00000136450 | no      | Homo_sapiens | UGAUGAU | 7      | 18841201          | RRM                 | 5             | 8.586       | 7.803  | 8.531  | genome-wide in vivo immunoprecipitation                                                                                                                                                                                            |
| SRSF1                                    | ENSG00000136450 | no      | Homo_sapiens | UGGUGAU | 7      | 18841201          | RRM                 | 2             | 8.842       | 8.381  | 8.718  | genome-wide in vivo immunoprecipitation                                                                                                                                                                                            |
| SRSF3                                    | ENSG00000112081 | no      | Homo_sapiens | CAUC    | 4      | 17036044          | RRM                 | 19            | 3.192       | 2.646  | 3.354  | NMR spectroscopy                                                                                                                                                                                                                   |
| SRSF3                                    | ENSG00000112081 | no      | Homo_sapiens | GAUC    | 4      | 17036044          | RRM                 | 14            | 3.859       | 3.411  | 3.774  | NMR spectroscopy                                                                                                                                                                                                                   |
| SRSF6                                    | ENSG00000124193 | no      | Homo_sapiens | AUCGUA  | 6      | 9649504           | RRM                 | 20            | 10.286      | 10.013 | 10.219 | Functional SELEX of constructs with 20nt random by splicing in HeLa S100 extracts complemented by recombinant protein. Consensus motif: USCGKM. UV crosslink, competition and immunoprecipitation assays in HeLa nuclear extracts. |
| YBX1                                     | ENSG00000065978 | no      | Homo_sapiens | CAUC    | 4      | 22730292          | CSD                 | 19            | 3.192       | 2.646  | 3.354  | In vivo splicing in HEK-293 cells with wt and mutated sequences, EMSA                                                                                                                                                              |
| YBX1                                     | ENSG00000065978 | no      | Homo_sapiens | CAUC    | 4      | 22730292          | CSD                 | 14            | 3.859       | 3.411  | 3.774  | SELEX of 20nt random sequences with recombinant protein. Winners confirmed by EMSA with recombinant protein.                                                                                                                       |
| YTHDC1                                   | ENSG00000083896 | no      | Homo_sapiens | UCGUAC  | 6      | 20167602          | YTH                 | 21            | 10.717      | 10.015 | 11.089 | EMSA with recombinant protein.                                                                                                                                                                                                     |
| SRSF5                                    | ENSG00000100650 | no      | Homo_sapiens | CGCAUC  | 6      | 11967553;12824367 | RRM                 | 17            | 41518       | 7.961  | 10.481 | SELEX                                                                                                                                                                                                                              |

>SL6940-6957 apical loop - marked in red

UACUCGCGAAGCUGGUA

| Gene name | Gene id         | Mutated | Organism     | Motif    | Length | Reference | Domain                   | Quality_score |        |       | Experiments       |                                                                                 |
|-----------|-----------------|---------|--------------|----------|--------|-----------|--------------------------|---------------|--------|-------|-------------------|---------------------------------------------------------------------------------|
| F2        | ENSG00000180210 | no      | Homo_sapiens | GAAG     | 4      | 18971322  | GLA;KRINGLE;THROMBIN_L_8 | 3.591         | 2.922  | 3.915 | X-RAY DIFFRACTION |                                                                                 |
| MBNL1     | ENSG00000152601 | no      | Homo_sapiens | UCCGUG   | 6      | 20071745  | ZF_CCCH                  | 3             | 9.456  | 26512 | 10.566            | SELEX of 32nt random with recombinant protein. Consensus motifs: YGCY, YYGCUKY. |
| MBNL1     | ENSG00000152601 | no      | Homo_sapiens | CGCU     | 4      | 20071745  | ZF_CCCH                  | 4             | 5.552  | 4.951 | 6.706             | SELEX                                                                           |
| PTBP1     | ENSG00000011304 | no      | Homo_sapiens | UGA      | 4      | 16179478  | RRM                      | 6             | 3.615  | 3.448 | 3.742             | NMR                                                                             |
| PTBP1     | ENSG00000011304 | no      | Homo_sapiens | CUCG     | 4      | 16179478  | RRM                      | 2             | 5.569  | 5.186 | 44713             | NMR                                                                             |
| PTBP1     | ENSG00000011304 | no      | Homo_sapiens | CUGG     | 4      | 16179478  | RRM                      | 12            | 3.121  | 2.881 | 3.492             | NMR                                                                             |
| SAMD4A    | ENSG00000020577 | no      | Homo_sapiens | CGCUGGUA | 7      | 23846655  | SAM                      | 11            | 10.713 | 27303 | 10.847            | RNAcompete                                                                      |
| SRSF1     | ENSG00000136450 | no      | Homo_sapiens | UGAAGCU  | 7      | 18841201  | RRM                      | 7             | 9.708  | 8.949 | 9.969             | genome-wide in vivo immunoprecipitation                                         |

>SL6987-7036 apical loop - marked in red

GAUAAGGGAGAGUCUUUAACGAAGUUACCUGGACCAACGCCACUUUCCU

| Gene name | Gene id         | Mutated | Organism     | Motif  | Length | Reference | Domain                    | Quality_score |       |       | Experiments       |                                                                                                                                                           |
|-----------|-----------------|---------|--------------|--------|--------|-----------|---------------------------|---------------|-------|-------|-------------------|-----------------------------------------------------------------------------------------------------------------------------------------------------------|
| CPEB4     | ENSG00000113742 | no      | Homo_sapiens | CUUUA  | 5      | 24990967  | RRM                       | 14            | 4.206 | 5.066 | 3.833             | SOLUTION NMR                                                                                                                                              |
| ELAVL2    | ENSG00000107105 | no      | Homo_sapiens | CUUUA  | 5      | 8497264   | RRM                       | 14            | 4.206 | 5.066 | 3.833             | SELEX of 25nt random with recombinant protein.                                                                                                            |
| ELAVL2    | ENSG00000107105 | no      | Homo_sapiens | CUUUC  | 5      | 8497264   | RRM                       | 43            | 3.749 | 4.502 | 3.714             | SELEX of 25nt random with recombinant protein.                                                                                                            |
| F2        | ENSG00000180210 | no      | Homo_sapiens | GAAG   | 4      | 18971322  | GLA;KRINGLE;THROMBIN_L_21 | 1.944         | 1.274 | 2.267 | X-RAY DIFFRACTION |                                                                                                                                                           |
| GRSF1     | ENSG00000132463 | no      | Homo_sapiens | AGGGA  | 5      | 17337441  | RRM                       | 4             | 3.761 | 4.166 | 43925             | protein affinity purification                                                                                                                             |
| HNRNPF    | ENSG00000169813 | no      | Homo_sapiens | AGGGA  | 5      | 11571276  | RRM;ZF_RNPHF              | 4             | 3.761 | 4.166 | 43925             | RNA affinity binding assays, immunoblot with WT HeLa nuclear extracts or depleted by RNA affinity chromatography.                                         |
| HNRNPF    | ENSG00000169813 | no      | Homo_sapiens | AGGGA  | 5      | 17337441  | RRM;ZF_RNPHF              | 4             | 3.761 | 4.166 | 43925             | RNA-affinity chromatography assays with HeLa nuclear extract and immunoblotting.                                                                          |
| HNRNPF    | ENSG00000169813 | no      | Homo_sapiens | AGGGA  | 5      | 17337441  | RRM;ZF_RNPHF              | 4             | 3.761 | 4.166 | 43925             | protein affinity purification                                                                                                                             |
| HNRNPF    | ENSG00000169813 | yes     | Homo_sapiens | AGGGA  | 5      | 19404736  | RRM;ZF_RNPHF              | 4             | 3.761 | 4.166 | 43925             | Mutational analysis, RNA affinity chromatography, UV cross-linking, immunoprecipitation with HeLa nuclear extract.                                        |
| HNRNPH1   | ENSG00000169045 | no      | Homo_sapiens | AGGGA  | 5      | 20028692  | ZF_RNPHF                  | 4             | 3.761 | 4.166 | 43925             | In vivo splicing in HEK293T and HMVEC using wt or mutated constructs.                                                                                     |
| HNRNPH1   | ENSG00000169045 | no      | Homo_sapiens | AGGGA  | 5      | 11571276  | ZF_RNPHF                  | 4             | 3.761 | 4.166 | 43925             | RNA affinity binding assays, immunoblot with WT HeLa nuclear extracts or depleted by RNA affinity chromatography.                                         |
| HNRNPH1   | ENSG00000169045 | no      | Homo_sapiens | AGGGA  | 5      | 17337441  | ZF_RNPHF                  | 4             | 3.761 | 4.166 | 43925             | RNA-affinity chromatography assays with HeLa nuclear extract and immunoblotting.                                                                          |
| HNRNPH1   | ENSG00000169045 | no      | Homo_sapiens | AGGGA  | 5      | 17337441  | ZF_RNPHF                  | 4             | 3.761 | 4.166 | 43925             | protein affinity purification                                                                                                                             |
| HNRNPH1   | ENSG00000169045 | yes     | Homo_sapiens | AGGGA  | 5      | 19404736  | ZF_RNPHF                  | 4             | 3.761 | 4.166 | 43925             | Mutational analysis, RNA affinity chromatography, UV cross-linking, immunoprecipitation with HeLa nuclear extract.                                        |
| HNRNPH2   | ENSG00000126945 | no      | Homo_sapiens | AGGGA  | 5      | 20028692  | ZF_RNPHF                  | 4             | 3.761 | 4.166 | 43925             | In vivo splicing in HEK293T and HMVEC using wt or mutated constructs.                                                                                     |
| HNRNPH2   | ENSG00000126945 | no      | Homo_sapiens | AGGGA  | 5      | 11571276  | ZF_RNPHF                  | 4             | 3.761 | 4.166 | 43925             | RNA affinity binding assays, immunoblot with WT HeLa nuclear extracts or depleted by RNA affinity chromatography.                                         |
| HNRNPH2   | ENSG00000126945 | no      | Homo_sapiens | AGGGA  | 5      | 17337441  | ZF_RNPHF                  | 4             | 3.761 | 4.166 | 43925             | RNA-affinity chromatography assays with HeLa nuclear extract and immunoblotting.                                                                          |
| HNRNPH2   | ENSG00000126945 | no      | Homo_sapiens | AGGGA  | 5      | 17337441  | ZF_RNPHF                  | 4             | 3.761 | 4.166 | 43925             | protein affinity purification                                                                                                                             |
| HNRNPH2   | ENSG00000126945 | yes     | Homo_sapiens | AGGGA  | 5      | 19404736  | ZF_RNPHF                  | 4             | 3.761 | 4.166 | 43925             | Mutational analysis, RNA affinity chromatography, UV cross-linking, immunoprecipitation with HeLa nuclear extract.                                        |
| HNRNPH3   | ENSG00000096746 | no      | Homo_sapiens | AGGGA  | 5      | 20028692  | RRM                       | 4             | 3.761 | 4.166 | 43925             | In vivo splicing in HEK293T and HMVEC using wt or mutated constructs.                                                                                     |
| HNRNPH3   | ENSG00000096746 | no      | Homo_sapiens | AGGGA  | 5      | 11571276  | RRM                       | 4             | 3.761 | 4.166 | 43925             | RNA affinity binding assays, immunoblot with WT HeLa nuclear extracts or depleted by RNA affinity chromatography.                                         |
| HNRNPH3   | ENSG00000096746 | no      | Homo_sapiens | AGGGA  | 5      | 17337441  | RRM                       | 4             | 3.761 | 4.166 | 43925             | RNA-affinity chromatography assays with HeLa nuclear extract and immunoblotting.                                                                          |
| HNRNPH3   | ENSG00000096746 | no      | Homo_sapiens | AGGGA  | 5      | 17337441  | RRM                       | 4             | 3.761 | 4.166 | 43925             | protein affinity purification                                                                                                                             |
| HNRNPH3   | ENSG00000096746 | yes     | Homo_sapiens | AGGGA  | 5      | 19404736  | RRM                       | 4             | 3.761 | 4.166 | 43925             | Mutational analysis, RNA affinity chromatography, UV cross-linking, immunoprecipitation with HeLa nuclear extract.                                        |
| HNRNPL    | ENSG00000104824 | no      | Homo_sapiens | CCAC   | 4      | 15889141  | RRM                       | 40            | 2.203 | 1.952 | 2.458             | SELEX of 20nt random with recombinant protein. Consensus motif: ACACACAC. Pull-down assays, UV crosslink, immunoprecipitation with HeLa nuclear extracts. |
| KHSRP     | ENSG00000088247 | no      | Homo_sapiens | AGGG   | 4      | 18684992  | KH                        | 4             | 1.925 | 2.386 | 2.423             | NMR                                                                                                                                                       |
| MBNL1     | ENSG00000152601 | no      | Homo_sapiens | GUGCUU | 6      | 20071745  | ZF_CCCH                   | 11            | 6.279 | 6.807 | 11475             | SELEX of 32nt random with recombinant protein. Consensus motifs: YGCY, YYGCUKY.                                                                           |
| MBNL1     | ENSG00000152601 | no      | Homo_sapiens | CGCC   | 4      | 20071745  | ZF_CCCH                   | 38            | 3.245 | 28522 | 4.379             | SELEX                                                                                                                                                     |
| MBNL1     | ENSG00000152601 | no      | Homo_sapiens | UGCU   | 4      | 20071745  | ZF_CCCH                   | 12            | 1.947 | 1.845 | 2.053             | SELEX                                                                                                                                                     |
| NONO      | ENSG00000147140 | no      | Homo_sapiens | AGGGA  | 5      | 9001221   | RRM                       | 4             | 3.761 | 4.166 | 43925             | SELEX                                                                                                                                                     |
| NOVA1     | ENSG00000139910 | no      | Homo_sapiens | CCAC   | 4      | 17655233  | KH                        | 40            | 2.203 | 1.952 | 2.458             | NMR                                                                                                                                                       |
| NXF1      | ENSG00000162231 | no      | Homo_sapiens | CCUG   | 4      | 21822283  | LRR_1;NTF2;TAP-RNA_BIN    | 28            | 1.418 | 1.229 | 1.836             | X-RAY DIFFRACTION                                                                                                                                         |
| PIWIL1    | ENSG00000125207 | no      | Homo_sapiens | GCUU   | 4      | 21193640  | GAGE;PAZ;PIWI             | 13            | 2.401 | 2.605 | 2.425             | X-RAY DIFFRACTION                                                                                                                                         |
| PTBP1     | ENSG00000011304 | no      | Homo_sapiens | CUUU   | 4      | 16179478  | RRM                       | 14;43         | 2.643 | 3.413 | 15738             | NMR                                                                                                                                                       |
| PTBP1     | ENSG00000011304 | no      | Homo_sapiens | CUGG   | 4      | 16179478  | RRM                       | 29            | 1.474 | 1.233 | 1.844             | NMR                                                                                                                                                       |
| PTBP1     | ENSG00000011304 | no      | Homo_sapiens | CCUGG  | 5      | 16179478  | RRM                       | 28            | 3.025 | 2.761 | 3.536             | NMR                                                                                                                                                       |
| RC3H1     | ENSG00000135870 | no      | Homo_sapiens | UUUC   | 4      | 25026078  | ZF_CCCH                   | 44            | 1.674 | 2.634 | 1.434             | X-RAY DIFFRACTION                                                                                                                                         |



| SRP68                                                     | ENSG00000167881 | no      | Homo_sapiens | UAAG    | 4      | 24700861         | SRP68               | 2             | 2.756       | 3.674 | 2.544  | X-RAY DIFFRACTION                                                                                                               |
|-----------------------------------------------------------|-----------------|---------|--------------|---------|--------|------------------|---------------------|---------------|-------------|-------|--------|---------------------------------------------------------------------------------------------------------------------------------|
| SRSF1                                                     | ENSG00000136450 | no      | Homo_sapiens | CCAACGC | 7      | 16825284         | RRM                 | 34            | 10.381      | 9.214 | 12.005 | Functional SELEX of random 7nt and 14nt with recombinant protein. Consensus motifs: CSSSSR and CSMSSA.                          |
| SRSF2                                                     | ENSG00000161547 | no      | Homo_sapiens | GGAGAG  | 6      | 23846655         | RRM                 | 6             | 11444       | 5.064 | 5.866  | RNAcompete                                                                                                                      |
| SRSF9                                                     | ENSG00000111786 | no      | Homo_sapiens | UGGAC   | 5      | 17548433         | RRM                 | 30            | 4.474       | 3.646 | 5.046  | SELEX of 20nt random with recombinant protein. Consensus motif: AGGAC. EMSA, UV crosslink, SDS-PAGE with HeLa nuclear extracts. |
| TIA1                                                      | ENSG00000116001 | no      | Homo_sapiens | CUUUA   | 5      | 8576255          | RRM                 | 14            | 4.206       | 5.066 | 3.833  | SELEX of 68nt random with recombinant protein. Winners confirmed by UV cross-linking and competition assay.                     |
| TIA1                                                      | ENSG00000116001 | no      | Homo_sapiens | CUUUC   | 5      | 8576255          | RRM                 | 43            | 3.749       | 4.502 | 3.714  | SELEX of 68nt random with recombinant protein. Winners confirmed by UV cross-linking and competition assay.                     |
| TIAL1                                                     | ENSG00000151923 | no      | Homo_sapiens | CUUUA   | 5      | 8576255          | RRM                 | 14            | 4.206       | 5.066 | 3.833  | SELEX of 68nt random with recombinant protein. Winners confirmed by UV cross-linking and competition assay.                     |
| TIAL1                                                     | ENSG00000151923 | no      | Homo_sapiens | CUUUC   | 5      | 8576255          | RRM                 | 43            | 3.749       | 4.502 | 3.714  | SELEX of 68nt random with recombinant protein. Winners confirmed by UV cross-linking and competition assay.                     |
| YTHDC1                                                    | ENSG00000083896 | no      | Homo_sapiens | GAGUGC  | 6      | 20167602         | YTH                 | 9             | 6.362       | 6.383 | 6.171  | SELEX                                                                                                                           |
| ZFP36                                                     | ENSG00000128016 | no      | Homo_sapiens | ACUUUC  | 6      | 18367721         | ZF_CCCH             | 42            | 45444       | 6.672 | 6.084  | RIP-chip                                                                                                                        |
| RBMX                                                      | ENSG00000147274 | no      | Homo_sapiens | AAGU    | 4      | 12761049         | RRM                 | 22            | 2.322       | 2.427 | 2.117  | Mutagenesis;Deletion analysis                                                                                                   |
| HNRNPH1                                                   | ENSG00000169045 | no      | Homo_sapiens | GGGA    | 4      | 11847131;9343212 | ZF_RNPHF            | 5             | 1.877       | 2.062 | 2.224  | snRNA inactivation in HeLa cell nuclear extract;Western blot                                                                    |
| <b>&gt;SL7159-7184</b> <b>apical loop - marked in red</b> |                 |         |              |         |        |                  |                     |               |             |       |        |                                                                                                                                 |
| GCUCACUGUGUCUAU <b>UAGCU</b> UGGCAUAACGGGGAGC             |                 |         |              |         |        |                  |                     |               |             |       |        |                                                                                                                                 |
| Gene name                                                 | Gene id         | Mutated | Organism     | Motif   | Length | Reference        | Domain              | Quality_score | Experiments |       |        |                                                                                                                                 |
| CEL1                                                      | ENSG00000149187 | no      | Homo_sapiens | UGUGU   | 5      | 16938098         | RRM                 | 6             | 3.975       | 4.927 | 3.822  | SELEX of 35nt random with recombinant protein. Surface plasmon resonance and EMSA.                                              |
| CEL2                                                      | ENSG00000048740 | no      | Homo_sapiens | UGUGU   | 5      | 15657417         | RRM                 | 6             | 3.975       | 4.927 | 3.822  | SELEX of 20nt random with recombinant protein, some winner sequences are verified by EMSA.                                      |
| CEL2                                                      | ENSG00000048740 | no      | Homo_sapiens | UGUGU   | 5      | 11931771         | RRM                 | 6             | 3.975       | 4.927 | 3.822  | UV crosslink, western blot, immunoprecipitation in HeLa nuclear extracts.                                                       |
| GRSF1                                                     | ENSG00000132463 | no      | Homo_sapiens | GGGGA   | 5      | 17337441         | RRM                 | 29            | 44652       | 4.502 | 4.937  | protein affinity purification                                                                                                   |
| HNRNPF                                                    | ENSG00000169813 | no      | Homo_sapiens | GGGGA   | 5      | 17337441         | RRM;ZF_RNPHF        | 29            | 44652       | 4.502 | 4.937  | protein affinity purification                                                                                                   |
| HNRNPF                                                    | ENSG00000169813 | no      | Homo_sapiens | GGGGA   | 5      | 16885237         | RRM;ZF_RNPHF        | 29            | 44652       | 4.502 | 4.937  | NMR titration using recombinant protein                                                                                         |
| HNRNPF                                                    | ENSG00000169813 | no      | Homo_sapiens | GGGGA   | 5      | 11571276         | RRM;ZF_RNPHF        | 29            | 44652       | 4.502 | 4.937  | RNA affinity binding assays, immunoblot with WT HeLa nuclear extracts or depleted by RNA                                        |
| HNRNPH1                                                   | ENSG00000169045 | no      | Homo_sapiens | GGGGA   | 5      | 17337441         | ZF_RNPHF            | 29            | 44652       | 4.502 | 4.937  | affinity chromatography.                                                                                                        |
| HNRNPH1                                                   | ENSG00000169045 | no      | Homo_sapiens | GGGGA   | 5      | 20028692         | ZF_RNPHF            | 29            | 44652       | 4.502 | 4.937  | protein affinity purification                                                                                                   |
| HNRNPH1                                                   | ENSG00000169045 | no      | Homo_sapiens | GGGGA   | 5      | 11571276         | ZF_RNPHF            | 29            | 44652       | 4.502 | 4.937  | EMSA, UV cross-linking, immunoprecipitation and Western blotting with HEK293T nuclear extract                                   |
| HNRNPH2                                                   | ENSG00000126945 | no      | Homo_sapiens | GGGGA   | 5      | 17337441         | ZF_RNPHF            | 29            | 44652       | 4.502 | 4.937  | RNA affinity binding assays, immunoblot with WT HeLa nuclear extracts or depleted by RNA                                        |
| HNRNPH2                                                   | ENSG00000126945 | no      | Homo_sapiens | GGGGA   | 5      | 20028692         | ZF_RNPHF            | 29            | 44652       | 4.502 | 4.937  | affinity chromatography.                                                                                                        |
| HNRNPH2                                                   | ENSG00000126945 | no      | Homo_sapiens | GGGGA   | 5      | 11571276         | ZF_RNPHF            | 29            | 44652       | 4.502 | 4.937  | protein affinity purification                                                                                                   |
| HNRNPH3                                                   | ENSG00000096746 | no      | Homo_sapiens | GGGGA   | 5      | 17337441         | RRM                 | 29            | 44652       | 4.502 | 4.937  | EMSA, UV cross-linking, immunoprecipitation and Western blotting with HEK293T nuclear extract                                   |
| HNRNPH3                                                   | ENSG00000096746 | no      | Homo_sapiens | GGGGA   | 5      | 20028692         | RRM                 | 29            | 44652       | 4.502 | 4.937  | RNA affinity binding assays, immunoblot with WT HeLa nuclear extracts or depleted by RNA                                        |
| HNRNPH3                                                   | ENSG00000096746 | no      | Homo_sapiens | GGGGA   | 5      | 11571276         | RRM                 | 29            | 44652       | 4.502 | 4.937  | affinity chromatography.                                                                                                        |
| KHSRP                                                     | ENSG00000088247 | no      | Homo_sapiens | UUAG    | 4      | 18684992         | KH                  | 14            | 3.305       | 4.513 | 29983  | NMR                                                                                                                             |
| NOVA1                                                     | ENSG00000139910 | no      | Homo_sapiens | UCAC    | 4      | 10811881         | KH                  | 2             | 3.035       | 3.033 | 2.907  | SELEX                                                                                                                           |
| NOVA1                                                     | ENSG00000139910 | no      | Homo_sapiens | UGUGU   | 5      | 17655233         | KH                  | 6             | 3.975       | 4.927 | 3.822  | NMR titrations using recombinant protein                                                                                        |
| NOVA1                                                     | ENSG00000139910 | no      | Homo_sapiens | UCAC    | 4      | 17655233         | KH                  | 2             | 3.035       | 3.033 | 2.907  | NMR                                                                                                                             |
| NOVA2                                                     | ENSG00000104967 | no      | Homo_sapiens | UCAC    | 4      | 10811881         | KH                  | 2             | 3.035       | 3.033 | 2.907  | SELEX                                                                                                                           |
| OAS1                                                      | ENSG00000089127 | no      | Homo_sapiens | GCAUAA  | 6      | 23319625         | OAS1_C;NTP_TRANSF_2 | 22            | 7.949       | 8.637 | 7.416  | X-RAY DIFFRACTION                                                                                                               |
| PIWIL1                                                    | ENSG00000125207 | no      | Homo_sapiens | GCUU    | 4      | 21193640         | GAGE;PAZ;PIWI       | 17            | 2.911       | 3.115 | 2.936  | X-RAY DIFFRACTION                                                                                                               |
| PTBP1                                                     | ENSG00000011304 | no      | Homo_sapiens | CUCA    | 4      | 16179478         | RRM                 | 1             | 2.569       | 2.544 | 43953  | NMR                                                                                                                             |
| PTBP1                                                     | ENSG00000011304 | no      | Homo_sapiens | CUAU    | 4      | 16179478         | RRM                 | 11            | 3.568       | 3.666 | 3.185  | NMR                                                                                                                             |
| PTBP1                                                     | ENSG00000011304 | no      | Homo_sapiens | CUGU    | 4      | 16179478         | RRM                 | 5             | 2.346       | 2.568 | 2.373  | NMR                                                                                                                             |
| PTBP1                                                     | ENSG00000011304 | no      | Homo_sapiens | CUUG    | 4      | 16179478         | RRM                 | 18            | 27791       | 3.131 | 2.682  | NMR                                                                                                                             |
| PTBP1                                                     | ENSG00000011304 | no      | Homo_sapiens | UCUAU   | 5      | 16179478         | RRM                 | 10            | 5.321       | 5.712 | 4.826  | NMR                                                                                                                             |
| SRP19                                                     | ENSG00000153037 | no      | Homo_sapiens | GAGC    | 4      | 11641499         | SRP19               | 32            | 2.775       | 2.336 | 3.283  | X-RAY DIFFRACTION                                                                                                               |
| SRP19                                                     | ENSG00000153037 | no      | Homo_sapiens | GGAGC   | 5      | 20179341         | SRP19               | 31            | 4.362       | 3.741 | 12905  | X-RAY DIFFRACTION                                                                                                               |
| SRP54                                                     | ENSG00000100883 | no      | Homo_sapiens | GGAGC   | 5      | 12244299         | SRP54,SRP_SPB       | 31            | 4.362       | 3.741 | 12905  | X-RAY DIFFRACTION                                                                                                               |
| SRP68                                                     | ENSG00000167881 | no      | Homo_sapiens | GGAGC   | 5      | 24700861         | SRP68               | 31            | 4.362       | 3.741 | 12905  | X-RAY DIFFRACTION                                                                                                               |

|         |                 |    |              |       |   |                      |          |    |       |       |       |                                                                                                                                                                                                                                   |
|---------|-----------------|----|--------------|-------|---|----------------------|----------|----|-------|-------|-------|-----------------------------------------------------------------------------------------------------------------------------------------------------------------------------------------------------------------------------------|
| SRSF5   | ENSG00000100650 | no | Homo_sapiens | ACGGG | 5 | 9649504              | RRM      | 27 | 6.383 | 5.835 | 7.289 | Functional SELEX of constructs with 20nt random by splicing in HeLa S100 extracts complemented by recombinant protein. Consensus motif: ACDGS. UV crosslink, competition and immunoprecipitation assays in HeLa nuclear extracts. |
| TIAL1   | ENSG00000151923 | no | Homo_sapiens | AUUA  | 4 | 8576255              | RRM      | 13 | 2.978 | 3.816 | 2.388 | SELEX of 68nt random with recombinant protein. Winners confirmed by UV cross-linking and competition assay.                                                                                                                       |
| SRSF2   | ENSG00000161547 | no | Homo_sapiens | UUAG  | 4 | 10022872;9710624;762 | RRM      | 14 | 3.305 | 4.513 | 29983 | In vitro splicing assays and RNA competition assays                                                                                                                                                                               |
| HNRNPA1 | ENSG00000135486 | no | Homo_sapiens | UUAG  | 4 | 10022872;9710624;762 | RRM      | 14 | 3.305 | 4.513 | 29983 | In vitro splicing assays and RNA competition assays                                                                                                                                                                               |
| HNRNPH1 | ENSG00000169045 | no | Homo_sapiens | GGGG  | 4 | 15506926             | ZF_RNPHF | 29 | 2.281 | 2.781 | 3.182 | Immunoprecipitation;UV cross-linking                                                                                                                                                                                              |
| HNRNPH1 | ENSG00000169045 | no | Homo_sapiens | GGGA  | 4 | 11847131;9343212     | ZF_RNPHF | 30 | 2.387 | 2.572 | 2.734 | snRNA inactivation in HeLa cell nuclear extract;Western blot                                                                                                                                                                      |
| NOVA1   | ENSG00000139910 | no | Homo_sapiens | UCAC  | 4 | 15367696             | KH       | 2  | 3.035 | 3.033 | 2.907 | RNA affinity binding assays                                                                                                                                                                                                       |

| >SL7247-7291                                 |                 |         |              |         |        |           |                          |               |             |       |        |                                                                                                 |
|----------------------------------------------|-----------------|---------|--------------|---------|--------|-----------|--------------------------|---------------|-------------|-------|--------|-------------------------------------------------------------------------------------------------|
| UUUGACCCUCCCGCGUUUUC AACUCUACGCAAGGAUGGUUGGA |                 |         |              |         |        |           |                          |               |             |       |        |                                                                                                 |
| Gene name                                    | Gene id         | Mutated | Organism     | Motif   | Length | Reference | Domain                   | Quality_score | Experiments |       |        |                                                                                                 |
| AGO1                                         | ENSG00000092847 | no      | Homo_sapiens | ACUCU   | 5      | 15152257  | PAZ;PIWI                 | 22            | 4.581       | 4.823 | 16893  | X-RAY DIFFRACTION                                                                               |
| DHX9                                         | ENSG00000135829 | no      | Homo_sapiens | CGCG    | 4      | 23361462  | DEAD;DSRM;HA2;HELICASE   | 12            | 4.393       | 45017 | 6.511  | X-RAY DIFFRACTION                                                                               |
| ELAVL1                                       | ENSG00000066044 | no      | Homo_sapiens | UUUU    | 4      | 23519412  | RRM                      | 16            | 0.925       | 2.779 | 0.388  | X-RAY DIFFRACTION                                                                               |
| ELAVL2                                       | ENSG00000107105 | no      | Homo_sapiens | GUUUUC  | 6      | 8497264   | RRM                      | 15            | 5.862       | 7.073 | 5.604  | SELEX of 25nt random with recombinant protein.                                                  |
| F2                                           | ENSG00000180210 | no      | Homo_sapiens | GAAG    | 4      | 18971322  | GLA;KRINGLE;THROMBIN_L33 | 33            | 2.106       | 1.437 | 15738  | X-RAY DIFFRACTION                                                                               |
| OAS1                                         | ENSG00000089127 | no      | Homo_sapiens | UUGA    | 4      | 23319625  | OAS1_C;NTP_TRANSF_2      | 1             | 2.447       | 24139 | 2.104  | X-RAY DIFFRACTION                                                                               |
| PCBP1                                        | ENSG00000169564 | no      | Homo_sapiens | CCCUCCC | 7      | 12011088  | KH                       | 5             | 6.418       | 23924 | 7.307  | Mutational analysis, UV cross-linking, Immunoprecipitation, competition assay in LNCaP extracts |
| PCBP2                                        | ENSG00000197111 | no      | Homo_sapiens | CCCU    | 4      | 17526645  | KH                       | 5             | 1.944       | 2.121 | 2.579  | X-RAY DIFFRACTION                                                                               |
| PCBP2                                        | ENSG00000197111 | no      | Homo_sapiens | CCCUCCC | 7      | 12011088  | KH                       | 5             | 6.418       | 23924 | 7.307  | Mutational analysis, UV cross-linking, Immunoprecipitation, competition assay in LNCaP extracts |
| PCBP2                                        | ENSG00000197111 | no      | Homo_sapiens | CCUCCCC | 7      | 23846655  | KH                       | 6             | 6.529       | 7.351 | 7.511  | RNAcompete                                                                                      |
| PCBP2                                        | ENSG00000197111 | no      | Homo_sapiens | CCCUCCC | 7      | 23846655  | KH                       | 5             | 6.418       | 23924 | 7.307  | RNAcompete                                                                                      |
| PTBP1                                        | ENSG00000011304 | no      | Homo_sapiens | CUCU    | 4      | 16179478  | RRM                      | 23            | 1.934       | 2.321 | 2.053  | SOLUTION NMR                                                                                    |
| PTBP1                                        | ENSG00000011304 | no      | Homo_sapiens | CUCU    | 4      | 16179478  | RRM                      | 23            | 1.934       | 2.321 | 2.053  | NMR                                                                                             |
| PTBP1                                        | ENSG00000011304 | no      | Homo_sapiens | CUAC    | 4      | 16179478  | RRM                      | 25            | 3.294       | 2.735 | 3.283  | NMR                                                                                             |
| PTBP1                                        | ENSG00000011304 | no      | Homo_sapiens | CUCC    | 4      | 16179478  | RRM                      | 7             | 1.914       | 1.989 | 2.244  | NMR                                                                                             |
| PTBP1                                        | ENSG00000011304 | no      | Homo_sapiens | UCUAC   | 5      | 16179478  | RRM                      | 24            | 5.113       | 4.709 | 4.931  | NMR                                                                                             |
| PTBP1                                        | ENSG00000011304 | no      | Homo_sapiens | CCUCC   | 5      | 16179478  | RRM                      | 6             | 3.391       | 3.583 | 26724  | NMR                                                                                             |
| RC3H1                                        | ENSG00000135870 | no      | Homo_sapiens | UUUC    | 4      | 25026078  | ZF_CCCH                  | 17            | 1.836       | 2.797 | 1.596  | X-RAY DIFFRACTION                                                                               |
| SFPQ                                         | ENSG00000116560 | no      | Homo_sapiens | GUGGUUG | 7      | 23846655  | RRM                      | 36            | 8.579       | 8.694 | 8.658  | RNAcompete                                                                                      |
| SRP14                                        | ENSG00000140319 | no      | Homo_sapiens | GUGG    | 4      | 11089964  | SRP14                    | 36            | 2.054       | 1.918 | 2.415  | X-RAY DIFFRACTION                                                                               |
| SRP19                                        | ENSG00000153037 | no      | Homo_sapiens | CCUC    | 4      | 20179341  | SRP19                    | 6             | 1.914       | 1.993 | 2.248  | X-RAY DIFFRACTION                                                                               |
| SRP54                                        | ENSG00000100883 | no      | Homo_sapiens | CCUC    | 4      | 12244299  | SRP54,SRP_SPB            | 6             | 1.914       | 1.993 | 2.248  | X-RAY DIFFRACTION                                                                               |
| SRP68                                        | ENSG00000167881 | no      | Homo_sapiens | CCUC    | 4      | 24700861  | SRP68                    | 6             | 1.914       | 1.993 | 2.248  | X-RAY DIFFRACTION                                                                               |
| SRSF1                                        | ENSG00000136450 | no      | Homo_sapiens | CGCAGGA | 7      | 16825284  | RRM                      | 28            | 9.471       | 30895 | 11.156 | SELEX                                                                                           |
| SRSF1                                        | ENSG00000136450 | no      | Homo_sapiens | CGCAGGA | 7      | 16825284  | RRM                      | 28            | 9.471       | 30895 | 11.156 | SELEX                                                                                           |
| SRSF1                                        | ENSG00000136450 | no      | Homo_sapiens | CCCCGCG | 7      | 16825284  | RRM                      | 9             | 8.856       | 33817 | 11.683 | SELEX                                                                                           |

|        |                 |    |              |         |   |                   |         |    |       |       |        |                                                                                                                                                                                                                                   |
|--------|-----------------|----|--------------|---------|---|-------------------|---------|----|-------|-------|--------|-----------------------------------------------------------------------------------------------------------------------------------------------------------------------------------------------------------------------------------|
| SRSF5  | ENSG00000100650 | no | Homo_sapiens | GcAGG   | 5 | 9649504           | RRM     | 29 | 3.679 | 3.701 | 4.339  | Functional SELEX of constructs with 20nt random by splicing in HeLa S100 extracts complemented by recombinant protein. Consensus motif: ACDGS. UV crosslink, competition and immunoprecipitation assays in HeLa nuclear extracts. |
| SRSF9  | ENSG00000111786 | no | Homo_sapiens | AGGAA   | 5 | 17548433          | RRM     | 31 | 26359 | 3.415 | 3.764  | SELEX of 20nt random with recombinant protein. Consensus motif: AGGAC. EMSA, UV crosslink, SDS-PAGE with HeLa nuclear extracts.                                                                                                   |
| SSB    | ENSG00000138385 | no | Homo_sapiens | UUUU    | 4 | 18547518          | LA;RRM  | 16 | 0.925 | 2.779 | 0.388  | X-RAY DIFFRACTION                                                                                                                                                                                                                 |
| TIA1   | ENSG00000116001 | no | Homo_sapiens | GUUUUC  | 6 | 8576255           | RRM     | 15 | 5.862 | 7.073 | 5.604  | SELEX of 68nt random with recombinant protein. Winners confirmed by UV cross-linking and competition assay.                                                                                                                       |
| TIA1   | ENSG00000151923 | no | Homo_sapiens | GUUUUC  | 6 | 8576255           | RRM     | 15 | 5.862 | 7.073 | 5.604  | SELEX of 68nt random with recombinant protein. Winners confirmed by UV cross-linking and competition assay.                                                                                                                       |
| TRA2B  | ENSG00000136527 | no | Homo_sapiens | UCAAC   | 5 | 20926394          | RRM     | 19 | 5.221 | 4.469 | 5.241  | NMR spectroscopy                                                                                                                                                                                                                  |
| XPO5   | ENSG00000124571 | no | Homo_sapiens | CCGC    | 4 | 19965479          | XPO1    | 11 | 3.417 | 2.952 | 4.992  | X-RAY DIFFRACTION                                                                                                                                                                                                                 |
| XPO5   | ENSG00000124571 | no | Homo_sapiens | GUUU    | 4 | 19965479          | XPO1    | 15 | 2.194 | 44077 | 1.898  | X-RAY DIFFRACTION                                                                                                                                                                                                                 |
| ZFP36  | ENSG00000128016 | no | Homo_sapiens | CCCUCC  | 6 | 18367721          | ZF_CCCH | 5  | 5.132 | 5.729 | 6.041  | RIP-chip                                                                                                                                                                                                                          |
| ZNF346 | ENSG00000113761 | no | Homo_sapiens | GUGGU   | 5 | 24521053          | ZF_C2H2 | 36 | 4.396 | 4.307 | 4.398  | SOLUTION NMR                                                                                                                                                                                                                      |
| RBMX   | ENSG00000147274 | no | Homo_sapiens | AAGU    | 4 | 12761049          | RRM     | 34 | 2.484 | 2.589 | 2.279  | Mutagenesis;Deletion analysis                                                                                                                                                                                                     |
| SRSF1  | ENSG00000136450 | no | Homo_sapiens | CGCAGGA | 7 | 11967553;12824367 | RRM     | 28 | 9.471 | 30895 | 11.156 | SELEX                                                                                                                                                                                                                             |

\* mutated target gene
