# Supplementary material for: New RNA Structural Elements Identified in the Coding Region of the Coxsackie B3 Virus Genome
Source: MDPI journal article supplement (doi:10.3390/v12111232), 2020-10-30
Supplement: s1 [file s1]

**SM5-A Table.** The top candidate proteins' lists. The MS data from the RNA-centric affinity chromatography experiment is included in the table. The table shows total numbers of MS matches/hits for each candidate protein as well as number of hits after correction with the control reaction (red font).

| No | ID        | Gene name                     | Protein name                                          | MS spectra numbers |        |                    |
|----|-----------|-------------------------------|-------------------------------------------------------|--------------------|--------|--------------------|
|    |           |                               |                                                       | BEADS              | F10RNA | F10RNA minus beads |
| 1  | P19338    | NCL                           | Nucleolin                                             | 6                  | 73     | 67                 |
| 2  | P09429    | HMGB1 HMG1                    | High mobility group protein B1                        | 3                  | 60     | 57                 |
| 3  | P61978    | HNRNPK HNRPK                  | Heterogeneous nuclear ribonucleoprotein K             | 12                 | 60     | 48                 |
| 4  | Q96AE4    | FUBP1                         | Far upstream element-binding protein 1                | 5                  | 53     | 48                 |
| 5  | Q92945    | KHSRP FUBP2                   | Far upstream element-binding protein 2                | 1                  | 46     | 45                 |
| 6  | P62280    | RPS11                         | 40S ribosomal protein S11                             | 2                  | 25     | 23                 |
| 7  | P62701    | RPS4X CCG2, RPS4, SCAR        | 40S ribosomal protein S4, X isoform                   | 3                  | 23     | 20                 |
| 8  | P26373    | RPL13 BBC1, OK/SW-cl.46       | 60S ribosomal protein L13                             | 1                  | 19     | 18                 |
| 9  | P62269    | RPS18 D6S218E                 | 40S ribosomal protein S18                             | 4                  | 21     | 17                 |
| 10 | P09651    | HNRNPA1 HNRPA1                | Heterogeneous nuclear ribonucleoprotein A1            | 2                  | 18     | 16                 |
| 11 | P62753    | RPS6 OK/SW-cl.2               | 40S ribosomal protein S6                              | 2                  | 18     | 16                 |
| 12 | P61247    | RPS3A FTE1, MFTL              | 40S ribosomal protein S3a                             | 1                  | 17     | 16                 |
| 13 | P06748    | NPM1 NPM                      | Nucleophosmin                                         | 5                  | 17     | 12                 |
| 14 | Q13283    | G3BP1 G3BP                    | Ras GTPase-activating protein-binding protein 1       | 2                  | 14     | 12                 |
| 15 | Q13435    | SF3B2 SAP145                  | Splicing factor 3B subunit 2                          | 1                  | 13     | 12                 |
| 16 | P39019    | RPS19                         | 40S ribosomal protein S19                             | 8                  | 19     | 11                 |
| 17 | P26583    | HMGB2 HMG2                    | High mobility group protein B2                        | 4                  | 15     | 11                 |
| 18 | P68371    | TUBB4B TUBB2C                 | Tubulin beta-4B chain                                 | 54                 | 64     | 10                 |
| 19 | P23396    | RPS3 OK/SW-cl.26              | 40S ribosomal protein S3                              | 6                  | 16     | 10                 |
| 20 | P52597    | HNRNPF HNRPF                  | Heterogeneous nuclear ribonucleoprotein F             | 2                  | 12     | 10                 |
| 21 | P47914    | RPL29                         | 60S ribosomal protein L29                             | 1                  | 11     | 10                 |
| 22 | Q13765    | NACA HSD48                    | Nascent polypeptide-associated complex subunit        | 1                  | 10     | 9                  |
| 23 | E9PAV3    | NACA                          | Nascent polypeptide-associated complex subunit        | 1                  | 10     | 9                  |
| 24 | P11940    | PABP1 PAB1, PABP1, PABPC2     | Polyadenylate-binding protein 1                       | 3                  | 10     | 7                  |
| 25 | RS_P29353 | SHC1 SHC, SHCA                | SHC-transforming protein 1                            | 5                  | 12     | 7                  |
| 26 | P31943    | HNRNPH1 HNRPH, HNRPH1         | Heterogeneous nuclear ribonucleoprotein H1            | 2                  | 8      | 6                  |
| 27 | P62241    | RPS8 OK/SW-cl.83              | 40S ribosomal protein S8                              | 1                  | 7      | 6                  |
| 28 | P62851    | RPS25                         | 40S ribosomal protein S25                             | 1                  | 7      | 6                  |
| 29 | P07814    | EPRS1 EPRS, GLNS, PARS, QARS, | Bifunctional glutamate/proline--tRNA ligase           | 2                  | 8      | 6                  |
| 30 | P07437    | TUBB TUBB5, OK/SW-cl.56       | Tubulin beta chain                                    | 61                 | 66     | 5                  |
| 31 | Q15366    | PCBP2                         | Poly(rC)-binding protein 2                            | 12                 | 17     | 5                  |
| 32 | Q8NC51    | SERBP1 PAIRBP1, CGI-55        | Plasminogen activator inhibitor 1 RNA-binding protein | 5                  | 10     | 5                  |
| 33 | Q13263    | TRIM28 KAP1, RNF96, TIF1B     | Transcription intermediary factor 1-beta              | 6                  | 11     | 5                  |
| 34 | P05198    | EIF2S1 EIF2A                  | Eukaryotic translation initiation factor 2 subunit 1  | 2                  | 6      | 4                  |
| 35 | P62244    | RPS15A OK/SW-cl.82            | 40S ribosomal protein S15a                            | 2                  | 6      | 4                  |
| 36 | P60866    | RPS20                         | 40S ribosomal protein S20                             | 1                  | 5      | 4                  |
| 37 | Q15643    | TRIP11 CEV14                  | Thyroid receptor-interacting protein 11               | 4                  | 7      | 3                  |
| 38 | Q16777    | H2AC20 H2AFQ, HIST2H2AC       | Histone H2A type 2-C                                  | 1                  | 4      | 3                  |
| 39 | Q9BTM1    | H2AJ H2AFJ                    | Histone H2AJ                                          | 1                  | 4      | 3                  |
| 40 | Q6F113    | H2AC18, H2AC19                | Histone H2A type 2-A                                  | 1                  | 4      | 3                  |
| 41 | P0C0S8    | H2AC11, H2AC13, H2AC15,       | Histone H2A type 1                                    | 1                  | 4      | 3                  |
| 42 | Q99878    | H2AC14 H2AFE, HIST1H2AJ       | Histone H2A type 1-J                                  | 1                  | 4      | 3                  |
| 43 | Q96KK5    | H2AC12 HIST1H2AH, HIST1H2AI   | Histone H2A type 1-H                                  | 1                  | 4      | 3                  |
| 44 | P20671    | H2AC7 H2AFG, HIST1H2AD        | Histone H2A type 1-D                                  | 1                  | 4      | 3                  |
| 45 | P68104    | EEF1A1 EEF1A, EF1A, LENG7     | Elongation factor 1-alpha 1                           | 11                 | 13     | 2                  |
| 46 | Q5VTE0    | EEF1A1P5 EEF1AL3              | Putative elongation factor 1-alpha-like 3             | 11                 | 13     | 2                  |
| 47 | P46379    | BAG6 BAT3, G3                 | Large proline-rich protein BAG6                       | 10                 | 12     | 2                  |
| 48 | P67809    | YBX1 NSEP1, YB1               | Nuclease-sensitive element-binding protein 1          | 7                  | 9      | 2                  |
| 49 | P62829    | RPL23                         | 60S ribosomal protein L23                             | 2                  | 4      | 2                  |
| 50 | P60903    | S100A10 ANX2LG, CAL1L, CLP11  | Protein S100-A10                                      | 1                  | 3      | 2                  |
| 51 | P62266    | RPS23                         | 40S ribosomal protein S23                             | 1                  | 3      | 2                  |
| 52 | O75822    | EIF3J EIF3S1, PRO0391         | Eukaryotic translation initiation factor 3 subunit J  | 1                  | 3      | 2                  |
| 53 | P42166    | TMPO LAP2                     | Lamina-associated polypeptide 2, isoform alpha        | 1                  | 3      | 2                  |
| 54 | Q9BQE3    | TUBA1C TUBA6                  | Tubulin alpha-1C chain                                | 37                 | 38     | 1                  |
| 55 | Q71U36    | TUBA1A TUBA3                  | Tubulin alpha-1A chain                                | 37                 | 38     | 1                  |
| 56 | P68363    | TUBA1B                        | Tubulin alpha-1B chain                                | 37                 | 38     | 1                  |
| 57 | P52272    | HNRNPM HNRPM, NAGR1           | Heterogeneous nuclear ribonucleoprotein M             | 32                 | 33     | 1                  |
| 58 | Q9H853    | TUBA4B TUBA4                  | Putative tubulin-like protein alpha-4B                | 5                  | 6      | 1                  |
| 59 | Q969Q0    | RPL36AL                       | 60S ribosomal protein L36a-like                       | 7                  | 8      | 1                  |
| 60 | Q14444    | CAPRIN1 GPIAP1, GPIP137,      | Caprin-1                                              | 4                  | 5      | 1                  |
| 61 | O75340    | PDCD6 ALG2                    | Programmed cell death protein 6                       | 5                  | 6      | 1                  |
| 62 | P49588    | AARS1 AARS                    | Alanine-tRNA ligase, cytoplasmic                      | 4                  | 5      | 1                  |
| 63 | P50991    | CCT4 CCTD, SRB                | T-complex protein 1 subunit delta                     | 4                  | 5      | 1                  |
| 64 | P52943    | CRIP2 CRP2                    | Cysteine-rich protein 2                               | 1                  | 2      | 1                  |
| 65 | P08590    | MYL3                          | Myosin light chain 3                                  | 1                  | 2      | 1                  |
| 66 | P05976    | MYL1                          | Myosin light chain 1/3, skeletal muscle isoform       | 1                  | 2      | 1                  |
| 67 | P48643    | CCT5 CTCE, KIAA0098           | T-complex protein 1 subunit epsilon                   | 1                  | 2      | 1                  |
| 68 | P51572    | BCAP31 BAP31, DXS1357E        | B-cell receptor-associated protein 31                 | 2                  | 3      | 1                  |
| 69 | Q9Y224    | RTRAF C14orf166, CGI-99       | RNA transcription, translation and transport factor   | 1                  | 2      | 1                  |
| 70 | Q96DB5    | RTDN1 FAM82B, CGI-90          | Regulator of microtubule dynamics protein 1           | 1                  | 2      | 1                  |
| 71 | P25398    | RPS12                         | 40S ribosomal protein S12                             | 1                  | 2      | 1                  |
| 72 | P49368    | CCT3 CCTG, TRIC5              | T-complex protein 1 subunit gamma                     | 1                  | 2      | 1                  |

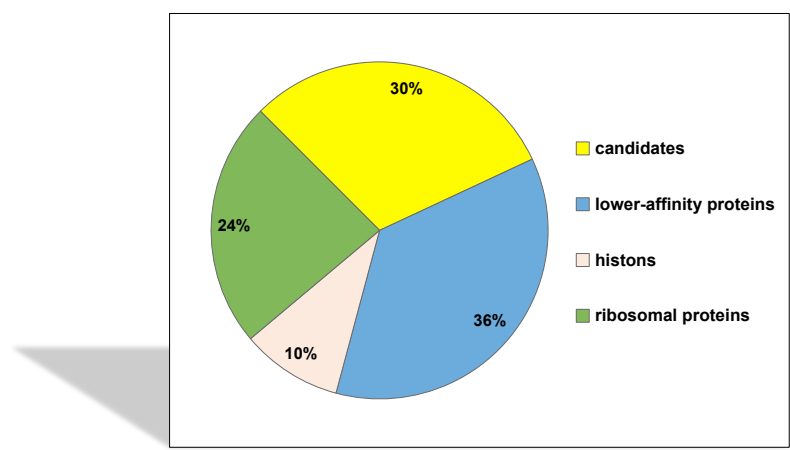

|                         | number of proteins | %        |
|-------------------------|--------------------|----------|
| candidate               | 22                 | 30,55556 |
| lower-affinity proteins | 26                 | 36,11111 |
| histons                 | 7                  | 9,72222  |
| ribosomal proteins      | 17                 | 23,61111 |
| total                   | 72                 | 100      |

**SM5-B. Distribution of proteins identified by F10-CVB3 RNA affinity chromatography and MS analysis for untreated MCF-7 cells.**

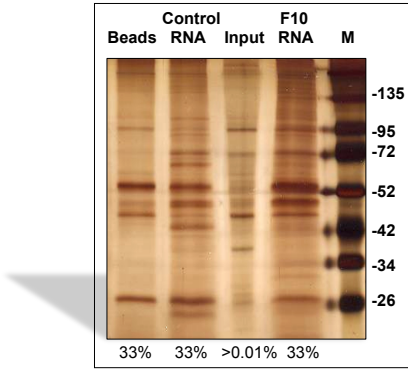

**SM5-C. F10-CVB3 RNA affinity chromatography for untreated MCF-7 cells.** Total cytoplasmic fractions and the protein eluates were incubated for 5 min at 95°C and then loaded on a 10% SDS-PAGE gel. After electrophoresis the gel was silver stained according to manufacturer's protocol (Pierce Silver Stain Kit).

**Figure SM5. RNA affinity chromatography and MS analysis.**
