# Supplementary material for: New RNA Structural Elements Identified in the Coding Region of the Coxsackie B3 Virus Genome
Source: MDPI journal article supplement (doi:10.3390/v12111232), 2020-10-30
Supplement: s1 [file s1]

```

g1 199599827 gb FJ000001.1 /1-82
g1 239916537 gb G0141875.1 /1-82
g1 262283884 gb GU109481.1 /1-82
g1 209984145 gb FJ357838.1 /1-82
g1 137322247 gb U57056.1 |CXU57056|1-82
g1 32342119 gb M16572.1 |CX3SG|1-82
g1 405779213 gb JX312064.1 /1-82
g1 32341919 gb M33854.1 |CX3CG|1-82
SL 665-748/1-82
g1 10863160 gb AF231763.1 /1-82
g1 10863164 gb AF231765.1 /1-82
g1 323432 gb M88483.1 |CXAB3CG|1-82
g1 54399972 gb AY752946.1 /1-82
g1 10863162 gb AF231764.1 /1-82
g1 33535240 gb JN048669.1 /1-82
g1 380082986 gb JQ040513.1 /1-82
g1 335352398 gb JN048468.1 /1-82
g1 54399970 gb AY752945.1 /1-82
g1 303362830 gb AY752944.2 /1-82

```

Poliovirus P3 Leon 37/K01392.1  
Poliovirus strain Sabin 1/V01150.1  
Poliovirus type 2/X00595.1  
Coxsackievirus B2/AF085363.1  
Coxsackievirus B2/X05690.1  
Echovirus 9/X84981.1  
Coxsackievirus B5/X67706.1  
Coxsackievirus 1/M16560  
Coxsackievirus B3 woodruff variant/U57056.1  
SL665-748/1-83  
Coxsackievirus A16 G10/U05876.1  
Enterovirus 71/X84981.1

[illegible][illegible]

CVB3

SL799-854

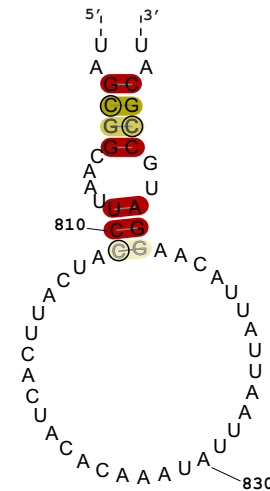

## enteroviruses

SL799-854

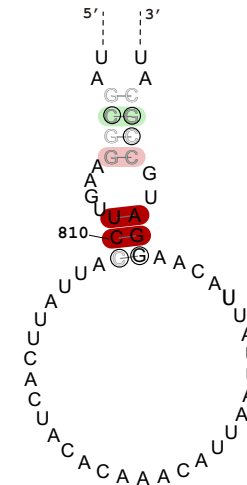

|                       |   | TYPES OF PAIRS |   |   |   |   |   |
|-----------------------|---|----------------|---|---|---|---|---|
|                       |   | 1              | 2 | 3 | 4 | 5 | 6 |
| INCOMPATIBLE<br>PAIRS | 0 |                |   |   |   |   |   |
|                       | 1 |                |   |   |   |   |   |
|                       | 2 |                |   |   |   |   |   |

## SL2313-2343

```

g| 458298 |gb| U05876.1 |CAU05876/1-31
g| 221147 |db| D00538.1 |CXA211CG/1-31
g| 581513 |gb| AF176044.1 |1/1-31
g| 612571 |emb| V01150.1 |1/1-31
g| 332895 |gb| K01392.1 |POL3L37/1-31
g| 61127 |emb| X00595.1 |1/1-31
g| 61031 |emb| X05690.1 |1/1-31
g| 59045 |emb| X67706.1 |1/1-31
g| 323417 |gb| M16560.1 |CXA1G/1-31
g| 4406135 |gb| AF085363.1 |1/1-31
g| 769799 |emb| X84981.1 |1/1-31
g| 1373227 |gb| U57056.1 |CXU57056/1-31
g| 2313-234371 |1-31
g| 40579213 |gb| JX312064.1 |1/1-31

```

[illegible]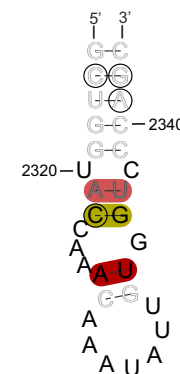

## enteroviruses

|                    |   | TYPES OF PAIRS |   |   |   |   |   |
|--------------------|---|----------------|---|---|---|---|---|
|                    |   | 1              | 2 | 3 | 4 | 5 | 6 |
| INCOMPATIBLE PAIRS | 0 |                |   |   |   |   |   |
|                    | 1 |                |   |   |   |   |   |
|                    | 2 |                |   |   |   |   |   |

SL2562-2590

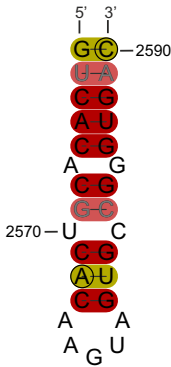

|                  |           |    |            |               |                           |          |             |    |  |
|------------------|-----------|----|------------|---------------|---------------------------|----------|-------------|----|--|
|                  |           |    |            |               | (((((((.....)))))).)))))) |          |             |    |  |
| gj               | 50604532  | gb | AY673831.1 | /1-29         | GGCAGATT                  | TAAGGTG  | GTCCAGTGA   | 29 |  |
| gi               | 1373227   | gb | U57056.1   | CXU57056/1-29 | GTCAACGT                  | CGCAAGTA | GTGCCAGTGAC | 29 |  |
| gi               | 335352400 | gb | JN048469.1 | /1-29         | GTCAACGT                  | CACAAGTA | GTGCCGGTGAC | 29 |  |
| gi               | 380082986 | gb | JQ040513.1 | /1-29         | GTCAACGT                  | CACAAGTA | GTGCCGGTGAC | 29 |  |
| gi               | 335352398 | gb | JN048468.1 | /1-29         | GTCAACGT                  | CACAAGTA | GTGCCGGTGAC | 29 |  |
| gi               | 405779213 | gb | JX312064.1 | /1-29         | GTCAACGT                  | CACAAGTA | GTGCCGGTGAC | 29 |  |
| gi               | 323419    | gb | M33854.1   | CXA3CG/1-29   | GTCAACGT                  | CACAAGTA | GTGCCGGTGAC | 29 |  |
| gi               | 10863162  | gb | AF231764.1 | /1-29         | GTCAACGT                  | CACAAGTA | GTGCCGGTGAC | 29 |  |
| gi               | 10863160  | gb | AF231763.1 | /1-29         | GTCAACGT                  | CACAAGTA | GTGCCGGTGAC | 29 |  |
| gi               | 10863164  | gb | AF231765.1 | /1-29         | GTCAACGT                  | CACAAGTA | GTGCCGGTGAC | 29 |  |
| gi               | 303362830 | gb | AY752944.2 | /1-29         | GTCAACGT                  | CACAAGTA | GTGCCGGTGAC | 29 |  |
| gi               | 54399970  | gb | AY752945.1 | /1-29         | GTCAACGT                  | CACAAGTA | GTGCCGGTGAC | 29 |  |
| gi               | 323421    | gb | M16572.1   | CXA3G/1-29    | GTCAACGT                  | CACAAGTA | GTGCCGGTGAC | 29 |  |
| gi               | 323432    | gb | M88483.1   | CXAB3CG/1-29  | GTCAACGT                  | CACAAGTA | GTGCCGGTGAC | 29 |  |
| gi               | 54399972  | gb | AY752946.1 | /1-29         | GTCAACGT                  | CACAAGTA | GTGCCGGTGAC | 29 |  |
| SL2562-2590/1-29 |           |    |            |               | GUCAGCGUA                 | CACAAGUA | GUGCCGGUGAC | 29 |  |
|                  |           |    |            |               | .....10.....20.....       |          |             |    |  |

CVB3

|                    | TYPES OF PAIRS |   |   |   |   |   |
|--------------------|----------------|---|---|---|---|---|
|                    | 1              | 2 | 3 | 4 | 5 | 6 |
| INCOMPATIBLE PAIRS | 0              |   |   |   |   |   |
|                    | 1              |   |   |   |   |   |
|                    | 2              |   |   |   |   |   |

## SL2664-2719

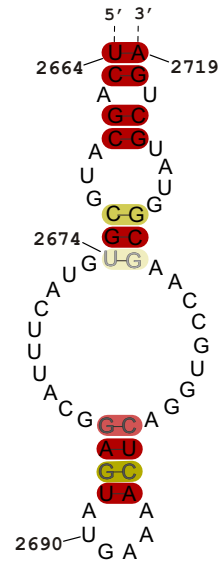

SL2664-2719/1-56

|    |       |        |    |            |                |
|----|-------|--------|----|------------|----------------|
| 91 | 2399  | 165337 | gb | GU141875.1 | /1-102         |
| 91 | 2622  | 83884  | gb | GU109481.1 | /1-102         |
| 91 | 2099  | 81445  | gb | FJ357838   | /1-102         |
| 91 | 1583  | 23845  | gb | EU14042.1  | /1-102         |
| 91 | 5060  | 4532   | gb | AY673831.1 | /1-102         |
| 91 | 1373  | 2227   | gb | AY57056.1  | CXU57056/1-102 |
| 91 | 3234  | 1919   | gb | M33854.1   | CXA33C/1-102   |
| 91 | 10863 | 162    | gb | AF231764.1 | /1-102         |
| 91 | 10863 | 164    | gb | AF231765.1 | /1-102         |
| 91 | 2234  | 3099   | gb | M88483.1   | CXAB33C/1-102  |
| 91 | 2433  | 3099   | gb | AY752946.1 | /1-102         |
| 91 | 3353  | 52400  | gb | JN048469.1 | /1-102         |
| 91 | 3800  | 82986  | gb | Q040513.1  | /1-102         |
| 91 | 33352 | 298    | gb | JN048468.1 | /1-102         |
| 91 | 4057  | 7213   | gb | JX312064.1 | /1-102         |
| 91 | 10863 | 160    | gb | AF231763.1 | /1-102         |
| 91 | 3036  | 2830   | gb | AY52944.2  | /1-102         |
| 91 | 4339  | 9970   | gb | AY752945.1 | /1-102         |
| 91 | 3234  | 211    | gb | M16572.1   | CXA33C/1-102   |

[illegible]

## CVB3

|                    |   | TYPES OF PAIRS |   |   |   |   |   |
|--------------------|---|----------------|---|---|---|---|---|
|                    |   | 1              | 2 | 3 | 4 | 5 | 6 |
| INCOMPATIBLE PAIRS | 0 |                |   |   |   |   |   |
|                    | 1 |                |   |   |   |   |   |
|                    | 2 |                |   |   |   |   |   |

## SL4558-4656

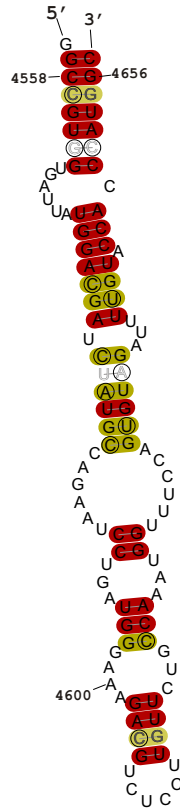

|                    |   | TYPES OF PAIRS |   |   |   |   |   |
|--------------------|---|----------------|---|---|---|---|---|
|                    |   | 1              | 2 | 3 | 4 | 5 | 6 |
| INCOMPATIBLE PAIRS | 0 |                |   |   |   |   |   |
|                    | 1 |                |   |   |   |   |   |
|                    | 2 |                |   |   |   |   |   |

```

g1 | 239916 | gb | GQ141875.1 | /1-102
g1 | 262283884 | gb | GJ109481.1 | /1-102
g1 | 29096814445 | gb | FJ357838.1 | /1-102
g1 | 158323845 | gb | EU144042.1 | /1-102
g1 | 50604532 | gb | AY673831.1 | /1-102
g1 | 1373227 | gb | U57056.1 | CXU57056/1-102
g1 | 323419 | gb | M33854.1 | CXA3CG/1-102
g1 | 10863162 | gb | AF231764.1 | /1-102
g1 | 10863164 | gb | AF231765.1 | /1-102
SL | 4551-4651 | /1-102
g1 | 323432 | gb | M88483.1 | CXAB3CG/1-102
g1 | 54399972 | gb | AY52946.1 | /1-102
g1 | 335352400 | gb | JN048469.1 | /1-102
g1 | 380082986 | gb | JQ040513.1 | /1-102
g1 | 335352398 | gb | JN048468.1 | /1-102
g1 | 405779213 | gb | JX312064.1 | /1-102
g1 | 10863160 | gb | AF231763.1 | /1-102
g1 | 303362830 | gb | AY752944.2 | /1-102
g1 | 54399970 | gb | AY752945.1 | /1-102
g1 | 323421 | gb | M16572.1 | CXA3G/1-102

```

CVB3

Echovirus 9 strain Hill/x84981.1  
SL4551-4651/1-102  
Coxsackievirus B5/x67706.1  
Coxsackievirus B2 strain Ohio-1/AF085363.1  
Coxsackievirus 1/M16560

enteroviruses

[illegible][illegible]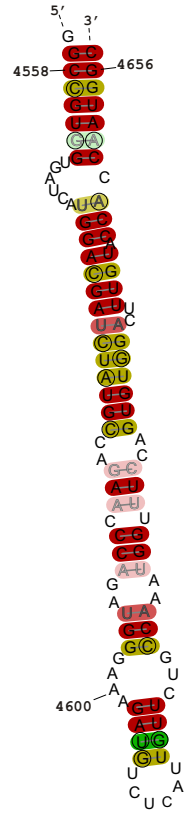

SL4765-4802

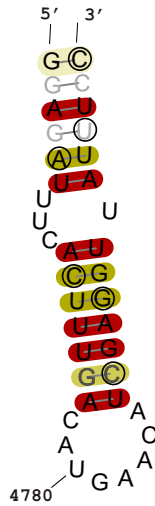

SL4765-4802

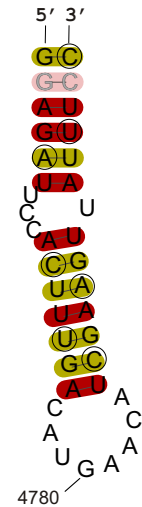

```

q1 1995998827 gb F3000001.1 /1-38
q1 239916537 gb GQ141875.1 /1-38
q1 262283884 gb GP109481.1 /1-38
q1 209981445 gb F357878.1 /1-38
q1 50604532 gb AY673831.1 /1-38
q1 1373227 gb U57056.1 CXU57056/1-38
q1 335352400 gb JN048469.1 /1-38
q1 380082986 gb JQ040513.1 /1-38
q1 335352398 gb JN048468.1 /1-38
q1 405779213 gb JX312064.1 /1-38
q1 3234191 gb M33854.1 CXA3CG/1-38
q1 10863162 gb AF231764.1 /1-38
q1 10863160 gb AF231763.1 /1-38
q1 10863164 gb AF231765.1 /1-38
q1 303362830 gb AY752944.2 /1-38
q1 54399970 gb AY752945.1 /1-38
q1 323421 gb M16572.1 CXA3G/1-38
q1 323432 gb M88483.1 CXAB3CG/1-38
q1 54399972 gb AY752946.1 /1-38
SL4765-4803/1-38

```

CVB3

[illegible]

Coxsackievirus B5|X67706.1  
Coxsackievirus B3 woodruff variant|U57056.1  
Coxsackievirus B2 strain Ohio|AF085363.1  
Echovirus 9 strain Hill|X84981.1  
Coxsackievirus B1|M16560.1  
SL4765-4802/1-38

enteroviruses

|                    |   | TYPES OF PAIRS |   |   |   |   |   |
|--------------------|---|----------------|---|---|---|---|---|
|                    |   | 1              | 2 | 3 | 4 | 5 | 6 |
| INCOMPATIBLE PAIRS | 0 |                |   |   |   |   |   |
|                    | 1 |                |   |   |   |   |   |
|                    | 2 |                |   |   |   |   |   |

((((((...(((((((.....)))))).))))))  
 GAAGAUAUCCUUUGAUAUGAAUAUGAGGUUAUUUUCU 38  
 GAGAGUAUCCUUUGACAUGAAUAUAUUUUUUUUUUUU 38  
 GGAGUAUCCUUUGAUAUGAACAUUGAAGUAUUUUCU 38  
 GAGAGUAUCCUUUGACAUGAACAUUGAAGUAUUUUCU 38  
 GGAGUAUCCUUUGAUAUGAACAUUGAAGUAUUUUCU 38  
 GGAGUAUCCUUUGACAUGAACAUUGAGGUUAUUUUCU 38  
 .....10.....20.....30.....



```

g1 | 2399916537 | gb | GQ141875.1 | /1-19
g1 | 262283884 | gb | GU109481.1 | /1-19
g1 | 209981445 | gb | FJ357838.1 | /1-19
g1 | 50604532 | gb | AY673831.1 | /1-19
g1 | 158323845 | gb | EU144042.1 | /1-19
g1 | 1733227 | gb | U57056.1 | CXU57056-1-19
g1 | 323421 | gb | M16572.1 | CXA3G/1-19
SL6236-6260/1-25
g1 | 333552400 | gb | JN048469.1 | /1-19
g1 | 380082986 | gb | JQ040513.1 | /1-19
g1 | 33352398 | gb | J040518.1 | /1-19
g1 | 405779213 | gb | JX312064.1 | /1-19
g1 | 323419 | gb | M33854.1 | CXA3CG/1-19
g1 | 10863162 | gb | AF231764.1 | /1-19
g1 | 10863160 | gb | AF231763.1 | /1-19
g1 | 10863164 | gb | AF231765.1 | /1-19
g1 | 303362830 | gb | AY752944.2 | /1-19
g1 | 54399970 | gb | AY752945.1 | /1-19
g1 | 323432 | gb | M88483.1 | CXAB3CG/1-19
g1 | 54399972 | gb | AY752946.1 | /1-19

```

[illegible]

# CVB3

|    |           |     |            |               |
|----|-----------|-----|------------|---------------|
| gi | 221147    | dbj | D00538.1   | CXA21CG/1-25  |
| gi | 323895    | gb  | K01392.1   | POL337/1-25   |
| gi | 61127     | emb | X00595.1   | /1-25         |
| gi | 61257     | emb | V01150.1   | /1-25         |
| gi | 59045     | gb  | G67706.1   | /1-25         |
| gi | 4406135   | gb  | AF085363.1 | /1-25         |
| gi | 61031     | emb | X05690.1   | /1-25         |
| gi | 323417    | gb  | M16560.1   | CXA1G/1-25    |
| gi | 767979    | emb | X84981.1   | /1-25         |
| gi | 1373227   | gb  | U57056.1   | CXU57056/1-25 |
| gi | 405779213 | gb  | JX312064.1 | /1-25         |
| gi | 5815313   | gb  | AF176044.1 | /1-25         |
| gi | 458298    | gb  | U05876.1   | CAU05876/1-25 |

A C C C G G A T C T T A G C A C C A G T G C C 25  
 G G C G C A G A T C T G T C A C C A G T G C C 25  
 A C C A T T G A C T T G A C C A C A G T G C T 25  
 A B C A C A T T G T T G T C C A C C A G T G C 25  
 A B C T C C G A T T T A A C A C A A G C G C A 25  
 A G C T C T G A T T T A A C A C A A G C G T G C 25  
 G C T C T G A T T T A A C A C A A C A G T G C G 25  
 G C T C T G A T T T A A C A C A A G C G T G C 25  
 G C T C T G A T T T A A C A C A A G C G T G C 25  
 G C T C T G A T T T A A C A C A A G C G T G C 25  
 G C G C T G A T C T A A C A C A A G C G T G C 25  
 A B C T A A G A T C T T C A C A C A A G T G C 25  
 G G C A T T G A T C T C C A C A C A A G C G G 25  
 . . . . . 10 . . . . . 20 . . . . .

# enteroviruses

SL6236-6260

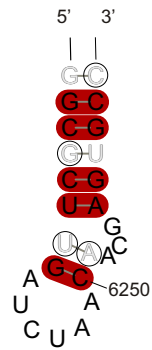

SL6236-6260

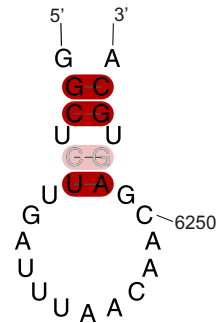

|                       |   |                |   |   |   |   |   |
|-----------------------|---|----------------|---|---|---|---|---|
|                       |   | TYPES OF PAIRS |   |   |   |   |   |
|                       |   | 1              | 2 | 3 | 4 | 5 | 6 |
| INCOMPATIBLE<br>PAIRS | 0 |                |   |   |   |   |   |
|                       | 1 |                |   |   |   |   |   |
|                       | 2 |                |   |   |   |   |   |



CVB3

## enteroviruses

|                       |   | TYPES OF PAIRS |   |   |   |   |   |
|-----------------------|---|----------------|---|---|---|---|---|
|                       |   | 1              | 2 | 3 | 4 | 5 | 6 |
| INCOMPATIBLE<br>PAIRS | 0 |                |   |   |   |   |   |
|                       | 1 |                |   |   |   |   |   |
|                       | 2 |                |   |   |   |   |   |

SL6289-6308

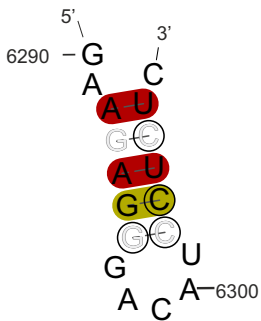

SL6289-6308

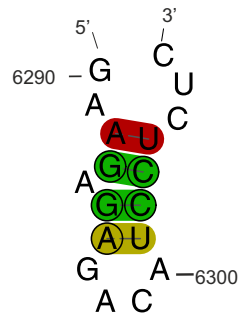

SL6376-6399

CVB3

((((((((.....)))))).)))

[illegible]

.....10.....20.....

SL6376-6399

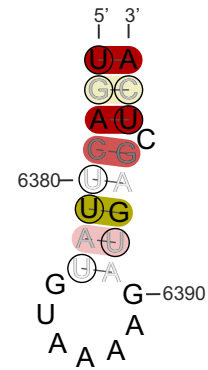

|                       |   | TYPES OF PAIRS |   |   |   |   |   |
|-----------------------|---|----------------|---|---|---|---|---|
|                       |   | 1              | 2 | 3 | 4 | 5 | 6 |
| INCOMPATIBLE<br>PAIRS | 0 |                |   |   |   |   |   |
|                       | 1 |                |   |   |   |   |   |
|                       | 2 |                |   |   |   |   |   |

```

g1| 239916537| gb| G0141875.1| /1-22
g1| 262283884| gb| G0109481.1| /1-22
g1| 209981445| gb| FJ357838.1| /1-22
g1| 158323845| gb| EU144042.1| /1-22
g1| 50604532| gb| AY673831.1| /1-22
g1| 13732271| gb| U57056.1| CXU57056/1-22
SL6476-6495|
g1| 32352400| gb| JN048469.1| /1-22
g1| 380082986| gb| JQ040513.1| /1-22
g1| 33532398| gb| JN048468.1| /1-22
g1| 405779213| gb| JX312064.1| /1-22
g1| 323419| gb| M33854.1| CXA3CG/1-22
g1| 10863162| gb| AF231764.1| /1-22
g1| 10863160| gb| AF231763.1| /1-22
g1| 10863164| gb| AF231765.1| /1-22
g1| 303362830| gb| AY752944.2| /1-22
g1| 54399970| gb| AY752945.1| /1-22
g1| 323421| gb| M16572.1| CXA3G/1-22
g1| 323432| gb| M88483.1| CXAB3CG/1-22
g1| 54399972| gb| AY752946.1| /1-22

```

[illegible]

## CVB3

```
gi | 405779213 | gb | JX312064.1 | /1-22
gi | 4406135 | gb | AF085363.1 | /1-22
gi | 1373227 | gb | U57056.1 | CXU57056/1-22
gi | 61031 | emb | x05690.1 | /1-22
```

.(((((((.....)).....))))).  
 GACAGACATTGTGTAATCTGTAA 22  
 GGCAGACGTTCCGCAACTCTGTAA 22  
 GACAGACATTGTGTAATCTGTAA 22  
 GGCAAACATTGTGTAATCTGTAA 22  
 .....10.....20.

## enteroviruses

|                    |   | TYPES OF PAIRS |   |   |   |   |   |
|--------------------|---|----------------|---|---|---|---|---|
|                    |   | 1              | 2 | 3 | 4 | 5 | 6 |
| INCOMPATIBLE PAIRS | 0 |                |   |   |   |   |   |
|                    | 1 |                |   |   |   |   |   |
|                    | 2 |                |   |   |   |   |   |

## SL6476-6495

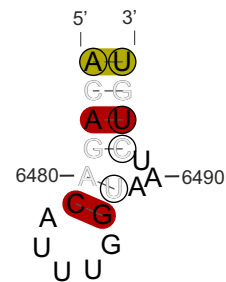

## SL6476-6495

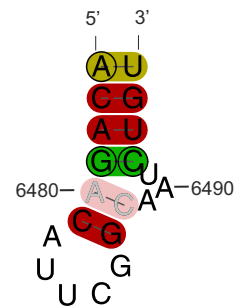

```

g| 239916537|gb|GQ141875.1|/1-17|AATGTCAGATGACATC 17
g| 262283884|gb|GU109481.1|/1-17|AATGTCAGATGACATC 17
g| 209981445|gb|FJ357838.1|/1-17|AATGTCAGATGACATC 17
g| 158323845|gb|EU144042.1|/1-17|TATGTCGTATGCCATC 17
g| 50604552|gb|AY673831.1|/1-17|AATGTCGGATGACATC 17
g| 13732327|gb|U57056.1|CXU57056/1-17|GATGTCGGACGTCATC 17
SL6581-6597|/1-17|GAUGUUGAUGUACAU 17
g| 333552400|gb|JN048469.1|/1-17|GATGTCAGATGACATC 17
g| 380082986|gb|JQ040513.1|/1-17|GATGTCAGATGACATC 17
g| 335352398|gb|JX048468.1|/1-17|GATGTCAGATGACATC 17
g| 405779213|gb|JX312064.1|/1-17|GATGTCAGATGACATC 17
g| 323419|gb|M33854.1|CXA3CG/1-17|GATGTCAGATGACATC 17
g| 10863162|gb|AF231764.1|/1-17|GATGTCAAATGACATC 17
g| 10863160|gb|AF231763.1|/1-17|GATGTCAGATGACATC 17
g| 10863164|gb|AF231765.1|/1-17|GATGTCAAATGACATC 17
g| 303362830|gb|AY752944.2|/1-17|GATGTCAGATGACATC 17
g| 54399970|gb|AY752945.1|/1-17|GATGTCAGATGACATC 17
g| 323421|gb|M16572.1|CXA3G/1-17|GATGTCAGATGACATC 17
g| 323432|gb|M88483.1|CXA3CG/1-17|GATGTCAGATGACATC 17
g| 54399972|gb|AY752946.1|/1-17|GATGTCAGATGACATC 17
.....10.....

```

## CVB3

|    |                                   |                        |    |
|----|-----------------------------------|------------------------|----|
|    |                                   | (((((...)).))))        |    |
| gi | 405779213 gb JX312064.1 /1-17     | GATGTAGATGACATC        | 17 |
| gi | 4406135 gb AF085363.1 /1-17       | GATGCGGATGGTACC        | 17 |
| gi | 323417 gb M16560.1 CXA1G/1-17     | GATGTGGATGGGCATC       | 17 |
| gi | 1373227 gb U57056.1 CXU57056/1-17 | GATGTGGACGGTCATC       | 17 |
| gi | 61031 emb x05690.1 /1-17          | GATGCTAGACGAACATC      | 17 |
| gi | 769799 emb x84981.1 /1-17         | AATGTTGGACGGTCATC      | 17 |
|    |                                   | . . . . . 10 . . . . . |    |

enteroviruses

|                       |   | TYPES OF PAIRS |   |   |   |   |   |
|-----------------------|---|----------------|---|---|---|---|---|
|                       |   | 1              | 2 | 3 | 4 | 5 | 6 |
| INCOMPATIBLE<br>PAIRS | 0 |                |   |   |   |   |   |
|                       | 1 |                |   |   |   |   |   |
|                       | 2 |                |   |   |   |   |   |

## SL6581-6597

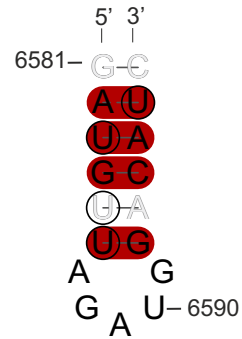

## SL6581-6597

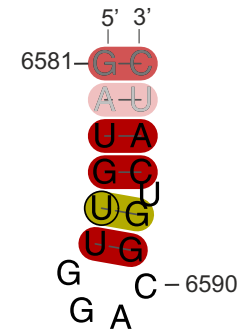

```

q1 158323845 gb EU1440402.1 /1-36
q1 199598827 gb FJ7000001.1 /1-36
q1 239916537 gb GQ141875.1 /1-36
q1 506045532 gb AY673831.1 /1-36
q1 173722277 gb U57056.1 CXU57056/1-36
q1 262283884 gb JQ109481.1 /1-36
q1 209981445 gb FJ357838.1 /1-36
q1 10863164 gb AF231765.1 /1-36
q1 335352400 gb JN048469.1 /1-36
q1 380082986 gb JQ040513.1 /1-36
q1 335352398 gb JN048468.1 /1-36
q1 405779213 gb JX312064.1 /1-36
q1 32341919 gb M33854.1 CXA3CG/1-36
q1 10863162 gb AF231764.1 /1-36
q1 10863160 gb AF231763.1 /1-36
q1 303362830 gb AY752944.2 /1-36
q1 54399970 gb AY752945.1 /1-36
q1 3234211 gb M16572.1 CXA3G/1-36
q1 3234321 gb M88483.1 CXAB3CG/1-36
q1 54399972 gb AY752946.1 /1-36

```

CVB3

[illegible]

SL6689-6722

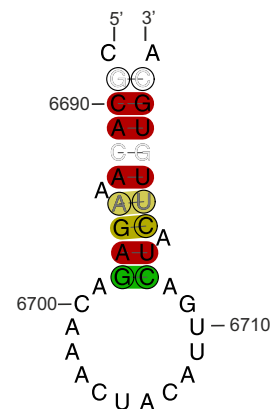

SL6689-6722

```
gi | 59045 | emb | x67706.1 | /1-36
gi | 1373227 | gb | u57056.1 | CXU57056/1-36
gi | 61031 | emb | x05690.1 | /1-36
gi | 405779213 | gb | x312064.1 | /1-36
gi | 769799 | emb | x84981.1 | /1-36
gi | 323417 | gb | M16560.1 | CXA1G/1-36
```

## enteroviruses

|                    |   | TYPES OF PAIRS |   |   |   |   |   |
|--------------------|---|----------------|---|---|---|---|---|
|                    |   | 1              | 2 | 3 | 4 | 5 | 6 |
| INCOMPATIBLE PAIRS | 0 |                |   |   |   |   |   |
|                    | 1 |                |   |   |   |   |   |
|                    | 2 |                |   |   |   |   |   |

.((((((((((...(((...)))))).)).)))))).  
 CU C A A G A G A C C A U U A U A U G A C A U U G U G C A 36  
 CG C A A G A G A C C A U U A U A U G A C A C C U G U C A 36  
 CA C A U A A G A G A C A A C U A C U A U G A C A C U U A U G C A 36  
 CG C A A A G A G A C A A C U A C U A U G A C A C U U G U C A 36  
 CG C A A A G A G A C C A U U A C A U G A C A C C U G U G U A 36  
 CG C A A G A G A C C A U U A C U A U G A C A C C U G U G C A 36  
 .....10.....20.....30.....

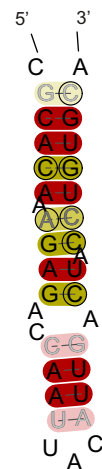

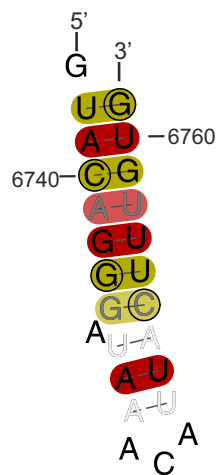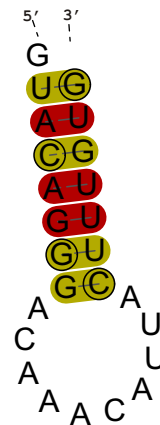

```

q1 | 158323845 | gb | EU144042.1 | /1-25
q1 | 199599827 | gb | FJ0000001.1 | /1-25
q1 | 239916537 | gb | G0141875.1 | /1-25
q1 | 50604532 | gb | AV673831.1 | /1-25
q1 | 1373227 | gb | U57056.1 | CXU57056/1-25
q1 | 262283884 | gb | GU109481.1 | /1-25
q1 | 209981445 | gb | FJ357838.1 | /1-25
q1 | 10863164 | gb | AF231765.1 | /1-25
q1 | 335352400 | gb | JN048469.1 | /1-25
q1 | 380082986 | gb | JQ040513.1 | /1-25
q1 | 335352398 | gb | JN048468.1 | /1-25
q1 | 405779213 | gb | JX312064.1 | /1-25
q1 | 323419 | gb | M33854.1 | CXA3CG/1-25
q1 | 10863162 | gb | AF231764.1 | /1-25
q1 | 10863160 | gb | AF231763.1 | /1-25
q1 | 303362830 | gb | AY752944.2 | /1-25
q1 | 54399970 | gb | AY752945.1 | /1-25
q1 | 323421 | gb | M16572.1 | CXA3G/1-25
q1 | 323432 | gb | M88483.1 | CXAB3CG/1-25
q1 | 54399972 | gb | AY752946.1 | /1-25

```

[illegible]

```
g| 4406135|gb|AF085363.1|/1-25
g| 59045|emb|x67706.1|/1-25
g| 1373227|gb|U57056.1|CXU57056/1-25
g| 405779213|gb|x312064.1|/1-25
g| 769799|emb|x64981.1|/1-25
g| 323417|gb|M16560.1|CXA1G/1-25
g| 61031|emb|x05690.1|/1-25
```

```
g| 4406135|gb|AF085363.1|/1-25
g| 59045|emb|x67706.1|/1-25
g| 1373227|gb|U57056.1|CXU57056/1-25
g| 405779213|gb|x312064.1|/1-25
g| 769799|emb|x64981.1|/1-25
g| 323417|gb|M16560.1|XA1G/1-25
g| 61031|emb|x05690.1|/1-25
```

.(((((((.....)))))))))  
 GTACAGAGACAACACTA CTT GTG 25  
 GTATAGGGACAAGCATT CTT GTG 25  
 GTACAGGACAACACTA CTT GTG 25  
 GTACAGGGATAAACATTA CTT GTG 25  
 GTACAGGGATAAACATTA CTT GTG 25  
 GTACAGGGATAAACATTA CTT GTG 25  
 ATACAGAGACAACACTA CTT GTA 25  
 .....10.....20....

|                    |   | TYPES OF PAIRS |   |   |   |   |   |
|--------------------|---|----------------|---|---|---|---|---|
|                    |   | 1              | 2 | 3 | 4 | 5 | 6 |
| INCOMPATIBLE PAIRS | 0 |                |   |   |   |   |   |
|                    | 1 |                |   |   |   |   |   |
|                    | 2 |                |   |   |   |   |   |

|                    |   | TYPES OF PAIRS |   |   |   |   |   |
|--------------------|---|----------------|---|---|---|---|---|
|                    |   | 1              | 2 | 3 | 4 | 5 | 6 |
| INCOMPATIBLE PAIRS | 0 |                |   |   |   |   |   |
|                    | 1 |                |   |   |   |   |   |
|                    | 2 |                |   |   |   |   |   |

A diagram of a tRNA molecule. The anticodon is shown as 6820 (AUA) and the codon is shown as 5' (UAG). The tRNA is represented by a series of red ovals containing the bases U, A, G, U, A, U, and C. The bases are connected by lines, and the 3' end is labeled 3'.

CVB3

CVB3

enteroviruses

|                       |   |                |        |       |      |      |        |
|-----------------------|---|----------------|--------|-------|------|------|--------|
|                       |   | TYPES OF PAIRS |        |       |      |      |        |
|                       |   | 1              | 2      | 3     | 4    | 5    | 6      |
| INCOMPATIBLE<br>PAIRS | 0 | Red            | Yellow | Green | Cyan | Blue | Purple |
|                       | 1 | Red            | Yellow | Green | Cyan | Blue | Purple |
|                       | 2 | Red            | Yellow | Green | Cyan | Blue | Purple |



SL6854-6878

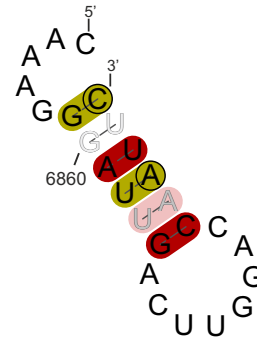

## SL6854-6878

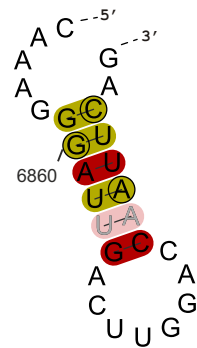[illegible]

## CVB3

SL6854-6878/-JX312064.1|/1-27  
 g1 4406135|gb|AF085363.1|/1-27  
 g1 59045|emb|x67706.1|/1-27  
 g1 1373227|gb|U57056.1|CXU57056/1-27  
 g1 769799|emb|x84981.1|/1-27  
 g1 323417|gb|M16560.1|CXA1G/1-27

.....((((((((((((((((.....)))))))).  
 CAAAGGGATTCACCTTGGACAAATTCAG 27  
 TAAGGGAATTCACCTTGGACAAATTCAG 27  
 CAAAGGGATTCACCTTGGACAAATTCAG 27  
 CAAAGGGATTCACCTTGGACAAATTCAG 27  
 CAAAGGGATTCACCTTGGACAAATTCAG 27  
 CAAAGGGATTCACCTTGGACAAATTCAG 27  
 .....10.....20.....

enteroviruses

|                    |   | TYPES OF PAIRS |   |   |   |   |   |
|--------------------|---|----------------|---|---|---|---|---|
|                    |   | 1              | 2 | 3 | 4 | 5 | 6 |
| INCOMPATIBLE PAIRS | 0 |                |   |   |   |   |   |
|                    | 1 |                |   |   |   |   |   |
|                    | 2 |                |   |   |   |   |   |

[illegible]

CVB3

[illegible]

## enteroviruses

...((((((...)))...)))...  
TATGGTGATGATGATGGATGATGATCATG32  
TATGGTGATGATGATGGATGATGATCCCCA32  
TATGGTGACGACGATGATGGTGACGACCGTG32  
TATGGTGACGACGATGATGGATGATCATG32  
TATGGTGACGATGATGGATGATGACGCGTG32  
TATGGTGATGATGATGGATGATGATCTTG32  
TATGGTGATGATGAATGGTGATCCCCA32  
TATGGTGACGACGATGATGGTGACGACCCCCA32  
TATGGTGACGATGAATAGTTCGATCCCCA32  
TATGGTGACGATGATGGATGATGATCGTG32  
TATGGTGATGATGATGGATGATGATCGTG32  
...10...20...30...

|                    |   | TYPES OF PAIRS |   |   |   |   |   |
|--------------------|---|----------------|---|---|---|---|---|
|                    |   | 1              | 2 | 3 | 4 | 5 | 6 |
| INCOMPATIBLE PAIRS | 0 |                |   |   |   |   |   |
|                    | 1 |                |   |   |   |   |   |
|                    | 2 |                |   |   |   |   |   |

CVB3

enteroviruses

|                    |   | TYPES OF PAIRS |   |   |   |   |   |
|--------------------|---|----------------|---|---|---|---|---|
|                    |   | 1              | 2 | 3 | 4 | 5 | 6 |
| INCOMPATIBLE PAIRS | 0 |                |   |   |   |   |   |
|                    | 1 |                |   |   |   |   |   |
|                    | 2 |                |   |   |   |   |   |

[illegible]

```
SL6987-7036\----JX312064.1|/1-51
gi|44061135|gb|AF085363.1|/1-51
gi|1373227|gb|U57056.1|CXU57056/1-51
gi|61031|emb|x05690.1|/1-51
gi|769799|emb|x84981.1|/1-51
```

.....(((((((.....(((((((.....))))).-.)))))))).)))).  
GATAAAGGGAAGGTCTTTTAAAGAACTACCTTGGAGCAACGCGACTTCTCA51  
GATAAAGGGAAGGTCTTCAATGAACTACCTTGGAGCAATGTCACCTCTCTG51  
GACAAAGGGGAGGTCTTTCAATGAACTACCTTGGAGCAATGTCACCTCTCA51  
GATAAAGGGAAGGTCTTTTAAAGAACTACCTTGGAGCAATGTCACCTTCTCA51  
GATAAAGGGAAGGTCTTCAATGAGGTCACCTTGGAGCAATGTTCTTCACTCA51  
.....10.....20.....30.....40.....50

|                    |   | TYPES OF PAIRS |   |   |   |   |   |
|--------------------|---|----------------|---|---|---|---|---|
|                    |   | 1              | 2 | 3 | 4 | 5 | 6 |
| INCOMPATIBLE PAIRS | 0 |                |   |   |   |   |   |
|                    | 1 |                |   |   |   |   |   |
|                    | 2 |                |   |   |   |   |   |

SL7159-7194  
E10-like hairpin

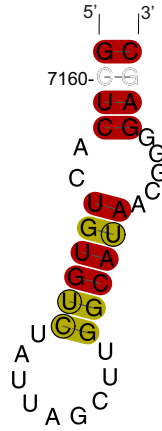

SL7159-7194  
E10-like hairpin

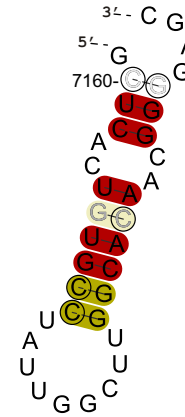

|   |   |            |    |           |   |          |       |
|---|---|------------|----|-----------|---|----------|-------|
| q | 1 | 1583233845 | gb | EU144042  | 1 | /1       | -36   |
| q | 1 | 199599827  | gb | GU7000001 | 1 | /1       | -36   |
| q | 1 | 239916537  | gb | GO141875  | 1 | /1       | -36   |
| q | 1 | 50604532   | gb | AY673831  | 1 | /1       | -36   |
| q | 1 | 3732271    | gb | U57056    | 1 | CXU57056 | /1-36 |
| q | 1 | 25225388   | gb | UJ0109481 | 1 | /1       | -36   |
| q | 1 | 209981445  | gb | FJ357838  | 1 | /1       | -36   |
| q | 1 | 1086164    | gb | AF231765  | 1 | /1       | -36   |
| q | 1 | 33532400   | gb | JN048469  | 1 | /1       | -36   |
| q | 1 | 80082986   | gb | JN040513  | 1 | /1       | -36   |
| q | 1 | 35523398   | gb | JN048468  | 1 | /1       | -36   |
| q | 1 | 76213      | gb | JX312064  | 1 | /1       | -36   |
| q | 1 | 323419     | gb | M33854    | 1 | CXA3CG   | /1-36 |
| q | 1 | 10863162   | gb | AF231764  | 1 | /1       | -36   |
| q | 1 | 10863160   | gb | AF231763  | 1 | /1       | -36   |
| q | 1 | 3033688301 | gb | AY752945  | 2 | /1       | -36   |
| q | 1 | 43392370   | gb | AY752945  | 1 | /1       | -36   |
| q | 1 | 323421     | gb | M16572    | 1 | CXA3G    | /1-36 |
| q | 1 | 323432     | gb | M88483    | 1 | CXA3CG   | /1-36 |
| q | 1 | 43399972   | gb | AY752946  | 1 | /1       | -36   |

[illegible]

CVB3

```
SL7159-7194\JX312064.1/1-36
g| 61127|emb|X00595.1|1-36
g| 458298|gb|U05876.1|CAU05876/1-36
g| 581533|gb|AF176044.1|1-36
g| 4406135|gb|AF085363.1|1-36
g| 59045|emb|X67706.1|1-36
g| 1373227|gb|U57056.1|CXU57056/1-36
g| 61031|emb|X05690.1|1-36
g| 61257|emb|V01150.1|1-36
g| 2231147|dbj|D00538.1|CXA221CG/1-36
g| 323895|gb|K01392.1|POL3137/1-36
g| 769799|emb|X84981.1|1-36
g| 323417|gb|M16560.1|CXA1G/1-36
```

(((...(((((((.....)))))))).)).)...  
 GGCACAGTGTCTATTAGCTTGGCATAACGGGAGC 36  
 GGCATATGTGCTTATGGCGCTGGACAACGGCGAAG 36  
 GATCCCTGTGTCTTATGGCGTGGACAATGCTAAGC 36  
 GCCCCCTGTCTATTAGCATGGACAACGGAAG 36  
 GCGGCGTGTCTATTGGCTGGACAATGAGAGC 36  
 GTTCATATGTCTATTGGCTGGACAATGCGAAG 36  
 GGCATATGTCTTATGGCTGGACAACGGGAGC 36  
 GGCCTGTGTCTTATGGCTGGACAATGAGAGC 36  
 GGCCTGTGCTTATAGCTTGGACAATGCGAAG 36  
 GGCATGTGTCTTATGGCTGGACAACGGCGAAG 36  
 GGCCTGTGTCTATTGGCTGGACAACGGGAAG 36  
 GCGGCATGTCTATTGGCTGGACAACGGGAGC 36  
 GCGGTGTGTCTATTGGCTGGACAACGGGAGC 36  
 .....10.....20.....30.....

enteroviruses

|                    |   | TYPES OF PAIRS |   |   |   |   |   |
|--------------------|---|----------------|---|---|---|---|---|
|                    |   | 1              | 2 | 3 | 4 | 5 | 6 |
| INCOMPATIBLE PAIRS | 0 |                |   |   |   |   |   |
|                    | 1 |                |   |   |   |   |   |
|                    | 2 |                |   |   |   |   |   |

CVB3

[illegible]

|                    |   | TYPES OF PAIRS |   |   |   |   |   |
|--------------------|---|----------------|---|---|---|---|---|
|                    |   | 1              | 2 | 3 | 4 | 5 | 6 |
| INCOMPATIBLE PAIRS | 0 |                |   |   |   |   |   |
|                    | 1 |                |   |   |   |   |   |
|                    | 2 |                |   |   |   |   |   |
